# Supplementary material for: Expanding the Described Metabolome of the Marine Cyanobacterium Moorea producens JHB through Orthogonal Natural Products Workflows
Source: PubMed Central journal article supplement (PMC4519256; doi:10.1371/journal.pone.0133297), 2015-07-29
Supplement: pone.0133297.s001.pdf [file pone.0133297.s001.pdf]

**Expanding the Described Metabolome of the Marine Cyanobacterium *Moorea  
producens* JHB through Orthogonal Natural Products Workflows**

Paul D. Boudreau<sup>1</sup>, Emily A. Monroe<sup>2</sup>, Suneet Mehrotra<sup>3</sup>, Shane Desfor<sup>1,4</sup>, Anton Korobeynikov<sup>5,6,7</sup>, David H. Sherman<sup>8</sup>, Thomas F. Murray<sup>3</sup>, Lena Gerwick<sup>1</sup>, Pieter C. Dorrestein<sup>9,10</sup>, and William H. Gerwick<sup>1,10\*</sup>

<sup>1</sup>Center for Marine Biotechnology and Biomedicine, Scripps Institution of Oceanography, University of California San Diego, La Jolla, California 92093, United States

<sup>2</sup> Department of Biology, William Paterson University, Wayne, New Jersey, 07470, United States of America

<sup>3</sup>Department of Pharmacology, Creighton University School of Medicine, Omaha, Nebraska 68178, United States of America

<sup>4</sup>Department of Biology, California State University, San Marcos, San Marcos, California, 92078, United States of America

<sup>5</sup>Algorithmic Biology Laboratory, St. Petersburg Academic University, Russian Academy of Sciences, St. Petersburg, Russia

<sup>6</sup>Department of Mathematics and Mechanics, St. Petersburg State University, St. Petersburg, Russia

<sup>7</sup>Center for Algorithmic Biotechnology, St. Petersburg State University, St. Petersburg, Russia

<sup>8</sup>Life Sciences Institute and Department of Medical Chemistry, University of Michigan, Ann Arbor, Michigan, United States of America

<sup>9</sup>Department of Chemistry and Biochemistry, University of California San Diego, La Jolla, California 92093, United States of America

<sup>10</sup>Skaggs School of Pharmacy and Pharmaceutical Sciences, University of California San Diego, La Jolla, California 92093, United States of America

\* Corresponding author

E-mail: [wgerwick@ucsd.edu](mailto:wgerwick@ucsd.edu)

### **The *M. producens* JHB Molecular Network**

- Figure A** Full JHB molecular network from LTQ-FT data.
- Figure B** Jamaicamides cluster within the JHB molecular network from LTQ-FT data.
- Figure C** IT-MS<sup>2</sup> fragment spectra for the jamaicamides from LTQ-FT data.
- Figure D** Hectochlorins cluster within the JHB molecular network from LTQ-FT data.
- Figure E** IT-MS<sup>2</sup> fragment spectra for the hectochlorins from LTQ-FT data.
- Table F** HRMS<sup>1</sup> Masses of observed for the hectochlorins and jamaicamides from LTQ-FT data.
- Figure G** Full JHB molecular network, iodide rich media, from LCQ data.
- Figure H** Jamaicamides cluster within the JHB molecular network, iodide rich media, from LCQ data.
- Figure I** IT-MS<sup>2</sup> fragment spectra for the jamaicamides, iodide rich media, from LCQ data.

### **Spectroscopic Data for Hectochlorin (1)**

- Table J** NMR data summary for hectochlorin (1).
- Figure K** <sup>1</sup>H-NMR (600 MHz, CDCl<sub>3</sub>) spectrum of hectochlorin (1).
- Figure L** <sup>13</sup>C-NMR (125 MHz, CDCl<sub>3</sub>) spectrum of hectochlorin (1).
- Figure M** HSQC-NMR (600 MHz, CDCl<sub>3</sub>) spectrum of hectochlorin (1).
- Figure N** HMBC-NMR (600 MHz, CDCl<sub>3</sub>) spectrum of hectochlorin (1).
- Figure O** TOCSY-NMR (600 MHz, CDCl<sub>3</sub>) spectrum of hectochlorin (1).
- Figure P** FT-MS<sup>2</sup> Fragment spectrum of hectochlorin (1).
- Figure Q** FT-MS<sup>2</sup> Fragment summary for hectochlorin (1).

### **Spectroscopic Data for Hectochlorin B (5)**

- Table R** NMR data summary for hectochlorin B (5).
- Figure S** <sup>1</sup>H-NMR (600 MHz, CDCl<sub>3</sub>) spectrum of hectochlorin B (5).
- Figure T** <sup>13</sup>C-NMR (125 MHz, CDCl<sub>3</sub>) spectrum of hectochlorin B (5).
- Figure U** HSQC-NMR (600 MHz, CDCl<sub>3</sub>) spectrum of hectochlorin B (5).
- Figure V** HMBC-NMR (600 MHz, CDCl<sub>3</sub>) spectrum of hectochlorin B (5).
- Figure W** TOCSY-NMR (600 MHz, CDCl<sub>3</sub>) spectrum of hectochlorin B (5).
- Figure X** FT-MS<sup>2</sup> Fragment spectrum of hectochlorin B (5).
- Figure Y** FT-MS<sup>2</sup> Fragment summary for hectochlorin B (5).

### **Spectroscopic Data for Hectochlorin C (6)**

- Figure Z** FT-MS<sup>2</sup> Fragment spectrum of hectochlorin C (6).
- Figure AA** FT-MS<sup>2</sup> Fragment summary for hectochlorin C (6).

### **Spectroscopic Data for Hectochlorin D (7)**

- Figure AB** FT-MS<sup>2</sup> Fragment spectrum of hectochlorin D (7).

**Figure AC** FT-MS<sup>2</sup> Fragment summary for hectochlorin D (7).

### **Biosynthetic Pathway Divergence for Jamaicamide A and D (2 and 8)**

**Figure AD** Proposed Biosynthetic Pathway Divergence for Jamaicamide A and D (2 and 8).

### **Spectroscopic Data for Jamaicamide D (8)**

**Table AE** NMR data summary for jamaicamide D (8).

**Figure AF** <sup>1</sup>H-NMR (500 MHz, CDCl<sub>3</sub>) spectrum of jamaicamide D (8).

**Figure AG** HMBC-NMR (500 MHz, CDCl<sub>3</sub>) spectrum of jamaicamide D (8).

**Figure AH** TOCSY-NMR (500 MHz, CDCl<sub>3</sub>) spectrum of jamaicamide D (8).

### **Spectroscopic Data for Jamaicamide F (12)**

**Table AI** NMR data summary for jamaicamide F (12).

**Figure AJ** <sup>1</sup>H-NMR (600 MHz, CDCl<sub>3</sub>) spectrum of jamaicamide F (12).

**Figure AK** <sup>13</sup>C-NMR (125 MHz, CDCl<sub>3</sub>) spectrum of jamaicamide F (12).

**Figure AL** HSQC-NMR (600 MHz, CDCl<sub>3</sub>) spectrum of jamaicamide F (12).

**Figure AM** HMBC-NMR (600 MHz, CDCl<sub>3</sub>) spectrum of jamaicamide F (12).

**Figure AN** TOCSY-NMR (600 MHz, CDCl<sub>3</sub>) spectrum of jamaicamide F (12).

**Figure AO** MS<sup>2</sup> fragment spectra of jamaicamide F (12).

### **Bioassay Data for Jamaicamides A, B, and F (2,3, and 12)**

**Figure AP** Effect of the jamaicamides on the veratridine-induced Ca<sup>2+</sup> influx in murine neocortical neurons.

**Figure AQ** Effect of the jamaicamides on the veratridine-induced Na<sup>+</sup> influx in murine neocortical neurons.

### **Spectroscopic Data for Hectoramide (4)**

**Figure AR** <sup>1</sup>H-NMR (600 MHz, CDCl<sub>3</sub>) spectrum of hectoramide (4).

**Figure AS** <sup>13</sup>C-NMR (600 MHz, CDCl<sub>3</sub>) spectrum of hectoramide (4).

**Figure AT** Predicted <sup>13</sup>C-NMR shifts for potential structures of hectoramide (4).

**Figure AU** HSQC (600 MHz, CDCl<sub>3</sub>) spectrum of hectoramide (4).

**Figure AV** HMBC (600 MHz, CDCl<sub>3</sub>) spectrum of hectoramide (4), long duration.

**Figure AW** HMBC (600 MHz, CDCl<sub>3</sub>) spectrum of hectoramide (4), short duration.

**Figure AX** TOCSY (600 MHz, CDCl<sub>3</sub>) spectrum of hectoramide (4).

**Figure AY** GC-MS analysis of 2-S-octonol ester standards.

**Figure AZ** GC-MS analysis of 2-S-octonol ester derivatized hydrolysate of hectoramide (4).

**Figure AAA** Marfey's analysis of D-FDAA derivatized hydrolysate of hectoramide (4).

**Figure A. Full *Moorea producens* JHB Molecular Network, from LTQ-FT Data.**

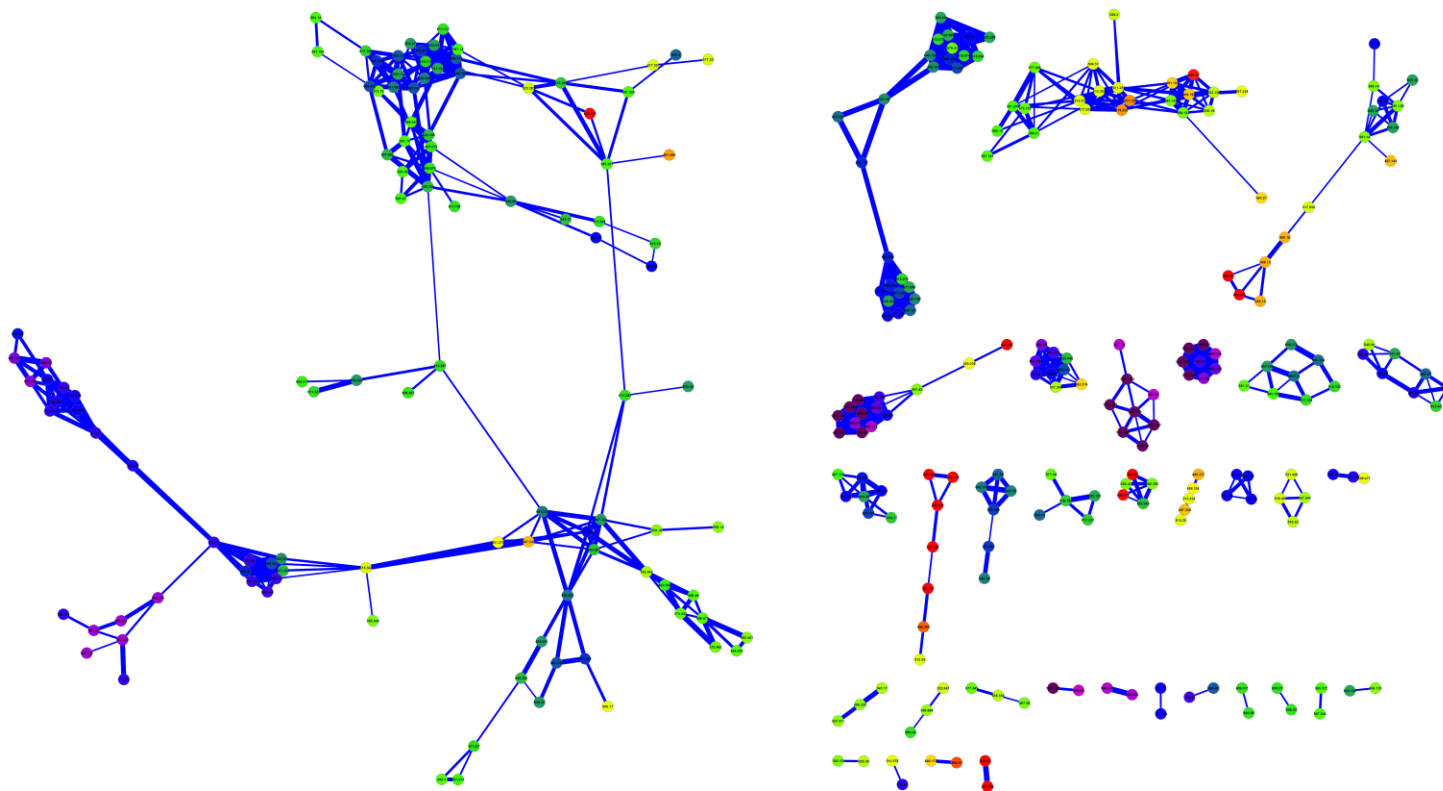

Figure B. Hectochlorin Cluster within the JHB Molecular Network, from LTQ-FT Data.

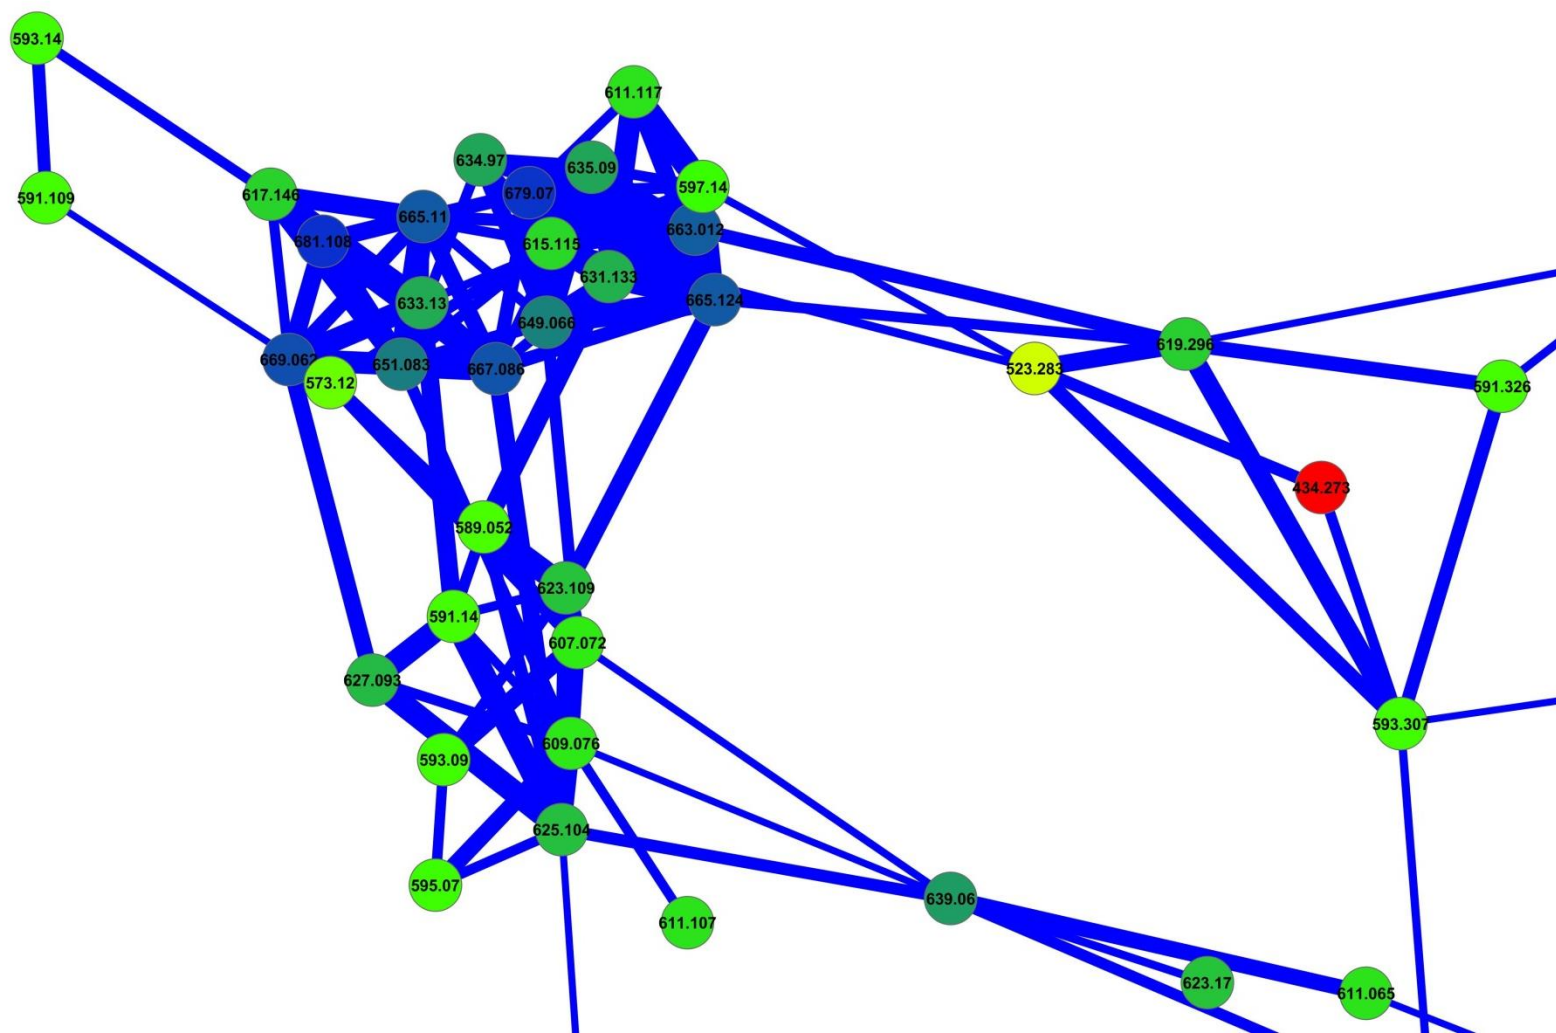

**Figure C. IT-MS<sup>2</sup> Fragment Spectra for the Hectochlorins, from LTQ-FT Data.**

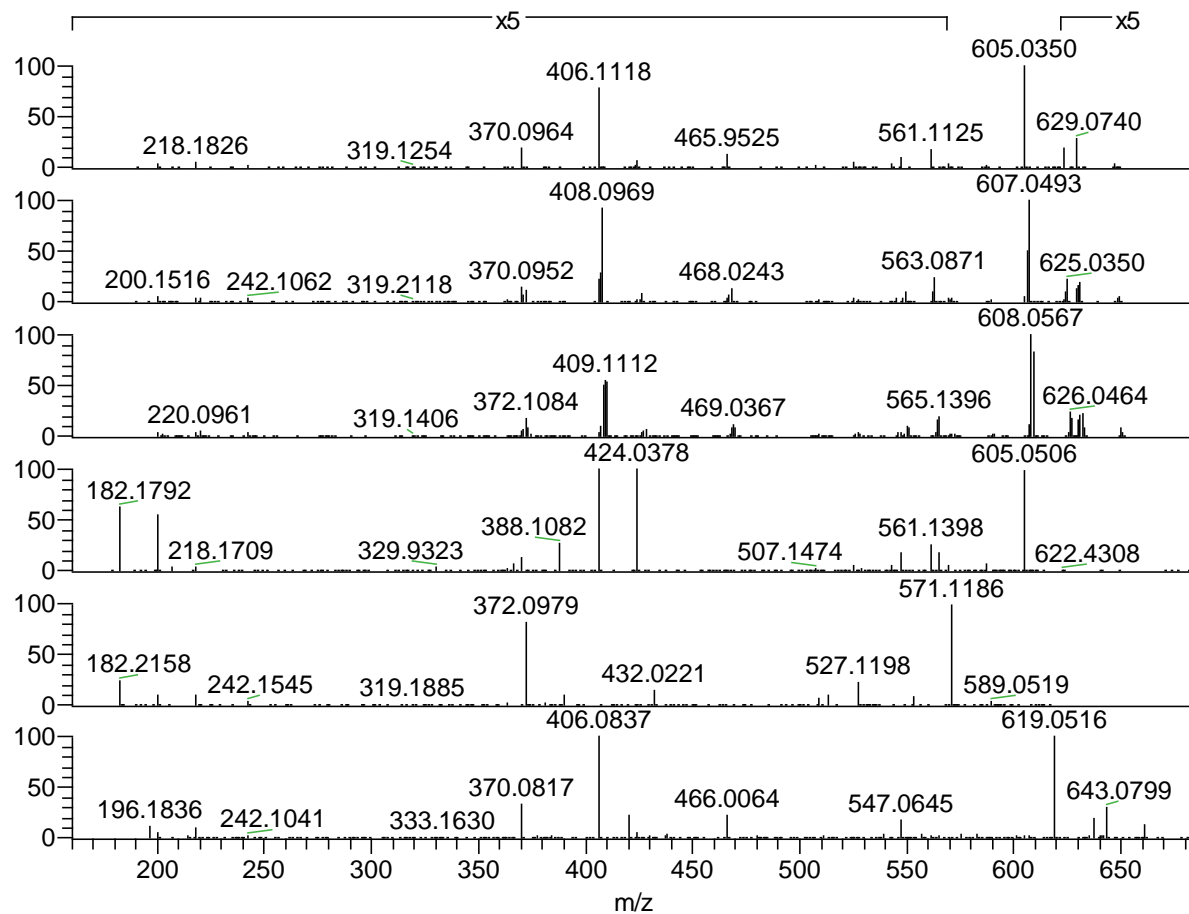

Fragment Spectra:

Hectochlorin (1) [M + H]<sup>+</sup>,  
Parent Mass 665 m/z

Hectochlorin (1) [M<sup>37</sup>Cl + H]<sup>+</sup>,  
Parent Mass 667 m/z

Hectochlorin (1) [M<sup>37</sup>Cl<sub>2</sub> + H]<sup>+</sup>,  
Parent Mass 669 m/z

Hectochlorin B (5) [M + H]<sup>+</sup>,  
Parent Mass 623 m/z

Hectochlorin C (6) [M + H]<sup>+</sup>,  
Parent Mass 631 m/z

Hectochlorin D (7) [M + H]<sup>+</sup>,  
Parent Mass 679 m/z

Figure D. Jamaicamide Cluster within the JHB Molecular Network, from LTQ-FT Data.

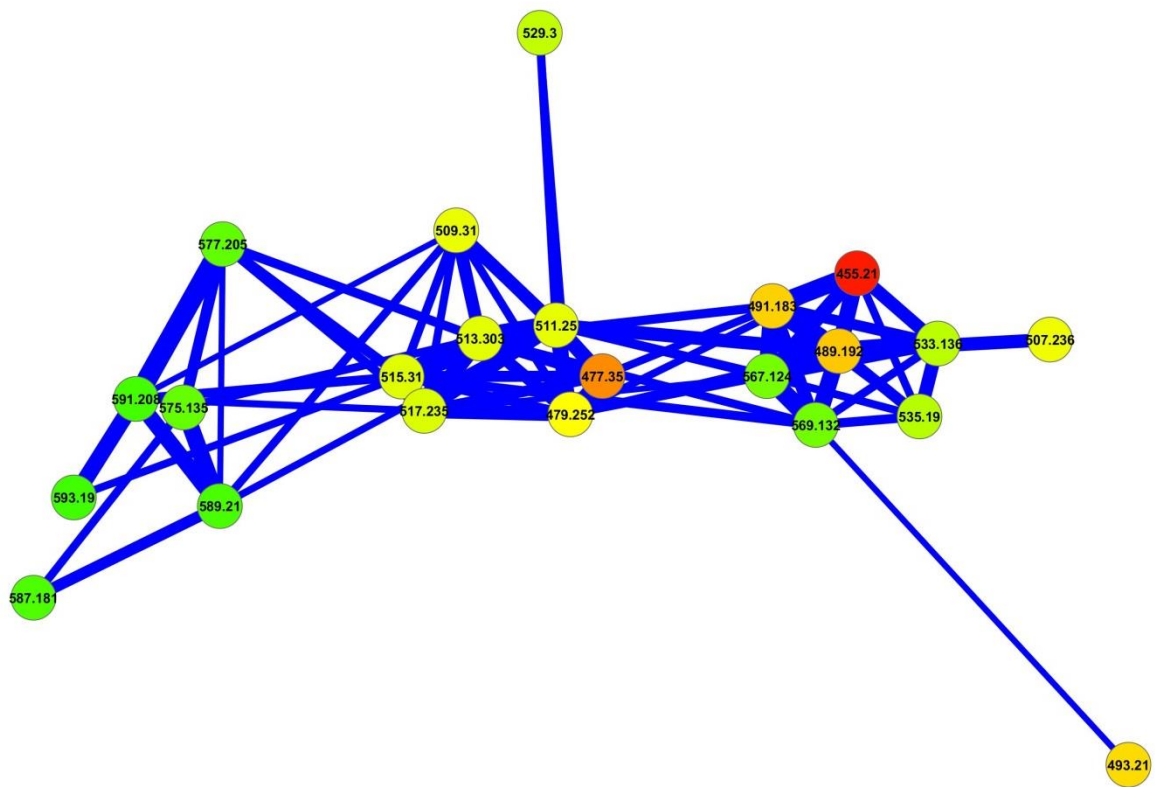

**Figure E. IT-MS<sup>2</sup> Fragment Spectra for the Jamaicamides, from LTQ-FT Data.**

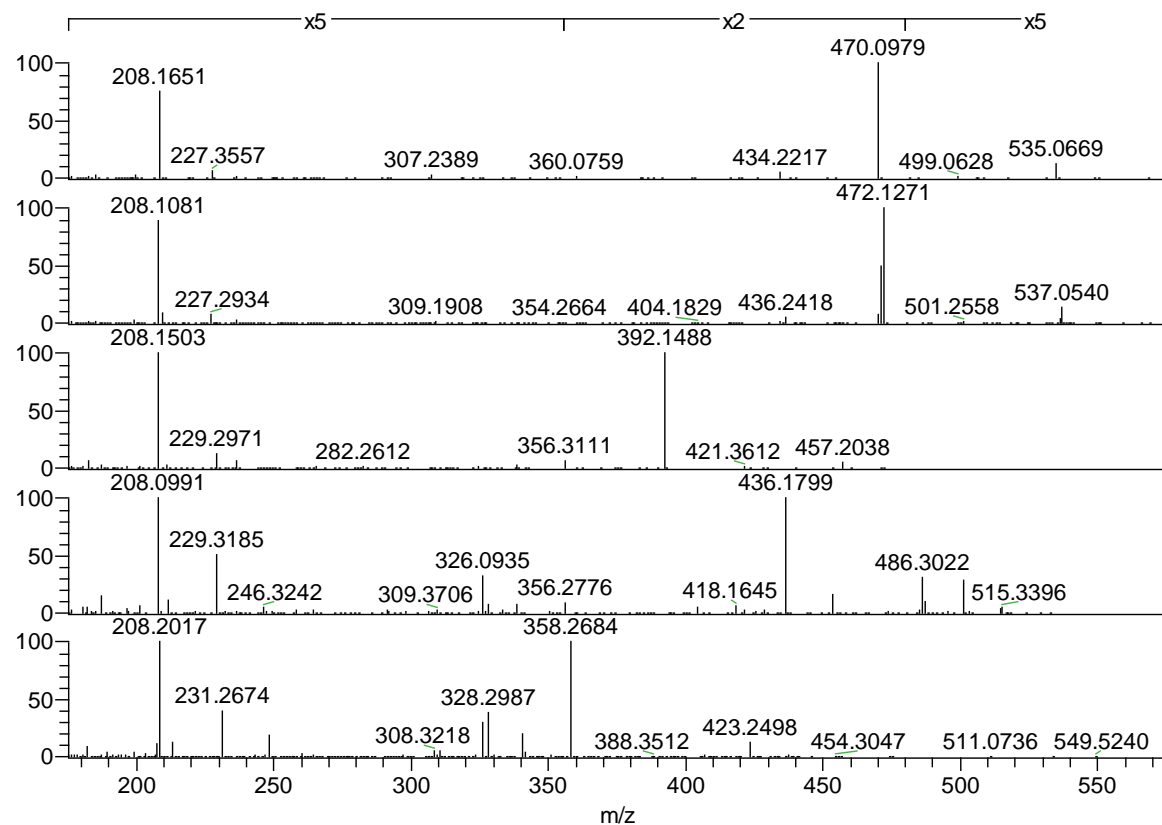

Fragment Spectra:

Jamaicamide A (**2**) [M + H]<sup>+</sup>,  
Parent Mass 567 m/z

Jamaicamide A (**2**) [M<sup>81</sup>Br + H]<sup>+</sup>,  
Parent Mass 569 m/z

Jamaicamide B (**3**) [M + H]<sup>+</sup>,  
Parent Mass 489 m/z

Jamaicamide D (**8**) [M + H]<sup>+</sup>,  
Parent Mass 533 m/z

Jamaicamide E (**9**) [M + H]<sup>+</sup>,  
Parent Mass 455 m/z



**Table F. HRMS<sup>1</sup> Masses of Observed for the Hectochlorins and Jamaicamides, from LTQ-FT Data.**

| Compound           | Calculated Formula                                                                                                                                                                                                                                                                                                                                                                                                                                                                                                               | LCMS Observed HRMS <sup>1</sup> Mass <i>m/z</i>                                                                                  | Retention Time (min) | Isolated Compound HRMS <sup>1</sup> Mass <i>m/z</i>                                                                              |
|--------------------|----------------------------------------------------------------------------------------------------------------------------------------------------------------------------------------------------------------------------------------------------------------------------------------------------------------------------------------------------------------------------------------------------------------------------------------------------------------------------------------------------------------------------------|----------------------------------------------------------------------------------------------------------------------------------|----------------------|----------------------------------------------------------------------------------------------------------------------------------|
| Hectochlorin (1)   | C <sub>27</sub> H <sub>35</sub> Cl <sub>2</sub> N <sub>2</sub> O <sub>9</sub> S <sub>2</sub> [M+H] <sup>+</sup> , 665.1156<br>C <sub>27</sub> H <sub>35</sub> Cl <sup>37</sup> CIN <sub>2</sub> O <sub>9</sub> S <sub>2</sub> [M+H] <sup>+</sup> , 667.1126<br>C <sub>27</sub> H <sub>34</sub> Cl <sub>2</sub> N <sub>2</sub> NaO <sub>9</sub> S <sub>2</sub> [M+Na] <sup>+</sup> , 687.0975<br>C <sub>27</sub> H <sub>34</sub> Cl <sup>37</sup> CIN <sub>2</sub> NaO <sub>9</sub> S <sub>2</sub> [M+Na] <sup>+</sup> , 689.0945 | 665.1182, 3.9 ppm, 2.6 mamu<br>667.1153, 4.0 ppm, 2.7 mamu<br>687.1070, 13.8 ppm, 9.5 mamu<br>689.1057, 16.2 ppm, 11.2 mamu      | 23.8                 | 665.1154, -0.3 ppm, -0.2 mamu<br>667.1126, 0 ppm, 0 mamu<br>687.0976, 0.1 ppm, 0.1 mamu<br>689.0948, 0.4 ppm, 0.3 mamu           |
| Hectochlorin B (5) | C <sub>25</sub> H <sub>33</sub> Cl <sub>2</sub> N <sub>2</sub> O <sub>8</sub> S <sub>2</sub> [M+H] <sup>+</sup> , 623.1050<br>C <sub>25</sub> H <sub>33</sub> Cl <sup>37</sup> CIN <sub>2</sub> O <sub>8</sub> S <sub>2</sub> [M+H] <sup>+</sup> , 625.1020<br>C <sub>25</sub> H <sub>33</sub> Cl <sub>2</sub> N <sub>2</sub> NaO <sub>8</sub> S <sub>2</sub> [M+Na] <sup>+</sup> , 645.0869<br>C <sub>25</sub> H <sub>33</sub> Cl <sup>37</sup> CIN <sub>2</sub> NaO <sub>8</sub> S <sub>2</sub> [M+Na] <sup>+</sup> , 647.0840 | 623.1041, -1.4 ppm, -0.9 mamu<br>625.1019, -0.2 ppm, -0.1 mamu<br>645.0884, 2.3 ppm, 1.5 mamu<br>647.0856, 2.5 ppm, 1.6 mamu     | 20.3                 | 623.1050, 0 ppm, 0 mamu<br>625.1021, 0.2 ppm, 0.1 mamu<br>645.0870, 0.2 ppm, 0.1 mamu<br>647.0841, 0.2 ppm, 0.1 mamu             |
| Hectochlorin C (6) | C <sub>27</sub> H <sub>36</sub> ClN <sub>2</sub> O <sub>9</sub> S <sub>2</sub> [M+H] <sup>+</sup> , 631.1545<br>C <sub>27</sub> H <sub>36</sub> <sup>37</sup> CIN <sub>2</sub> O <sub>9</sub> S <sub>2</sub> [M+H] <sup>+</sup> , 633.1516<br>C <sub>27</sub> H <sub>36</sub> ClN <sub>2</sub> NaO <sub>9</sub> S <sub>2</sub> [M+Na] <sup>+</sup> , 653.1365<br>C <sub>27</sub> H <sub>36</sub> <sup>37</sup> CIN <sub>2</sub> NaO <sub>9</sub> S <sub>2</sub> [M+Na] <sup>+</sup> , 655.1335                                   | 631.1516, -4.6 ppm, -2.9 mamu<br>633.1492, -3.8 ppm, -2.4 mamu<br>653.1333, -4.9 ppm, -3.2 mamu<br>655.1312, -3.5 ppm, -2.3 mamu | 22.6                 | 631.1545, 0.0 ppm, 0 mamu<br>633.1519, 0.5 ppm, 0.3 mamu<br>653.1360, -0.8 ppm, 0.5 mamu<br>655.1337, 0.3 ppm, 0.2 mamu          |
| Hectochlorin D (7) | C <sub>28</sub> H <sub>37</sub> Cl <sub>2</sub> N <sub>2</sub> O <sub>9</sub> S <sub>2</sub> [M+H] <sup>+</sup> , 679.1312<br>C <sub>28</sub> H <sub>37</sub> Cl <sup>37</sup> CIN <sub>2</sub> O <sub>9</sub> S <sub>2</sub> [M+H] <sup>+</sup> , 681.1283<br>C <sub>28</sub> H <sub>37</sub> Cl <sub>2</sub> N <sub>2</sub> NaO <sub>9</sub> S <sub>2</sub> [M+Na] <sup>+</sup> , 701.1131<br>C <sub>28</sub> H <sub>37</sub> Cl <sup>37</sup> CIN <sub>2</sub> NaO <sub>9</sub> S <sub>2</sub> [M+Na] <sup>+</sup> , 703.1102 | 679.1273, -5.7 ppm, -3.9 mamu<br>681.1245, -5.8 ppm, -3.8 mamu<br>701.1091, -5.7 ppm, -4.0 mamu<br>703.1065, -5.3 ppm, -3.7 mamu | 25.8                 | 679.1306, -0.9 ppm, -0.6 mamu<br>681.1274, -1.3 ppm, -0.9 mamu<br>701.1129, -0.3 ppm, -0.2 mamu<br>703.1097, -0.7 ppm, -0.5 mamu |
| Jamaicamide A (2)  | C <sub>27</sub> H <sub>37</sub> BrClN <sub>2</sub> O <sub>4</sub> [M+H] <sup>+</sup> , 567.1620<br>C <sub>27</sub> H <sub>37</sub> <sup>81</sup> BrClN <sub>2</sub> O <sub>4</sub> [M+H] <sup>+</sup> , 569.1599<br>C <sub>27</sub> H <sub>36</sub> BrClN <sub>2</sub> NaO <sub>4</sub> [M+Na] <sup>+</sup> , 589.1439<br>C <sub>27</sub> H <sub>36</sub> <sup>81</sup> BrClN <sub>2</sub> NaO <sub>4</sub> [M+Na] <sup>+</sup> , 591.1419                                                                                       | 567.1631, 1.9 ppm, 1.1 mamu<br>569.1601, 0.3 ppm, 0.2 mamu<br>589.1478, 6.6 ppm, 3.9 mamu<br>591.1450, 5.2 ppm, 3.1 mamu         | 30.5                 | 567.1621, 0.2 ppm, 0.1 mamu<br>569.1597, -0.4 ppm, -0.2 mamu<br>589.1442, 0.5 ppm, 0.3 mamu<br>591.1418, -0.2 ppm, -0.1 mamu     |
| Jamaicamide B (3)  | C <sub>27</sub> H <sub>38</sub> ClN <sub>2</sub> O <sub>4</sub> [M+H] <sup>+</sup> , 489.2515<br>C <sub>27</sub> H <sub>38</sub> <sup>37</sup> ClN <sub>2</sub> O <sub>4</sub> [M+H] <sup>+</sup> , 491.2485<br>C <sub>27</sub> H <sub>37</sub> ClN <sub>2</sub> NaO <sub>4</sub> [M+Na] <sup>+</sup> , 511.2334<br>C <sub>27</sub> H <sub>37</sub> <sup>37</sup> ClN <sub>2</sub> NaO <sub>4</sub> [M+Na] <sup>+</sup> , 513.2305                                                                                               | 489.2515, 0 ppm, 0 mamu<br>491.2510, 5.1 ppm, 2.5 mamu<br>511.2358, 4.7 ppm, 2.4 mamu<br>513.2336, 6.0 ppm, 3.1 mamu             | 27.2                 | 489.2513, -0.4 ppm, -0.2 mamu<br>491.2487, 0.4 ppm, 0.2 mamu<br>511.2333, -0.2 ppm, 0.1 mamu<br>513.2306, 0.2 ppm, 0.1 mamu      |
| Jamaicamide D (8)  | C <sub>27</sub> H <sub>38</sub> BrN <sub>2</sub> O <sub>4</sub> [M+H] <sup>+</sup> , 533.2009<br>C <sub>27</sub> H <sub>38</sub> <sup>81</sup> BrN <sub>2</sub> O <sub>4</sub> [M+H] <sup>+</sup> , 535.1989<br>C <sub>27</sub> H <sub>37</sub> BrN <sub>2</sub> NaO <sub>4</sub> [M+Na] <sup>+</sup> , 555.1829<br>C <sub>27</sub> H <sub>37</sub> <sup>81</sup> BrN <sub>2</sub> NaO <sub>4</sub> [M+Na] <sup>+</sup> , 557.1808                                                                                               | 533.1983, -4.9 ppm, -2.6 mamu<br>535.1962, -5.0 ppm, -2.7 mamu<br>555.1799, -5.4 ppm, -3.0 mamu<br>557.1778, -5.4 ppm, -3.0 mamu | 29.9                 | 533.2012, 0.6 ppm, 0.3 mamu<br>535.1991, 0.4 ppm, 0.2 mamu<br>555.1833, 0.7 ppm, 0.4 mamu<br>557.1812, 0.7 ppm, 0.4 mamu         |
| Jamaicamide E (9)  | C <sub>27</sub> H <sub>39</sub> N <sub>2</sub> O <sub>4</sub> [M+H] <sup>+</sup> , 455.2904<br>C <sub>27</sub> H <sub>38</sub> N <sub>2</sub> NaO <sub>4</sub> [M+Na] <sup>+</sup> , 477.2724                                                                                                                                                                                                                                                                                                                                    | 455.2877, -5.9 ppm, -2.7 mamu<br>477.2693, -6.5 ppm, -3.1 mamu                                                                   | 26.5                 | Not Isolated by HPLC                                                                                                             |
| Jamaicamide F (12) | C <sub>27</sub> H <sub>37</sub> ClIN <sub>2</sub> O <sub>4</sub> [M+H] <sup>+</sup> , 615.1481<br>C <sub>27</sub> H <sub>37</sub> <sup>37</sup> ClIN <sub>2</sub> O <sub>4</sub> [M+H] <sup>+</sup> , 617.1452<br>C <sub>27</sub> H <sub>36</sub> ClIN <sub>2</sub> NaO <sub>4</sub> [M+Na] <sup>+</sup> , 637.1300<br>C <sub>27</sub> H <sub>36</sub> <sup>37</sup> ClIN <sub>2</sub> NaO <sub>4</sub> [M+Na] <sup>+</sup> , 639.1271                                                                                           | 615.1549, 11.1 ppm, 6.8 mamu<br>617.1516, 10.4 ppm, 6.4 mamu<br>637.1363, 9.9 ppm, 6.3 mamu<br>639.1333, 9.7 ppm, 6.2 mamu       | 29.4                 | 615.1471, -1.6 ppm, -1.0 mamu<br>617.1441, -1.8 ppm, -1.1 mamu<br>637.1289, -1.7 ppm, -1.1 mamu<br>639.1259, -1.9 ppm, -1.2 mamu |

**Figure G. Full JHB Molecular Network, Iodide Rich Media, from LCQ Data.**

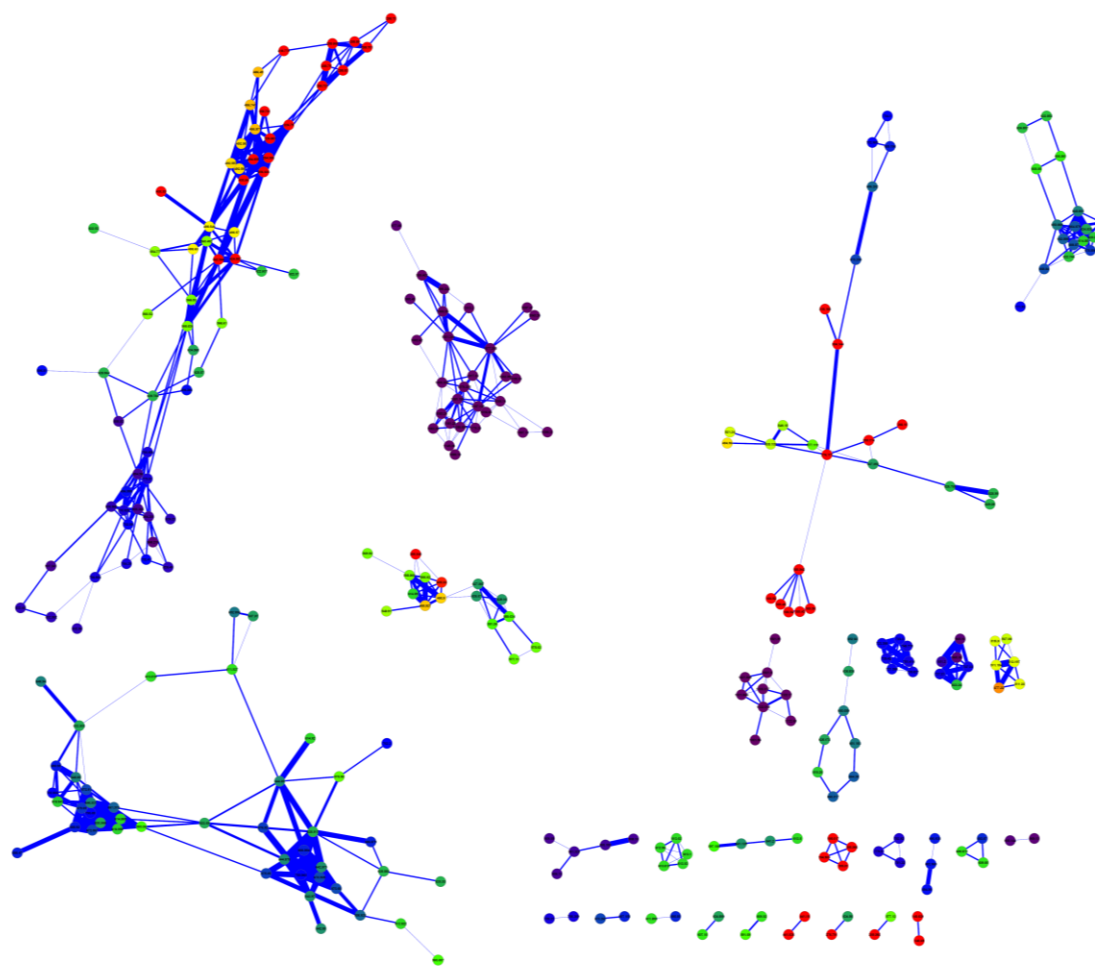

Figure H. Jamaicamides Cluster within the JHB Molecular Network, Iodide Rich Media, from LCQ Data.

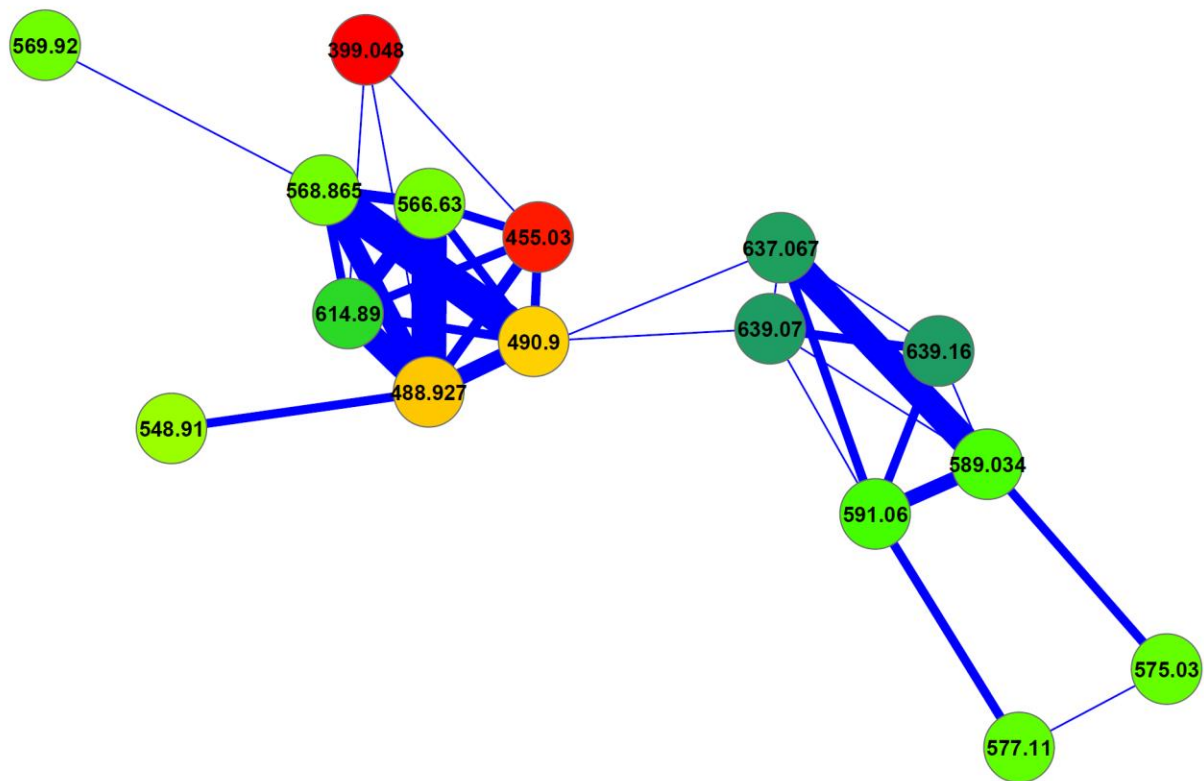

**Figure I. IT-MS<sup>2</sup> Fragment Spectra for the Jamaicaamides, Iodide Rich Media, from LCQ Data.**

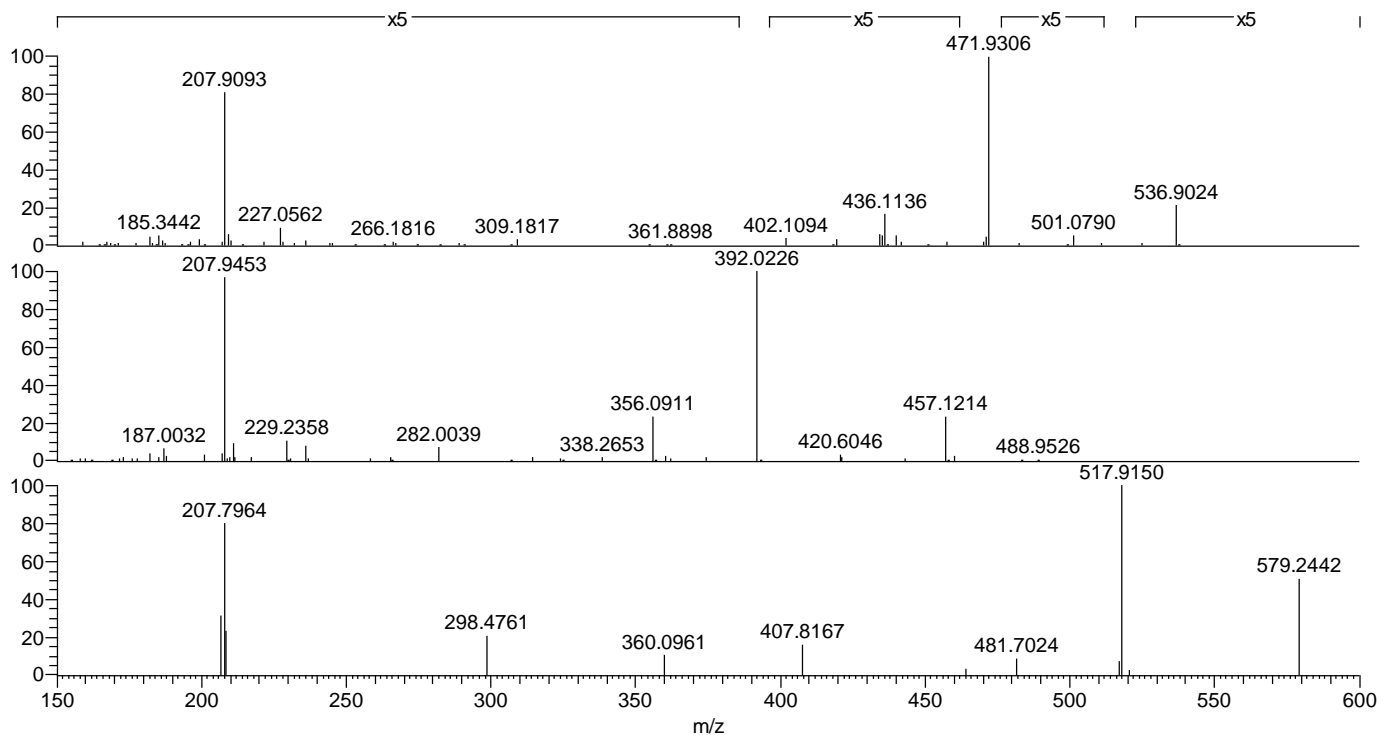

Fragment Spectra:

Jamaicamide A (2)  
[M<sup>81</sup>Br + H]<sup>+</sup>,  
Parent Mass 569 *m/z*

Jamaicamide B (3)  
[M + H]<sup>+</sup>,  
Parent Mass 489 *m/z*

Jamaicamide F (12)  
[M + H]<sup>+</sup>,  
Parent Mass 615 *m/z*

**Table J. NMR Data Summary for Hectochlorin (1).**

| Position | $\delta_C$ , type <sup>a</sup> | $\delta_H$ (J in Hz) <sup>b</sup> | HMBC <sup>b</sup> | TOCSY <sup>b</sup> |
|----------|--------------------------------|-----------------------------------|-------------------|--------------------|
| 1        | 172.9, C                       | --                                |                   |                    |
| 2        | 42.6, CH                       | 3.16, quintet (7.4)               | 1, 3, 9           | 3-6, 9             |
| 3        | 75.2, CH                       | 5.35, m                           |                   | 2, 4-6, 9          |
| 4a       | 30.9, CH <sub>2</sub>          | 1.71, m                           |                   | 2, 3, 4b, 5, 6, 9  |
| 4b       | 30.9, CH <sub>2</sub>          | 1.86, m                           |                   | 2, 3, 4a, 5, 6, 9  |
| 5        | 20.9, CH <sub>2</sub>          | 1.71, m                           |                   | 2-4, 6, 9          |
| 6a       | 49.3, CH <sub>2</sub>          | 2.26, m                           |                   | 2-5, 6b, 9         |
| 6b       | 49.3, CH <sub>2</sub>          | 2.15, m                           |                   | 2-5, 6a, 9         |
| 7        | 90.4, C                        | --                                |                   |                    |
| 8        | 37.2, CH <sub>3</sub>          | 2.11, s                           | 6,7               |                    |
| 9        | 15.1, CH <sub>3</sub>          | 1.29, d (7.4)                     | 1-3, self         | 2-6                |
| 10       | 161.1, C                       | --                                |                   |                    |
| 11       | 147.0, C                       | --                                |                   |                    |
| 12       | 128.6, CH                      | 8.17, s                           | 11, 13            | 14                 |
| 13       | 166.3, C <sup>c</sup>          | --                                |                   |                    |
| 14       | 74.7, CH                       | 6.84, s                           | 13, 15-17, 26     | 12                 |
| 15       | 82.0, C                        | --                                |                   |                    |
| 16       | 24.4, CH <sub>3</sub>          | 1.84, s                           | 14, 15, 17, self  |                    |
| 17       | 21.9, CH <sub>3</sub>          | 1.61, s                           | 14-16, self       |                    |
| 18       | 160.4, C                       | --                                |                   |                    |
| 19       | 147.5, C                       | --                                |                   |                    |
| 20       | 127.7, CH                      | 7.94, s                           | 19, 21            |                    |
| 21       | 165.1, C                       | --                                |                   |                    |
| 22       | 77.8, CH                       | 5.67, s                           | 1, 21, 23, 25     |                    |
| 23       | 71.6, C                        | --                                |                   |                    |
| 24       | 26.7, CH <sub>3</sub>          | 1.31, s                           | 22, 23, 25        |                    |
| 25       | 26.0, CH <sub>3</sub>          | 1.37, s                           | 22, 24            |                    |
| 26       | 168.7, C                       | --                                |                   |                    |
| 27       | 20.9, CH <sub>3</sub>          | 2.19, s                           | 26, self          |                    |

All experiments in CDCl<sub>3</sub> with TMS standard, 1% v/v for <sup>13</sup>C experiment, and 0.3% v/v for the rest. <sup>a</sup>Spectrum collected on a Varian VX 500 MHz with <sup>13</sup>C-optimized cryoprobe. <sup>b</sup>Spectra collected on a Bruker 600 MHz (600 MHz and 150 MHz for the <sup>1</sup>H and <sup>13</sup>C nuclei respectively) with 1.7 mm inverse cryo-probe. <sup>c</sup>Signal by projection from the HMBC experiment.

**Figure K.  $^1\text{H-NMR}$  (600 MHz,  $\text{CDCl}_3$ ) Spectrum of Hectochlorin (1).**

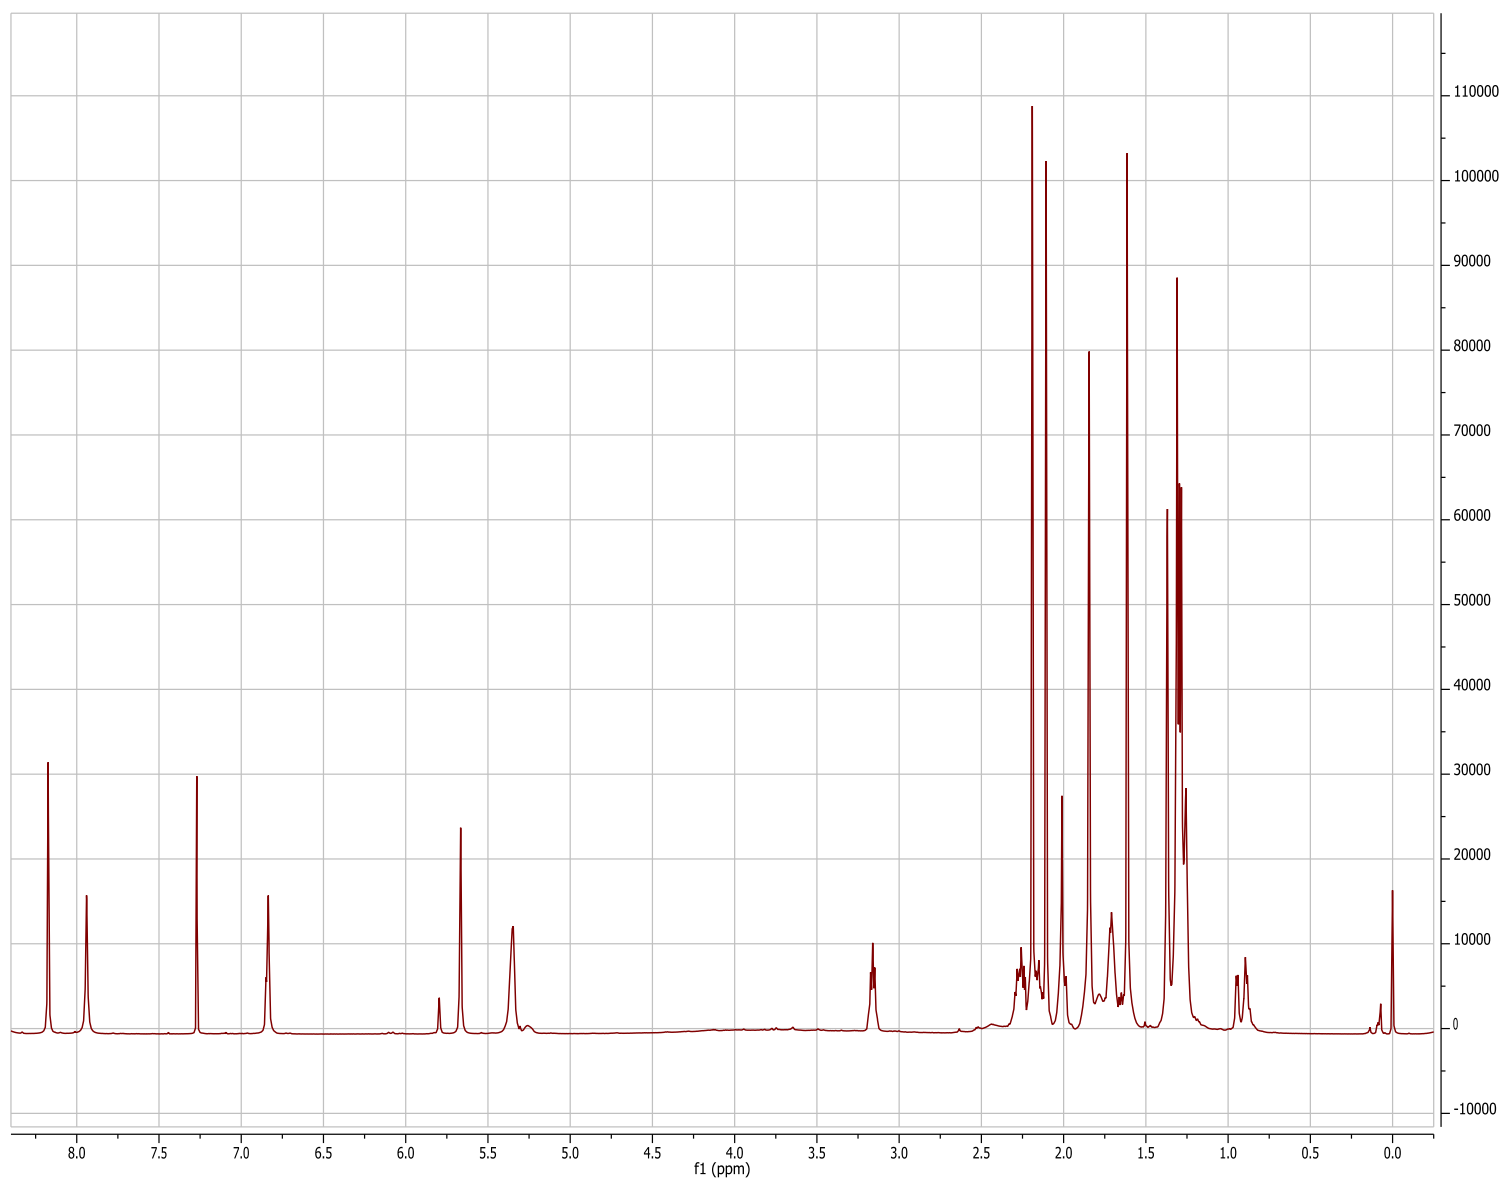

Figure L.  $^{13}\text{C}$ -NMR (125 MHz,  $\text{CDCl}_3$ ) Spectrum of Hectochlorin (1).

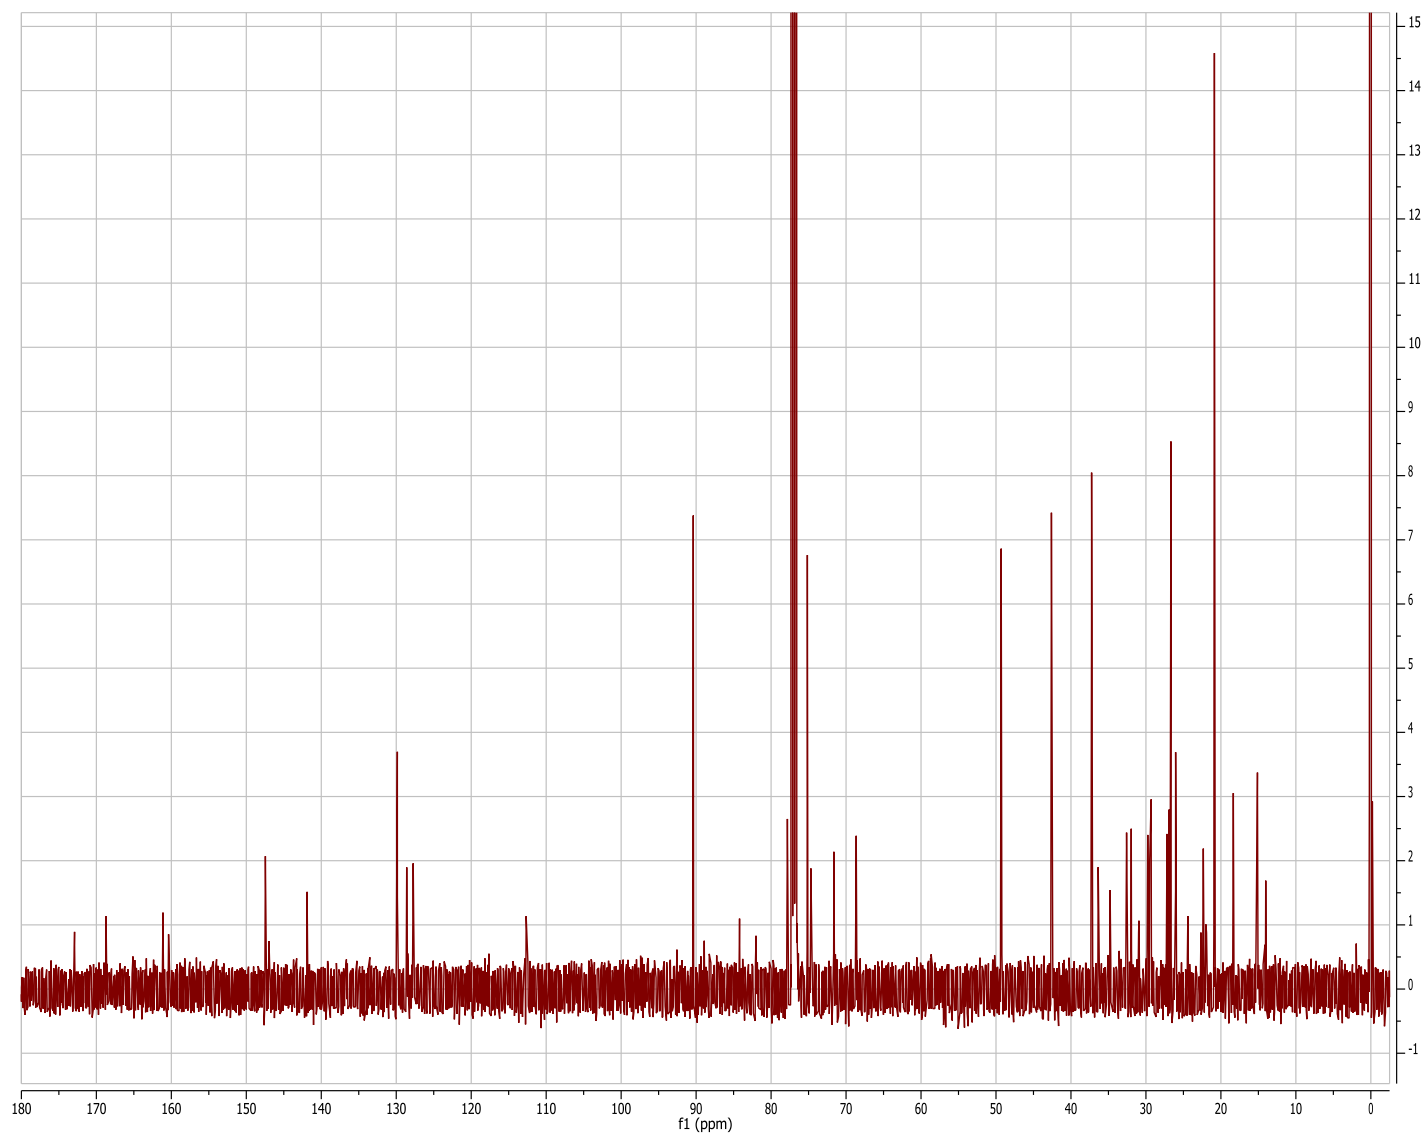

Benzene contamination at 129.8 ppm.

**Figure M. HSQC-NMR (600 MHz, CDCl<sub>3</sub>) Spectrum of Hectochlorin (1).**

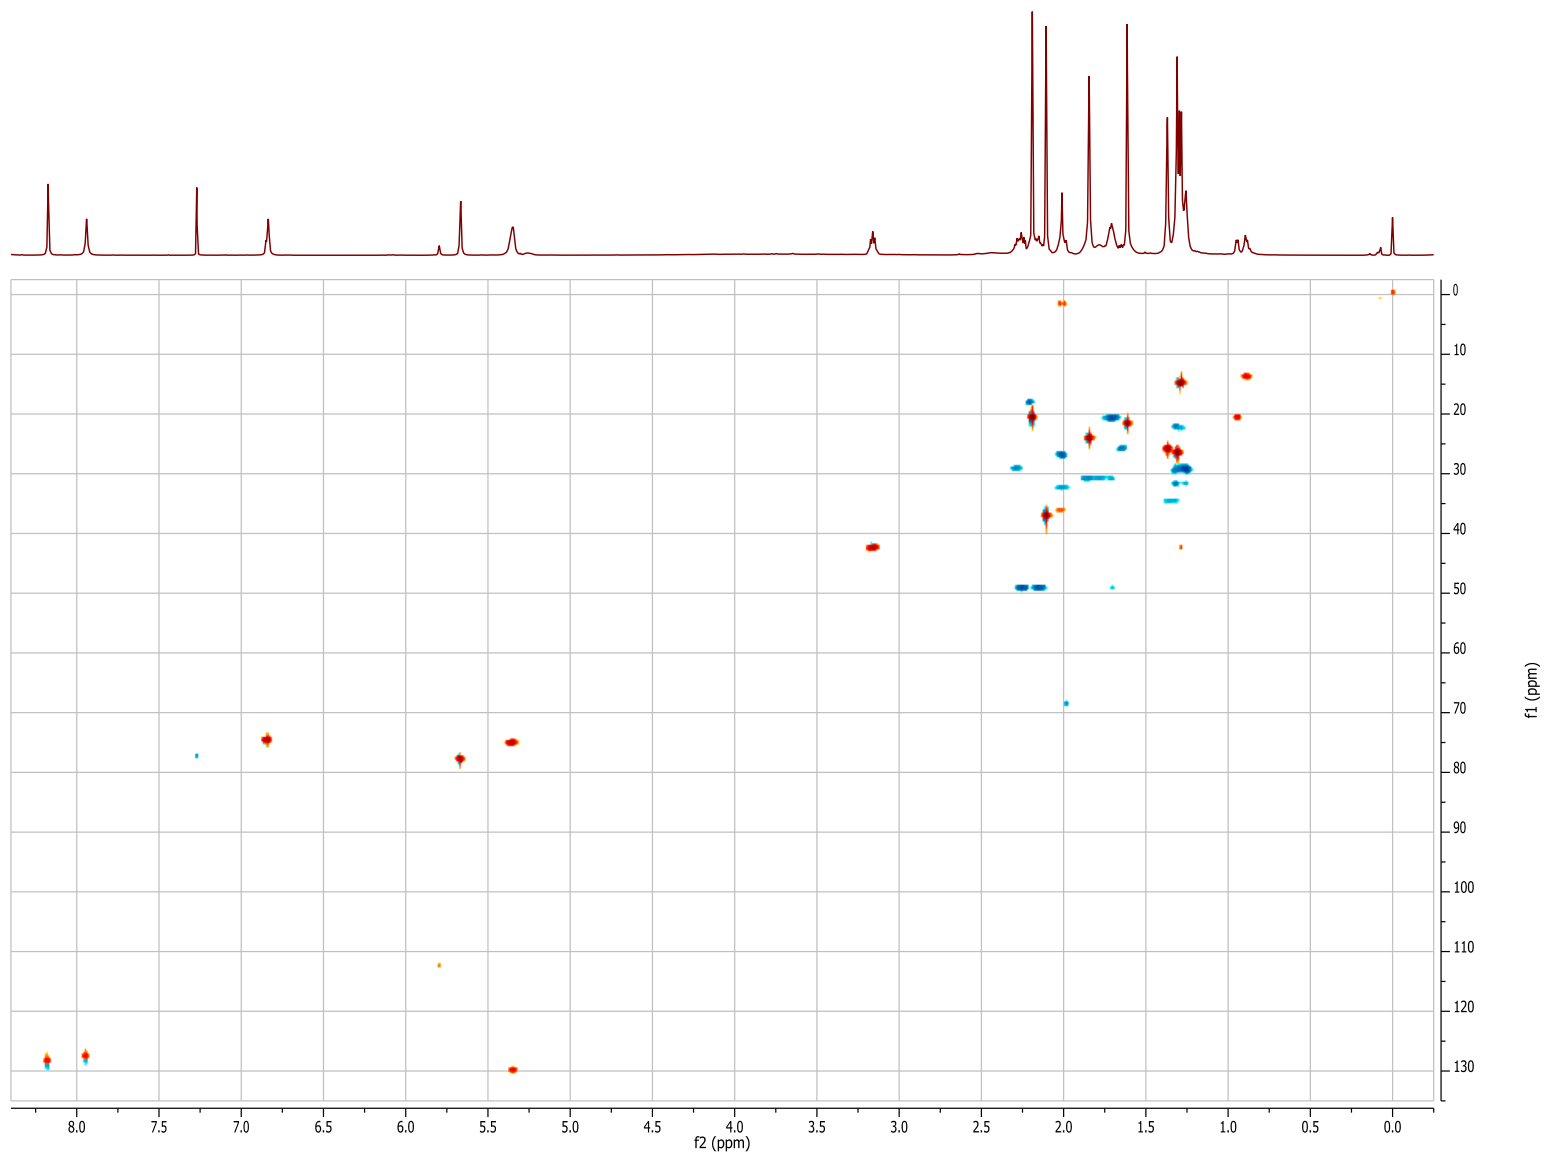



**Figure N. HMBC-NMR (600 MHz, CDCl<sub>3</sub>) Spectrum of Hectochlorin (1).**

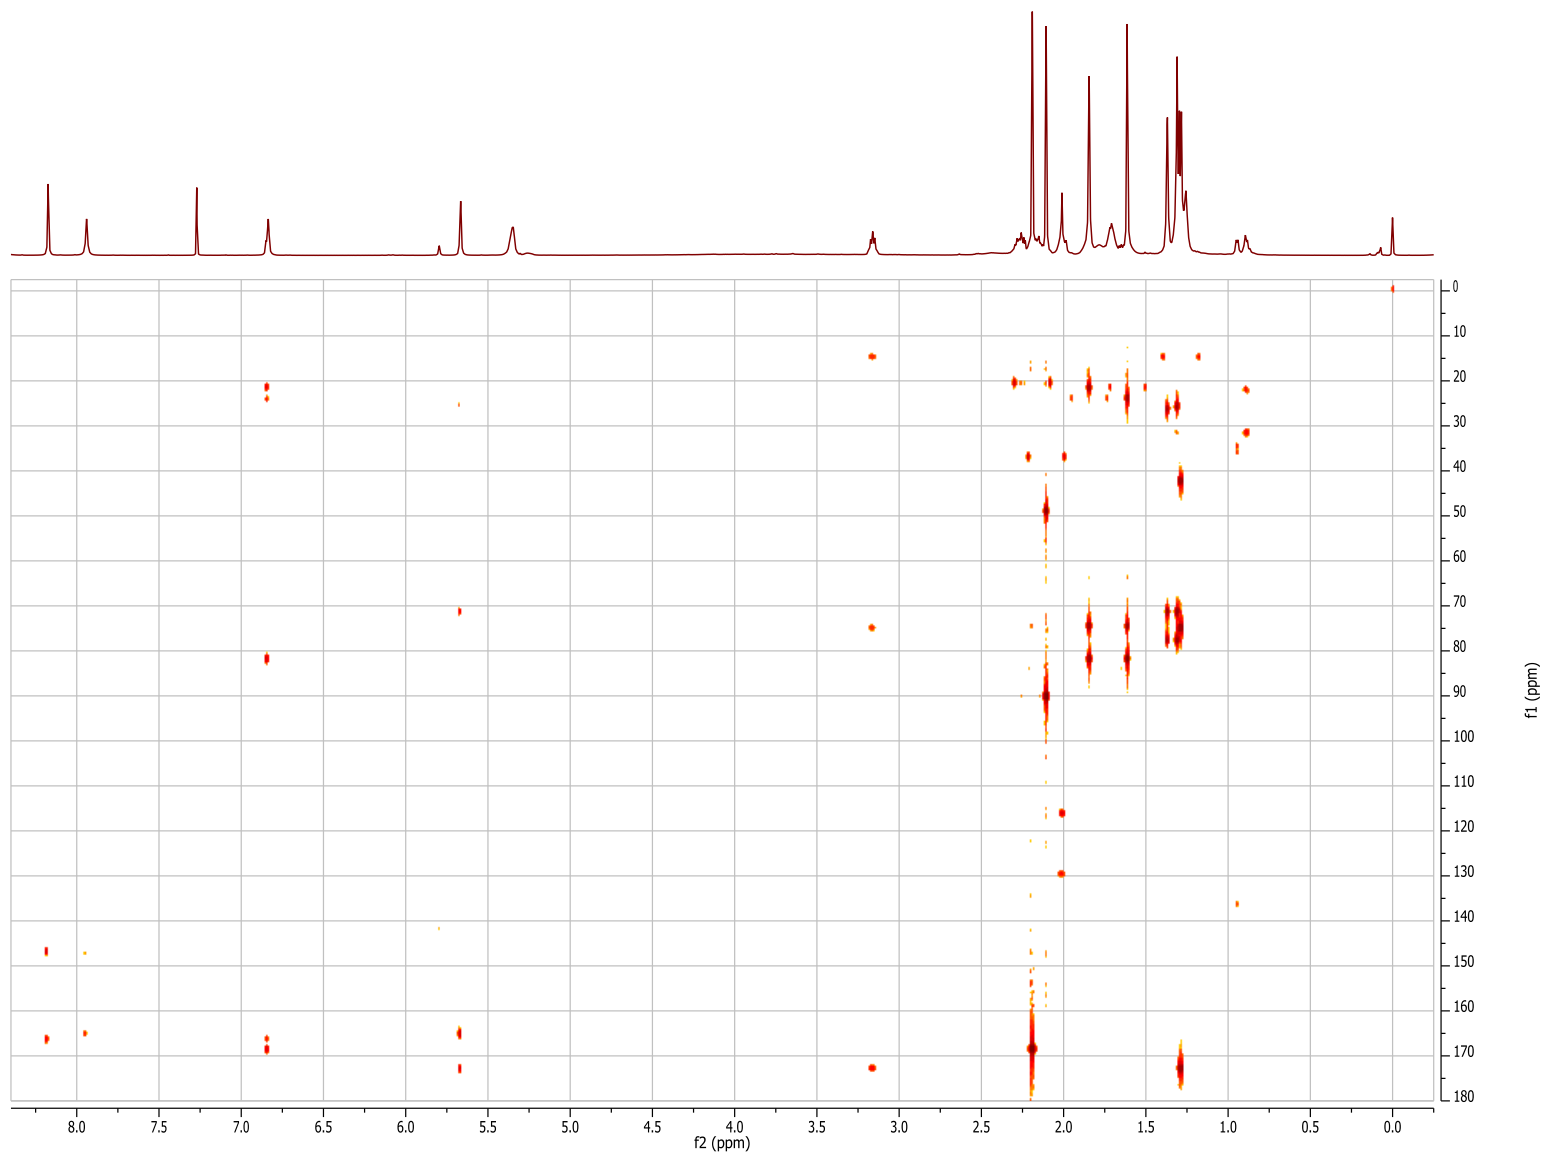

**Figure O. TOCSY-NMR (600 MHz, CDCl<sub>3</sub>) Spectrum of Hectochlorin (1).**

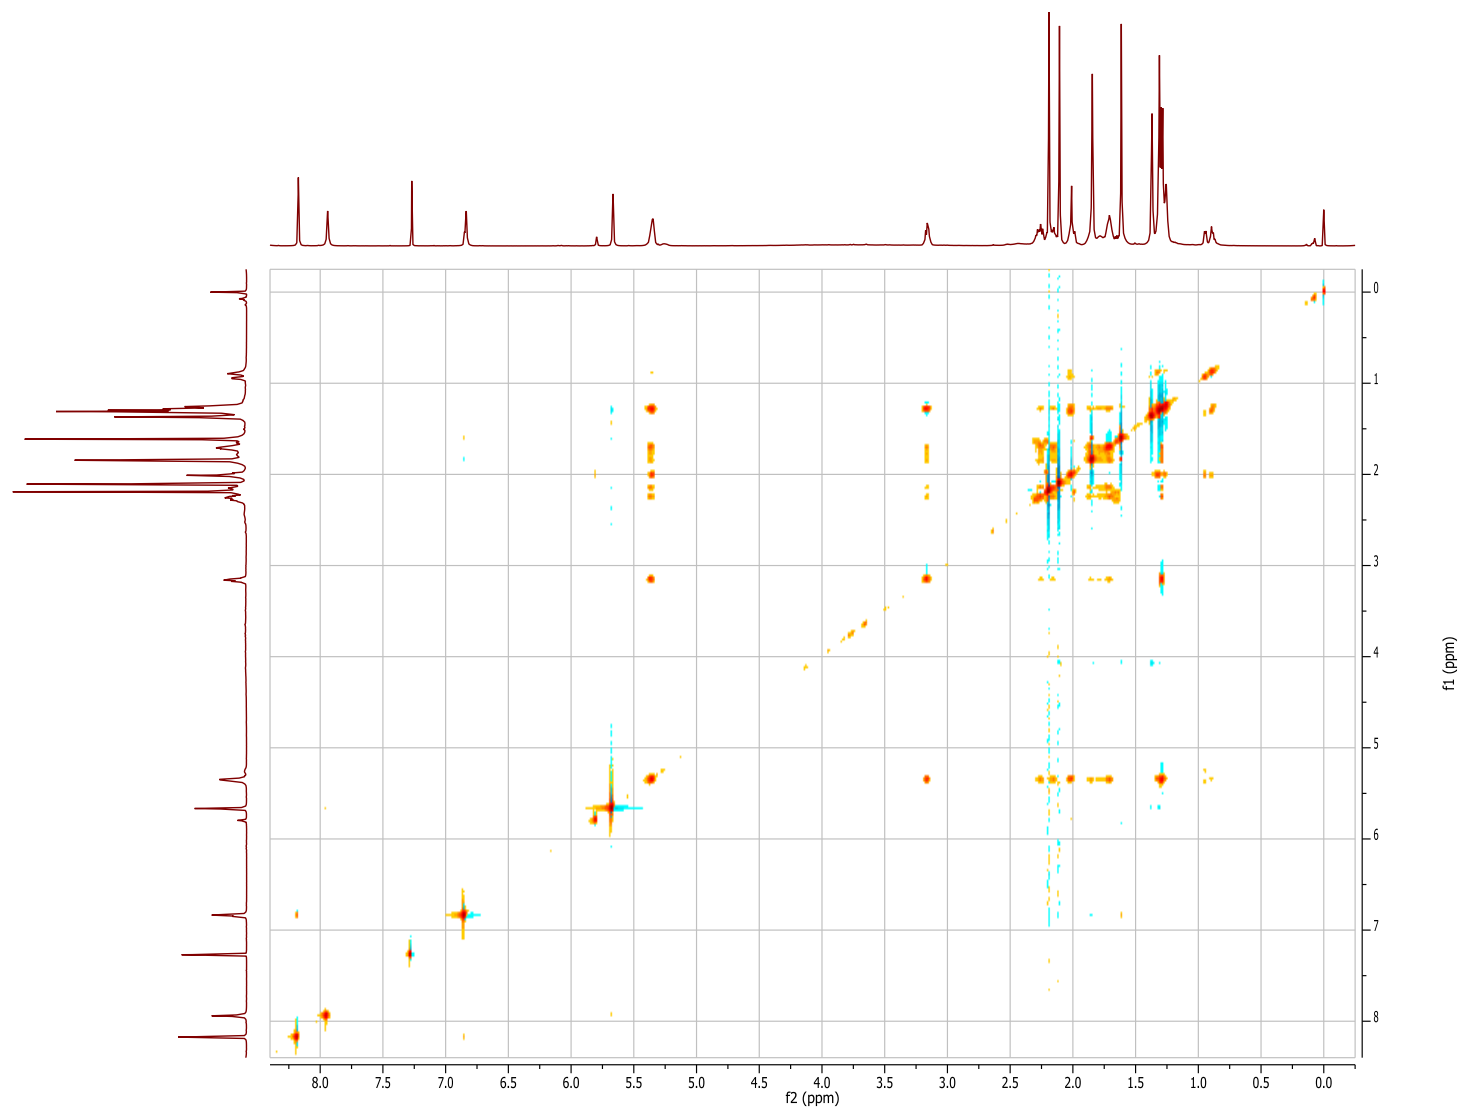

Figure P. FTMS<sup>2</sup> Fragment Spectrum of Hectochlorin (1).

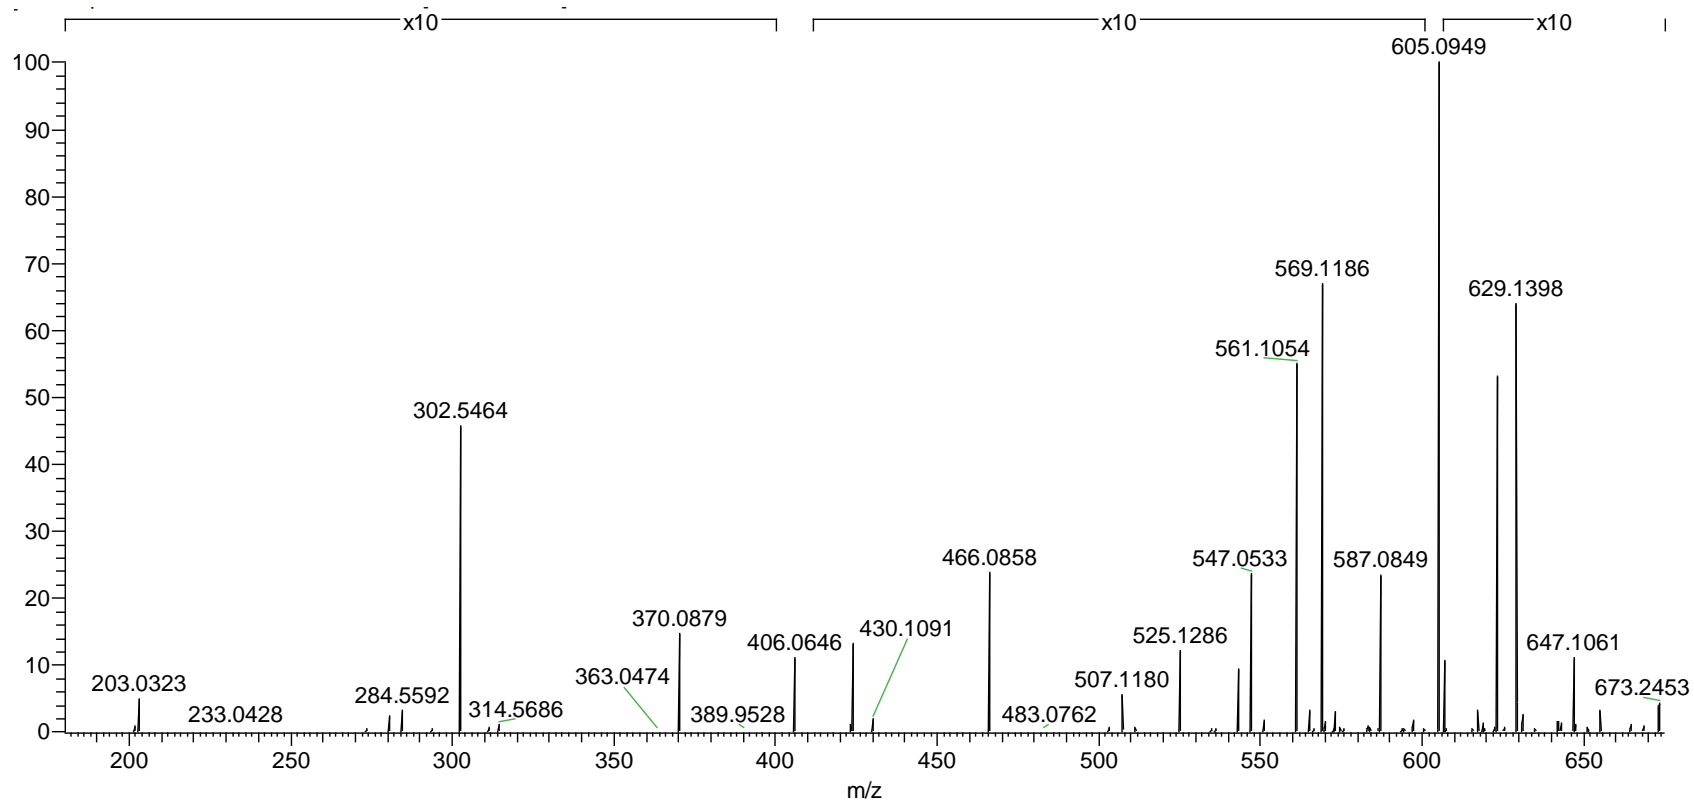

Hectochlorin (1) [M + H]<sup>+</sup>, Parent Mass 665 m/z

Figure Q. FT-MS<sup>2</sup> Fragment Summary for Hectochlorin (1).

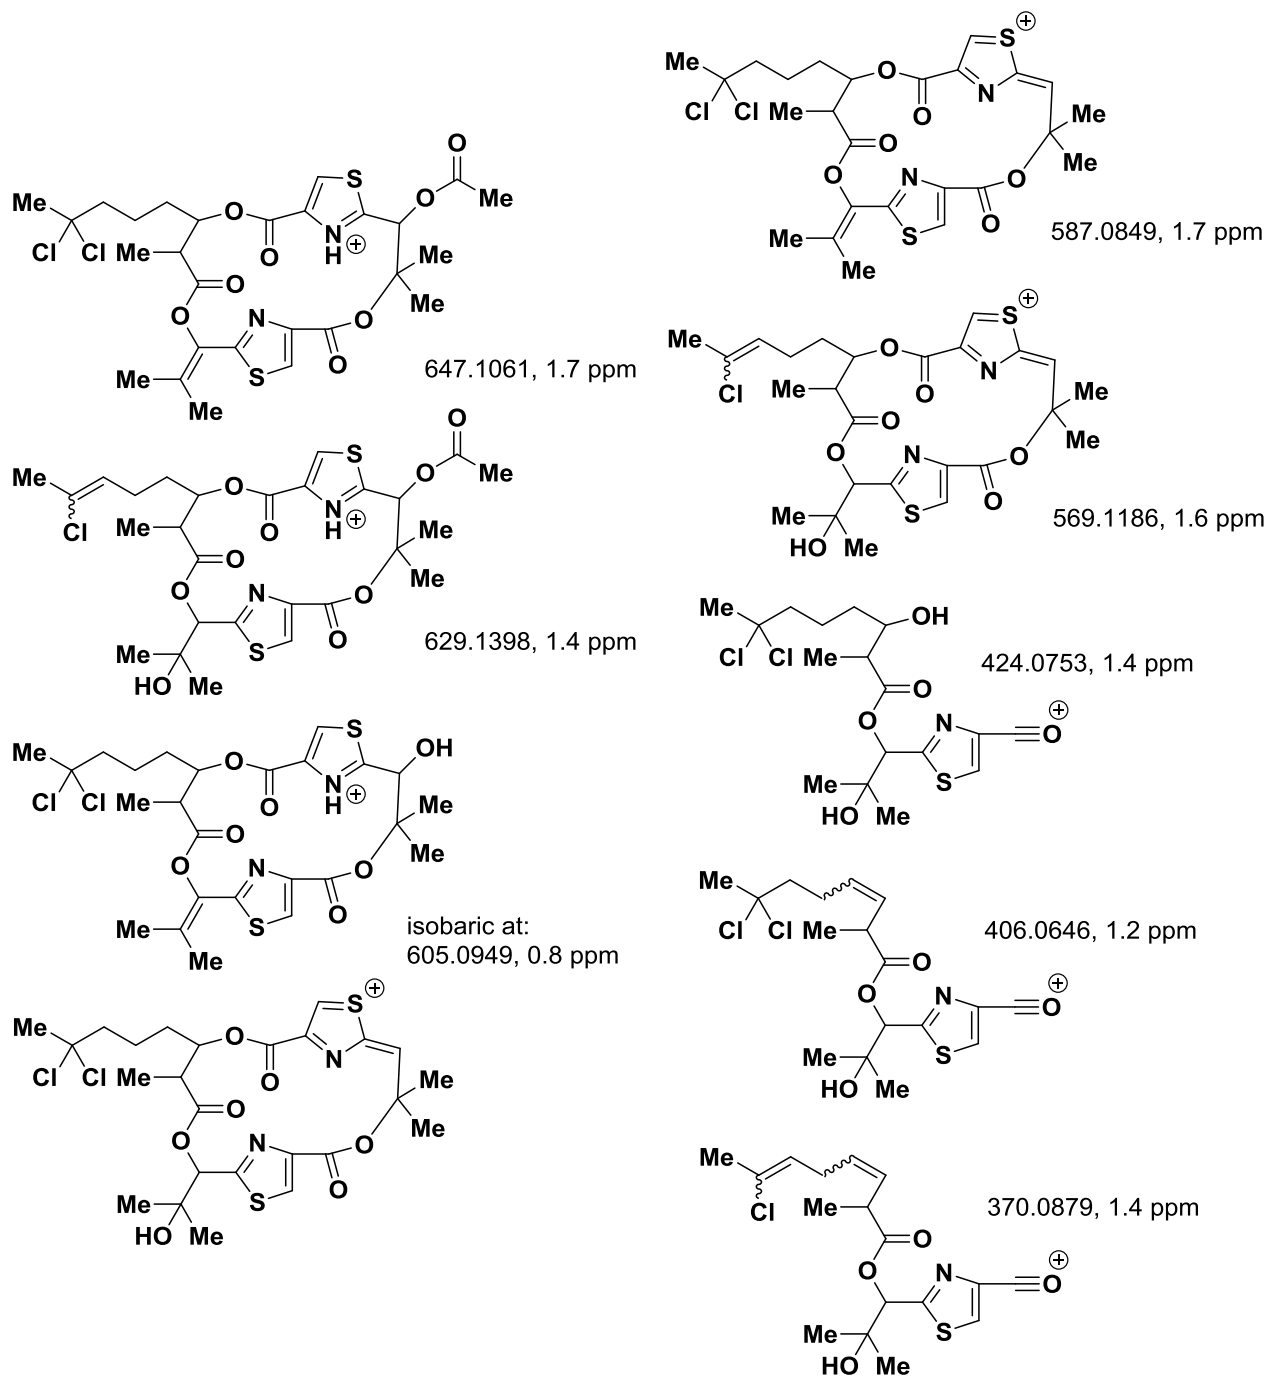

**Table R. NMR Data Summary for Hectochlorin B (5).**

| Position | $\delta_C$ , type <sup>a</sup> | $\delta_H$ ( <i>J</i> in Hz) <sup>b</sup> | HMBC <sup>b</sup>       | TOCSY <sup>b</sup> |
|----------|--------------------------------|-------------------------------------------|-------------------------|--------------------|
| 1        | 173.2, C                       | --                                        |                         |                    |
| 2        | 42.4, CH                       | 3.14, quintet (7.6)                       | 1, 3, 4 <i>weak</i> , 9 | 3, 9               |
| 3        | 74.2, CH <sub>2</sub>          | 5.32, m                                   | 2, 4 <i>weak</i>        | 2, 4-6, 9          |
| 4a       | 30.8, CH <sub>2</sub>          | 1.74, m                                   |                         | 3                  |
| 4b       | 30.8, CH <sub>2</sub>          | 1.83, m                                   |                         | 3                  |
| 5        | 20.6, CH <sub>2</sub>          | 1.73, m                                   |                         | 3, 6               |
| 6a       | 49.2, CH <sub>2</sub>          | 2.12, m                                   | 5, 7, 4, 8 <i>weak</i>  | 3, 5, 6b           |
| 6b       | 49.2, CH <sub>2</sub>          | 2.25, m                                   | 5, 7, 4, 8 <i>weak</i>  | 3, 5, 6a           |
| 7        | 90.3, C                        | --                                        |                         |                    |
| 8        | 37.2, CH <sub>3</sub>          | 2.09, s                                   | 6, 7, self              |                    |
| 9        | 14.9, CH <sub>3</sub>          | 1.28, d (7.2) <sup>c</sup>                | 1-3, self               | 2, 3               |
| 10       | 160.6, C                       |                                           |                         |                    |
| 11       | 146.3, C                       |                                           |                         |                    |
| 12       | 128.3, CH                      | 8.11, s                                   | 10, 11, 13              |                    |
| 13       | 171.4, C                       |                                           |                         |                    |
| 14       | 76.3, CH                       | 5.09, bs                                  |                         |                    |
| 15       | 85.5, C                        |                                           |                         |                    |
| 16       | 26.7, CH <sub>3</sub>          | 1.84, s                                   | 14, 15, 17              |                    |
| 17       | 22.2, CH <sub>3</sub>          | 1.77, s                                   | 14-16                   |                    |
| 18       | 162.3, C                       |                                           |                         |                    |
| 19       | 147.0, C                       |                                           |                         |                    |
| 20       | 128.5, CH                      | 8.04, s                                   | 18, 19, 21              |                    |
| 21       | 164.9, C                       |                                           |                         |                    |
| 22       | 77.2, CH                       | 5.58, s                                   | 1, 21, 23, 24           |                    |
| 23       | 71.6, C                        |                                           |                         |                    |
| 24       | 25.7, CH <sub>3</sub>          | 1.35, s                                   | 22, 23, 25              |                    |
| 25       | 26.9, CH <sub>3</sub>          | 1.28, s <sup>c</sup>                      | 22-24                   |                    |

All experiments in CDCl<sub>3</sub> with TMS standard, 1% v/v for <sup>13</sup>C experiment, and 0.3% v/v for the rest. <sup>a</sup>Carbon chemical shifts from 2D-NMR experiment extraction. <sup>b</sup>Spectra collected on a Bruker 600 MHz (600 MHz and 150 MHz for the <sup>1</sup>H and <sup>13</sup>C nuclei, respectively) with 1.7 mm inverse cryo-probe. <sup>c</sup>Proton species overlapped, shift and coupling extracted from the HSQC.

Figure S.  $^1\text{H-NMR}$  (600 MHz,  $\text{CDCl}_3$ ) Spectrum of Hectochlorin B (5).

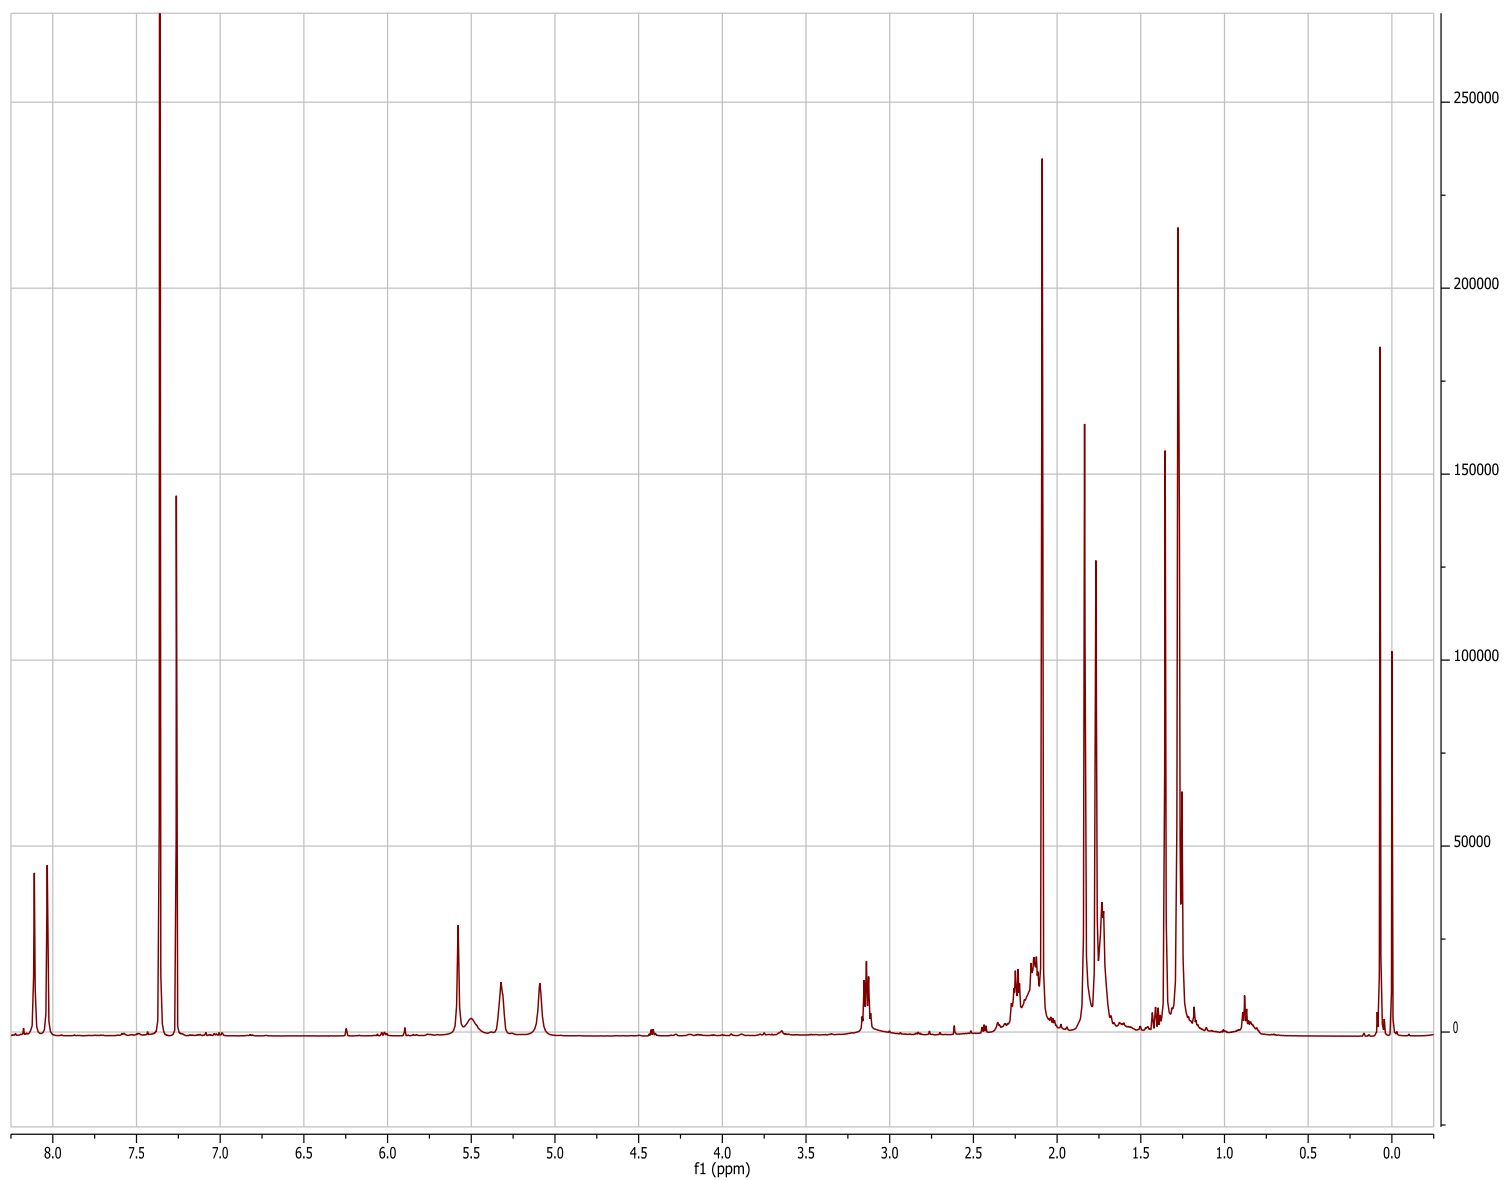

Figure T.  $^{13}\text{C}$ -NMR (125 MHz,  $\text{CDCl}_3$ ) Spectrum of Hectochlorin B (5).

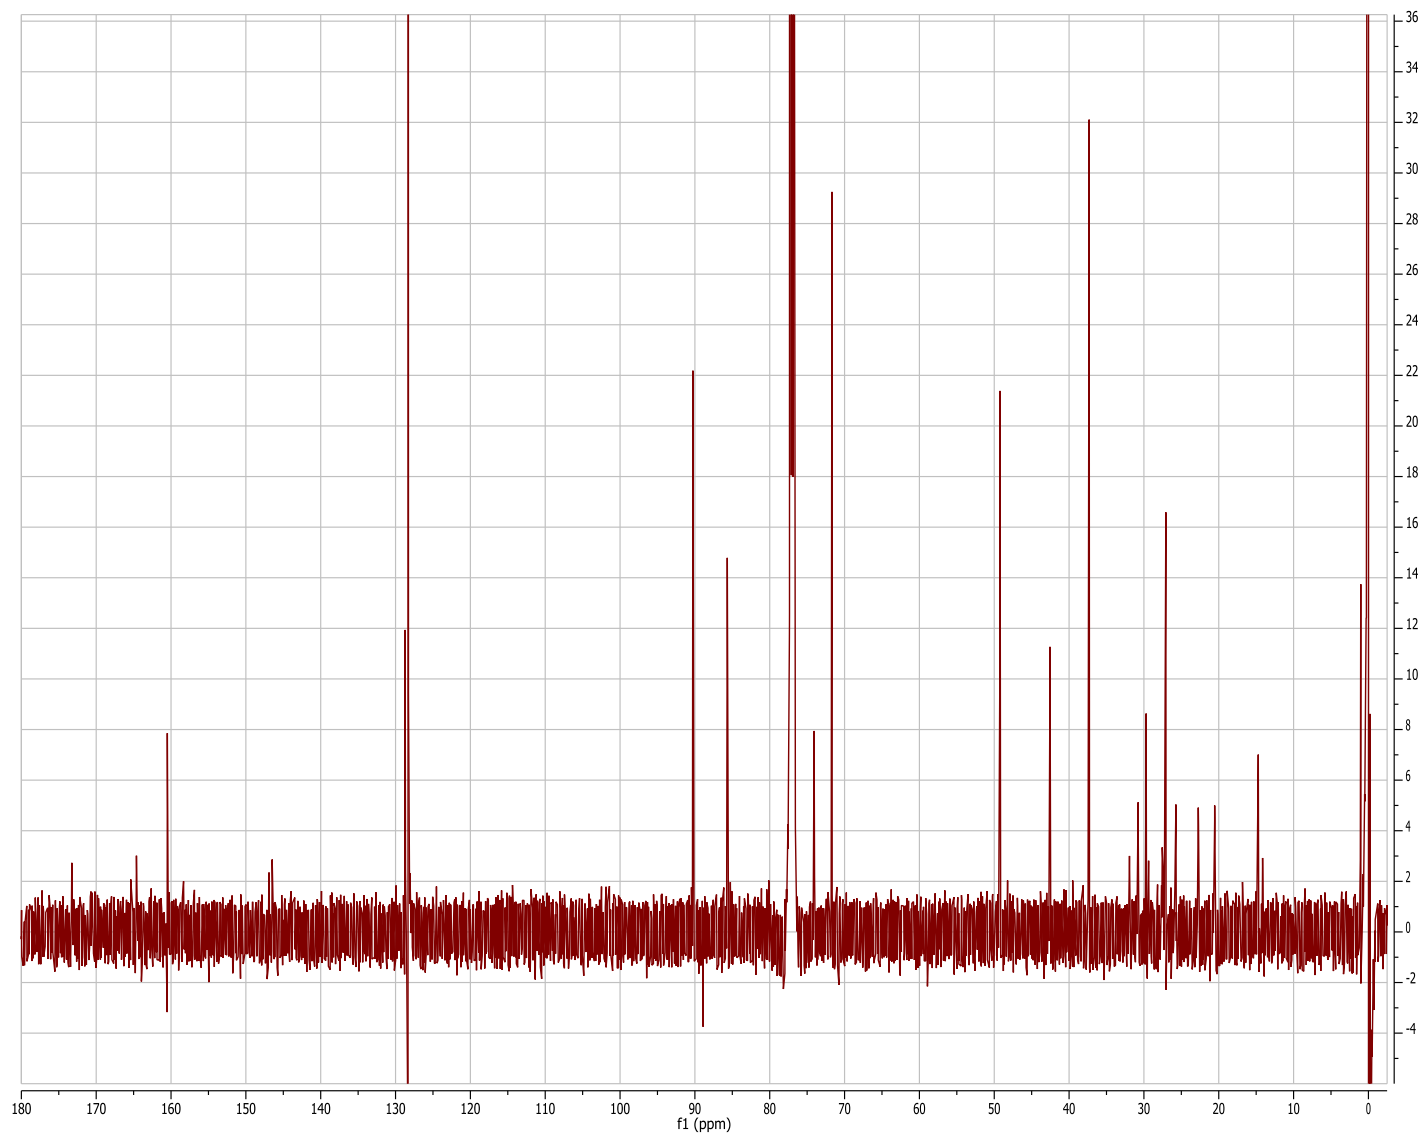

Benzene contamination at 128.3 ppm.

**Figure U. HSQC-NMR (600 MHz, CDCl<sub>3</sub>) Spectrum of Hectochlorin B (5).**

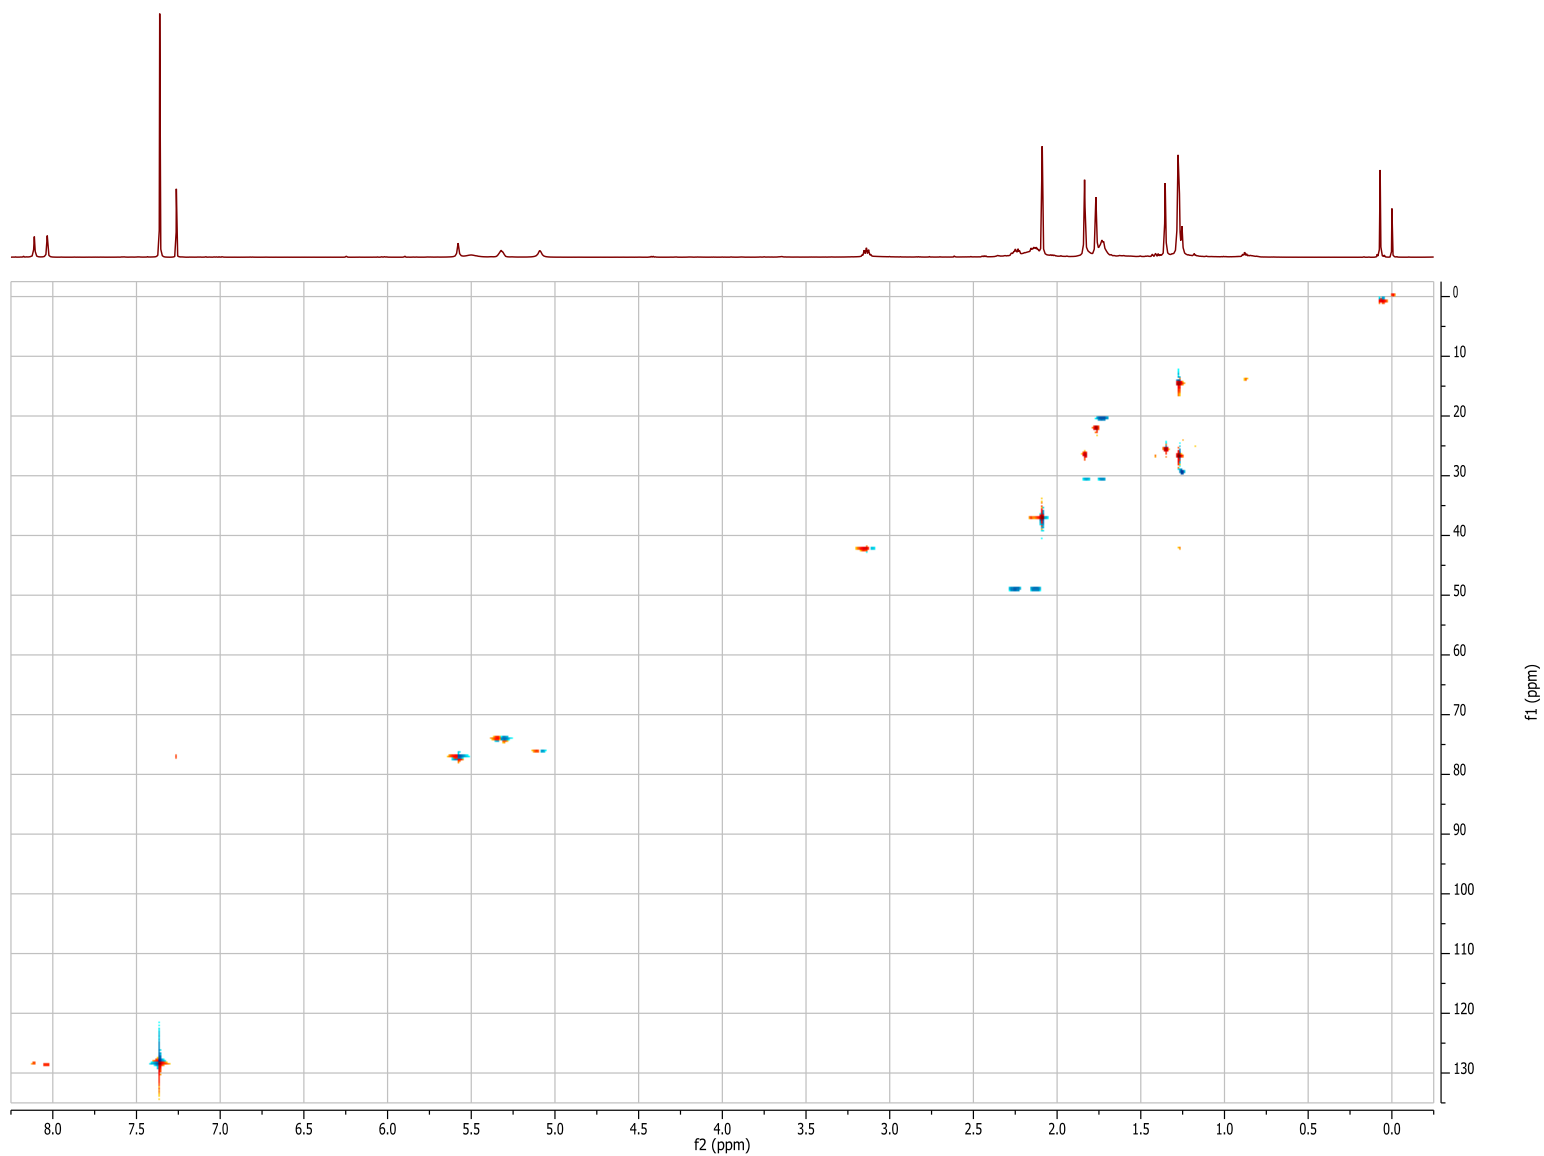



**Figure V. HMBC-NMR (600 MHz, CDCl<sub>3</sub>) Spectrum of Hectochlorin B (5).**

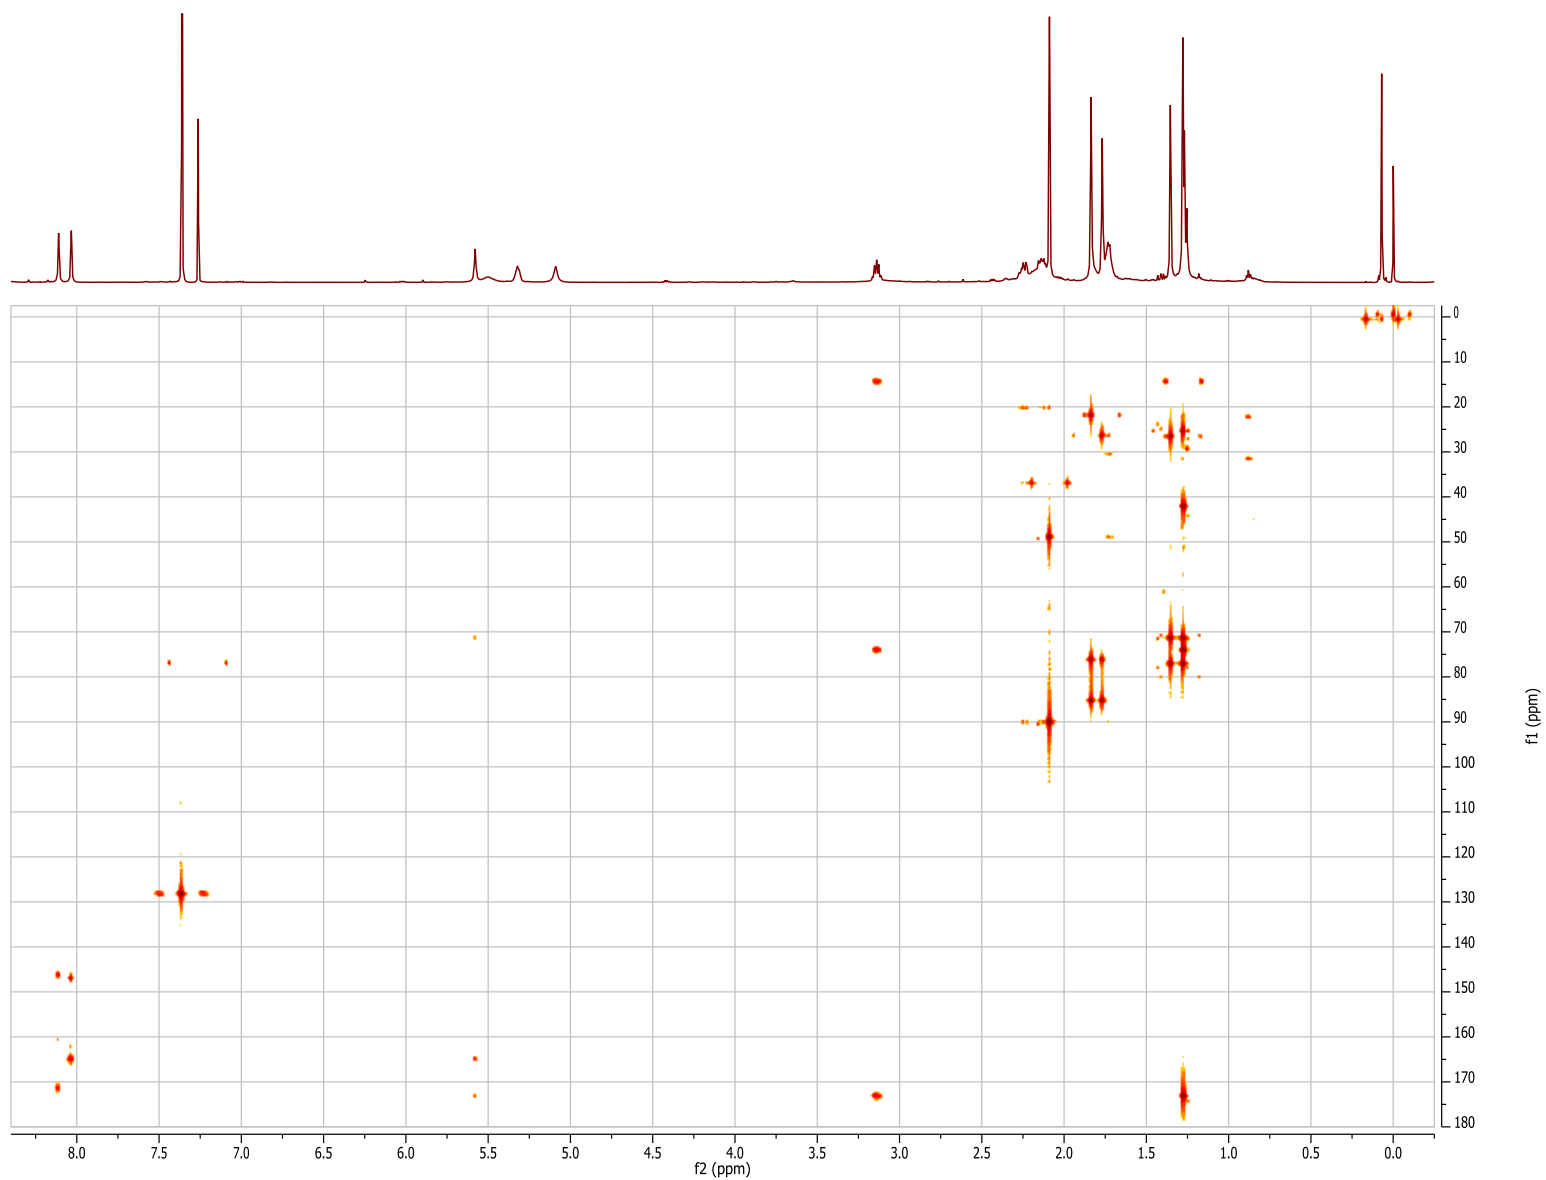

Figure W. TOCSY-NMR (600 MHz, CDCl<sub>3</sub>) Spectrum of Hectochlorin B (5).

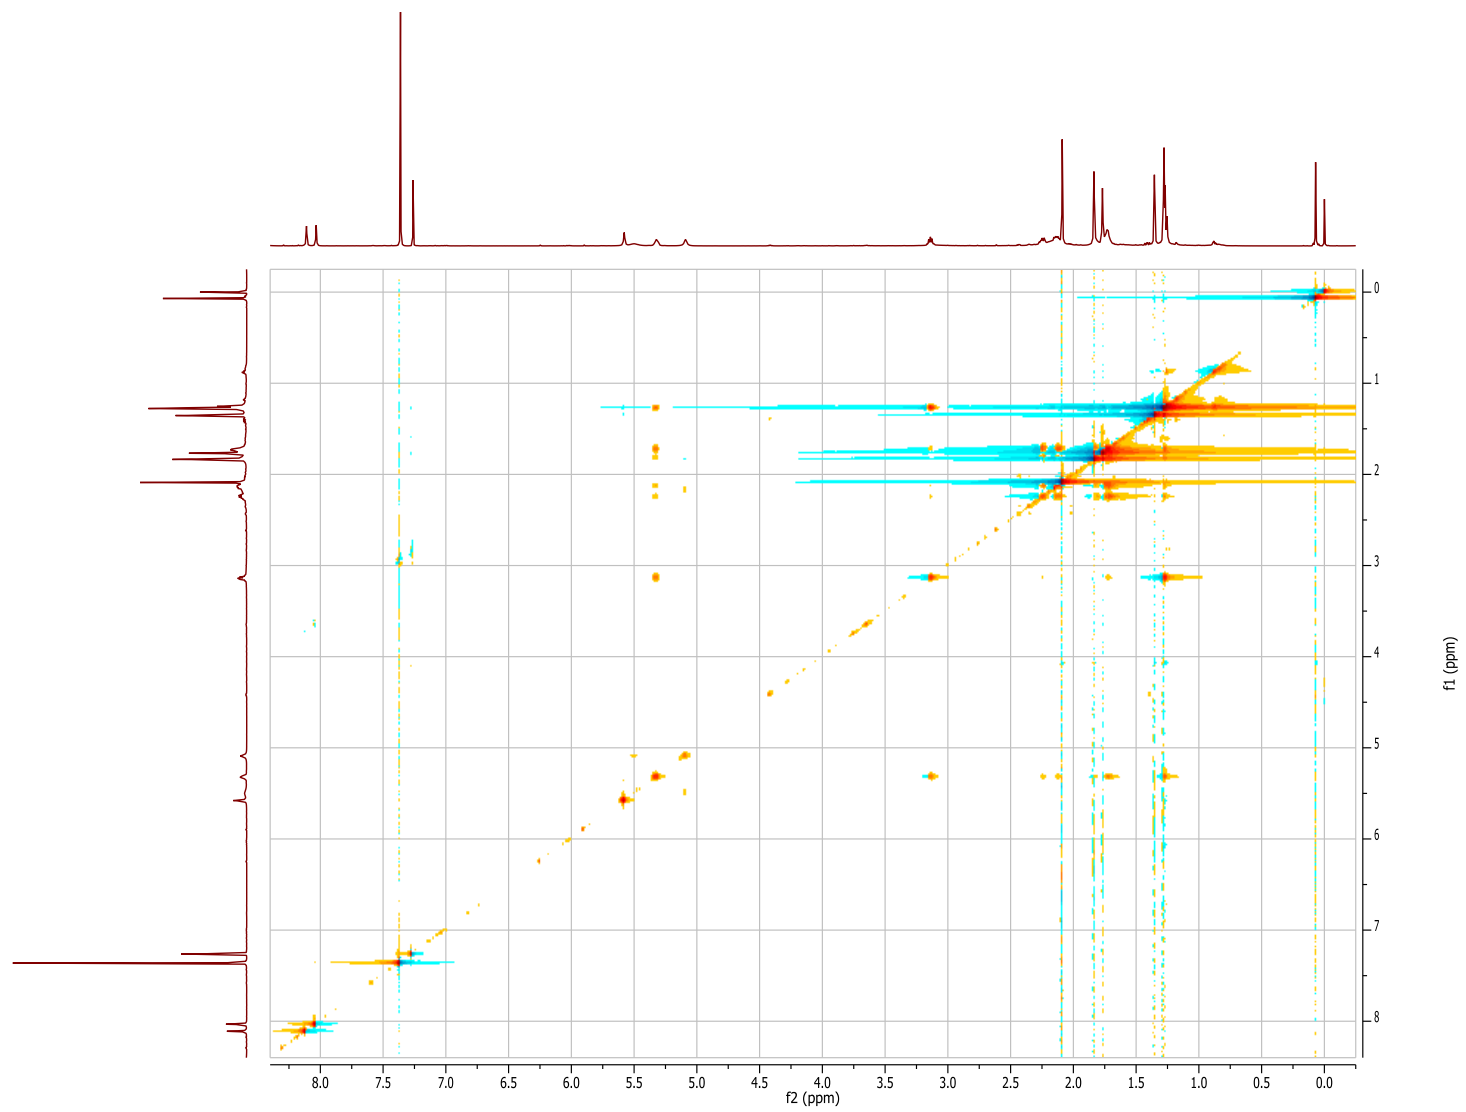

**Figure X. FTMS<sup>2</sup> Fragment Spectrum of Hectochlorin B (5).**

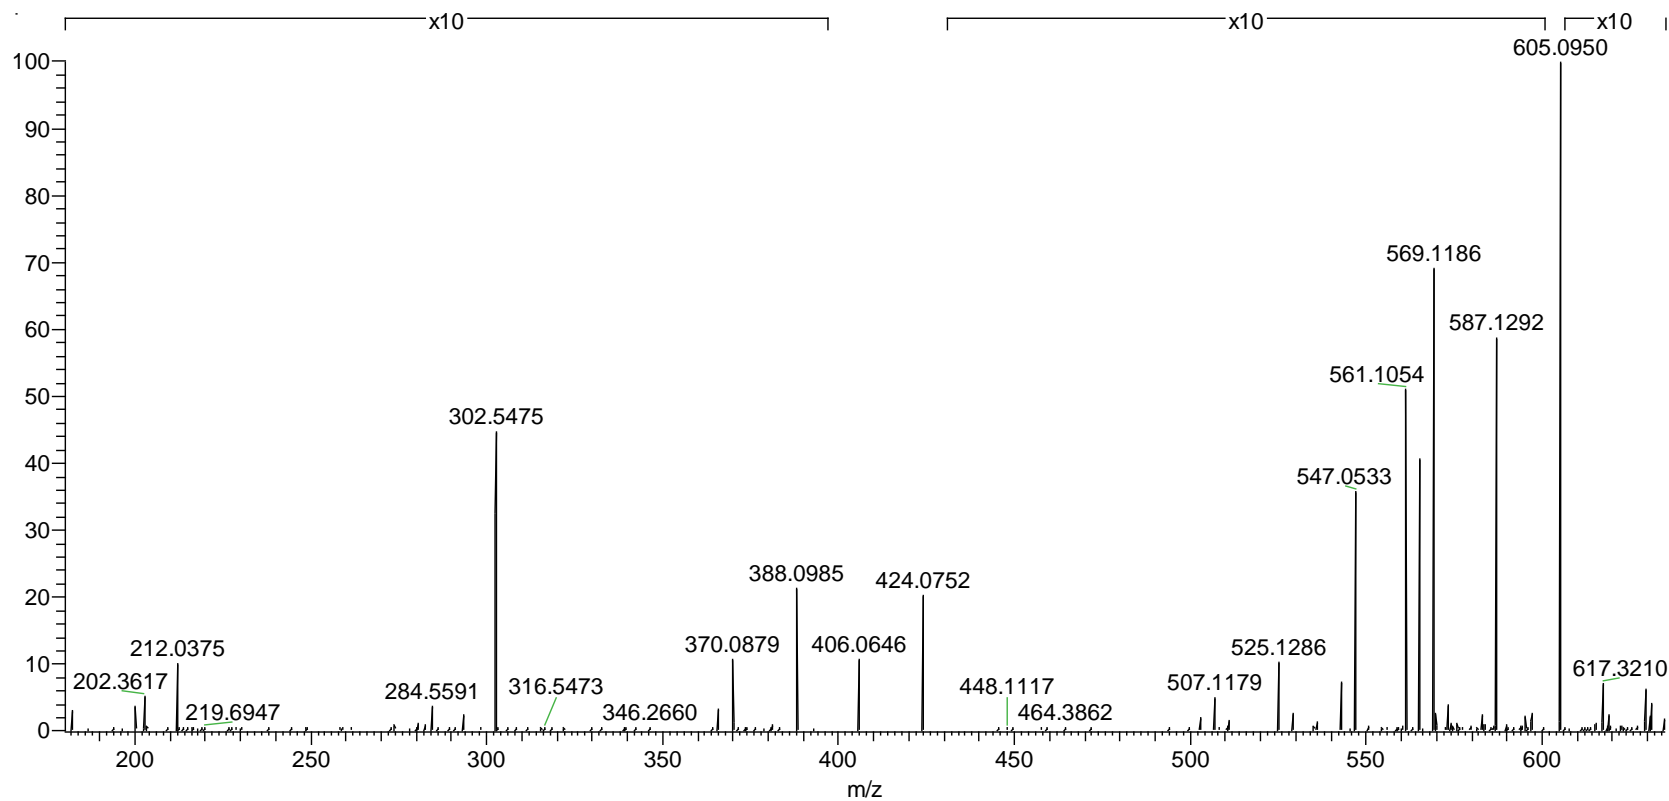

Hectochlorin B (5) [M + H]<sup>+</sup>, Parent Mass 623 m/z

Figure Y. FT-MS<sup>2</sup> Fragment Summary for Hectochlorin B (5).

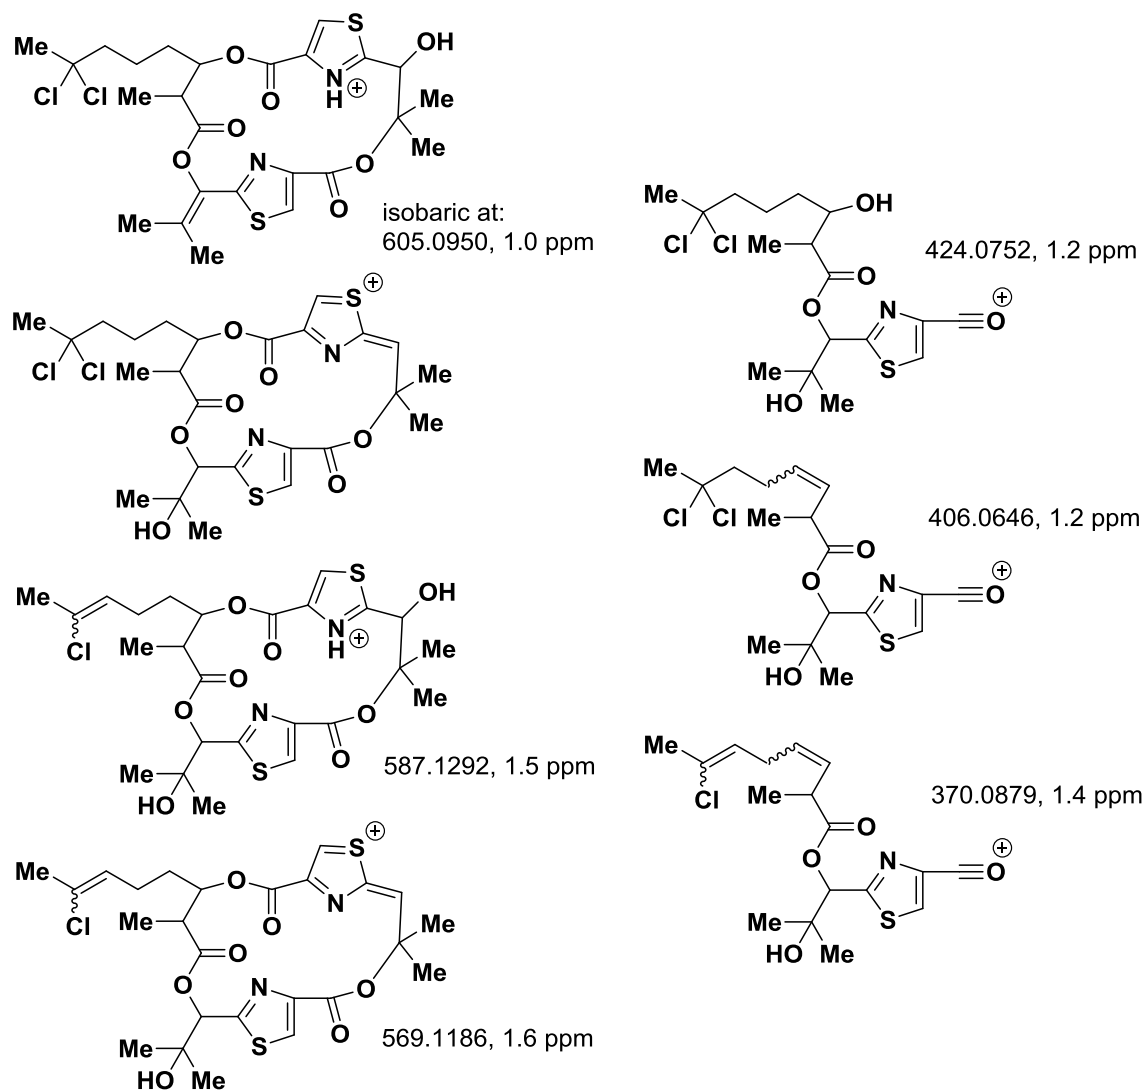

Figure Z. FTMS<sup>2</sup> Fragment Spectrum for Hectochlorin C (6).

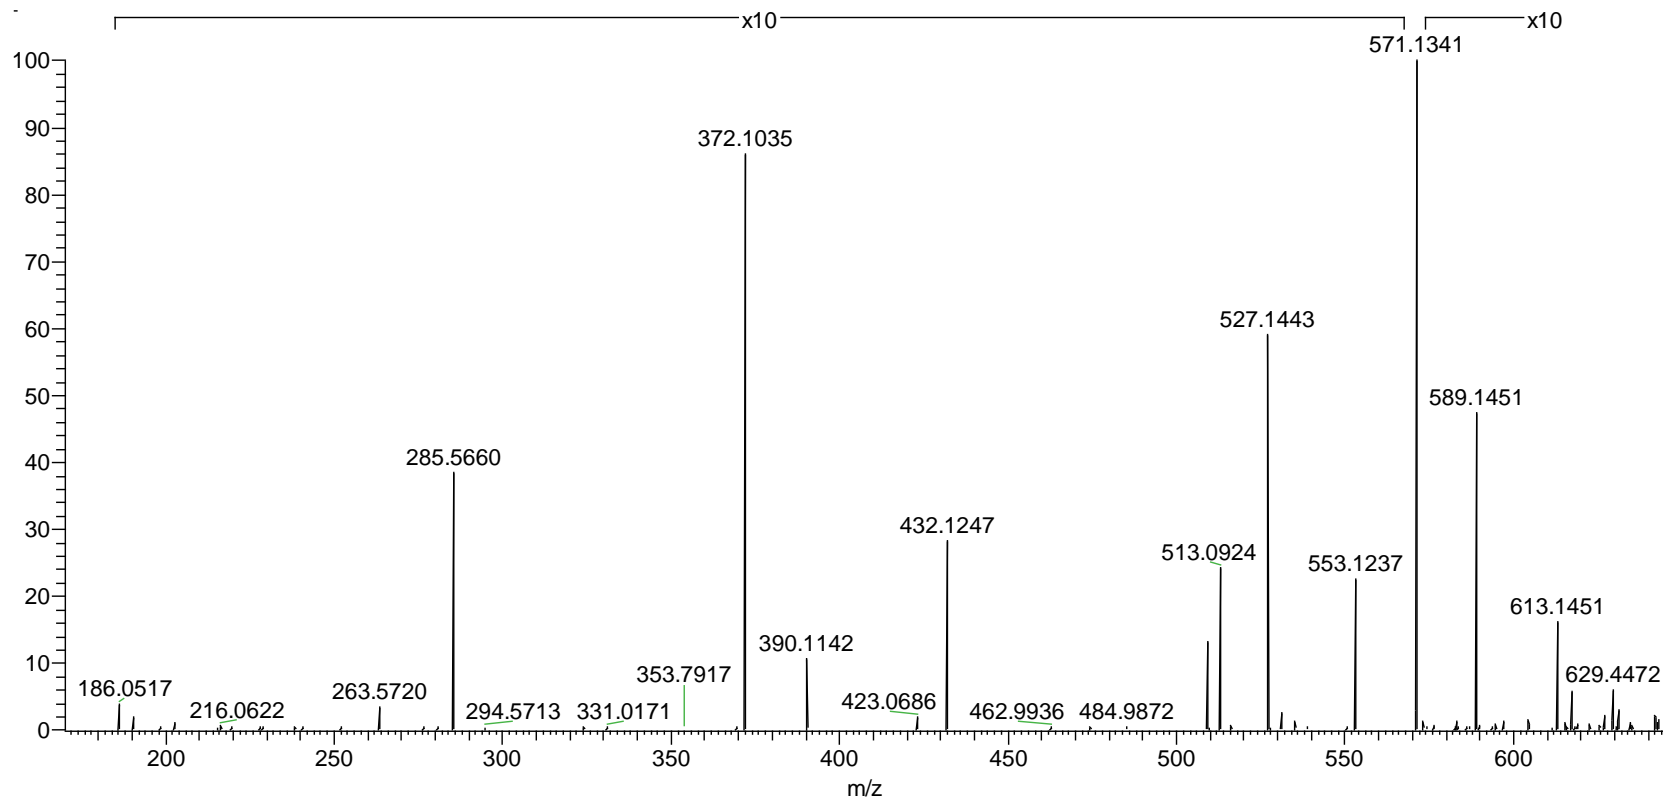

Hectochlorin C (6) [M + H]<sup>+</sup>, Parent Mass 631 m/z

Figure AA. FTMS<sup>2</sup> Fragment Summary for Hectochlorin C (6).

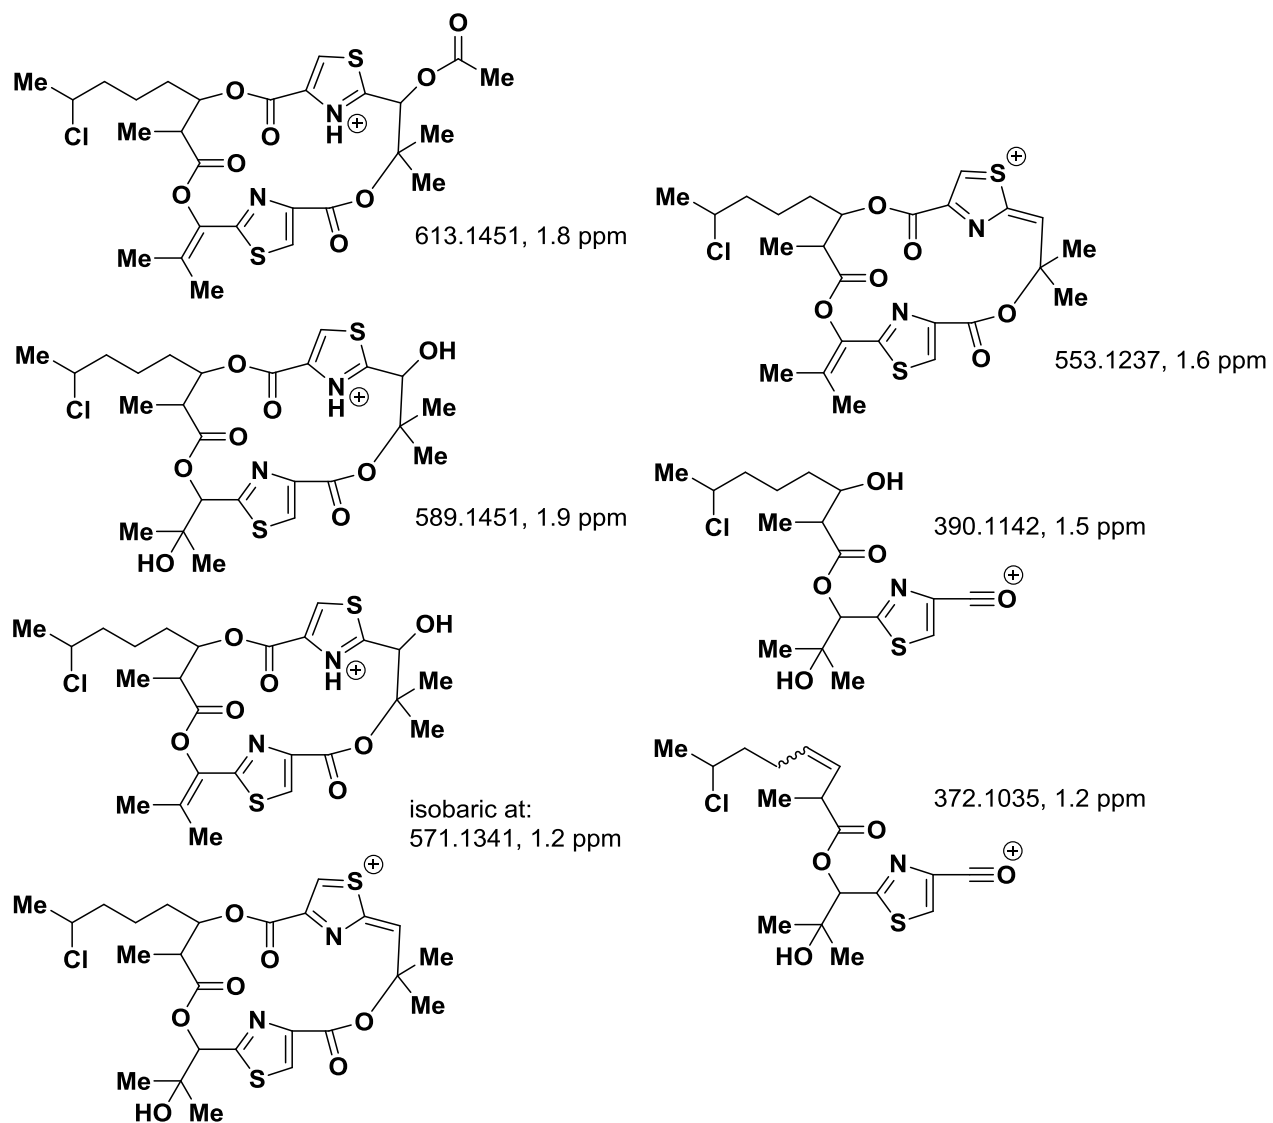

Figure AB. FTMS<sup>2</sup> Fragment Spectrum for Hectochlorin D (7).

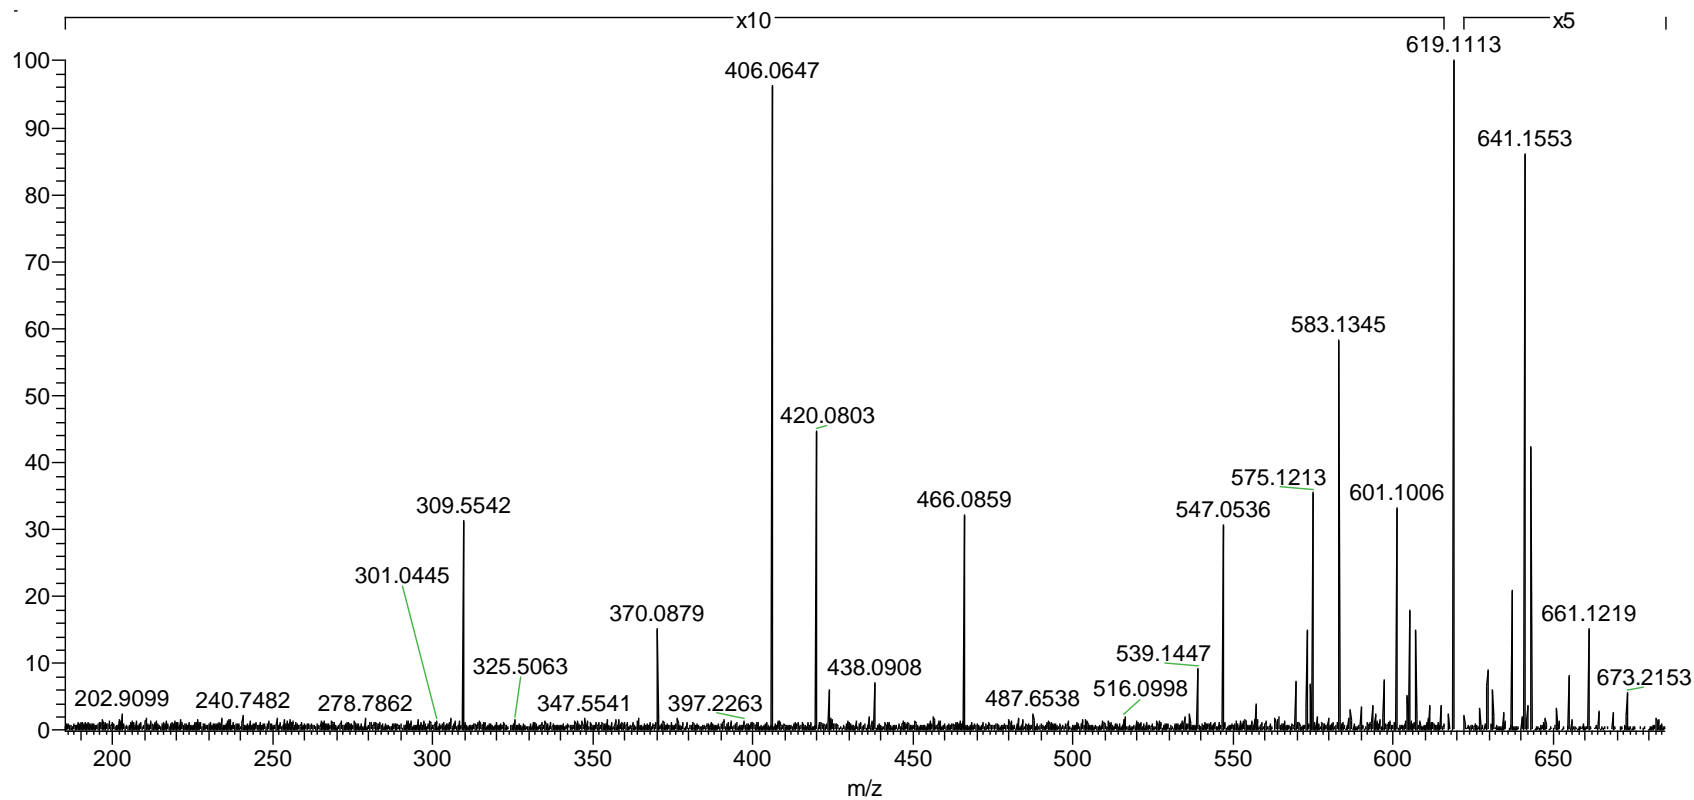

Hectochlorin D (7) [M + H]<sup>+</sup>, Parent Mass 679 m/z

Figure AC. FTMS<sup>2</sup> Fragment Summary for Hectochlorin D (7).

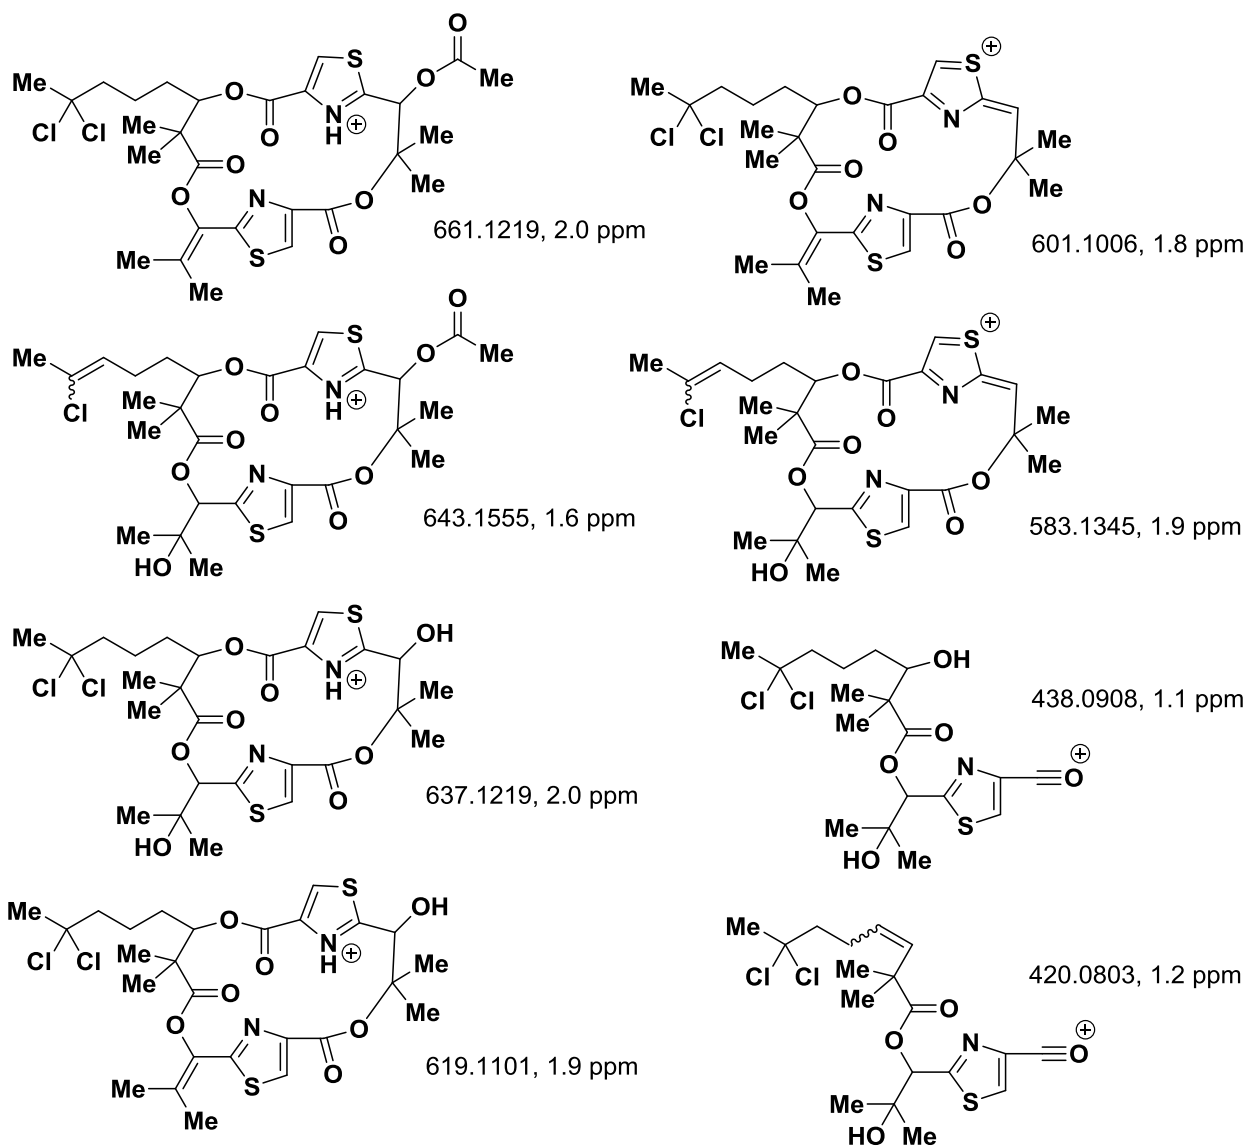



**Figure AD. Proposed Biosynthetic Pathway Divergence for Jamaicamide A and D (2 and 8).**

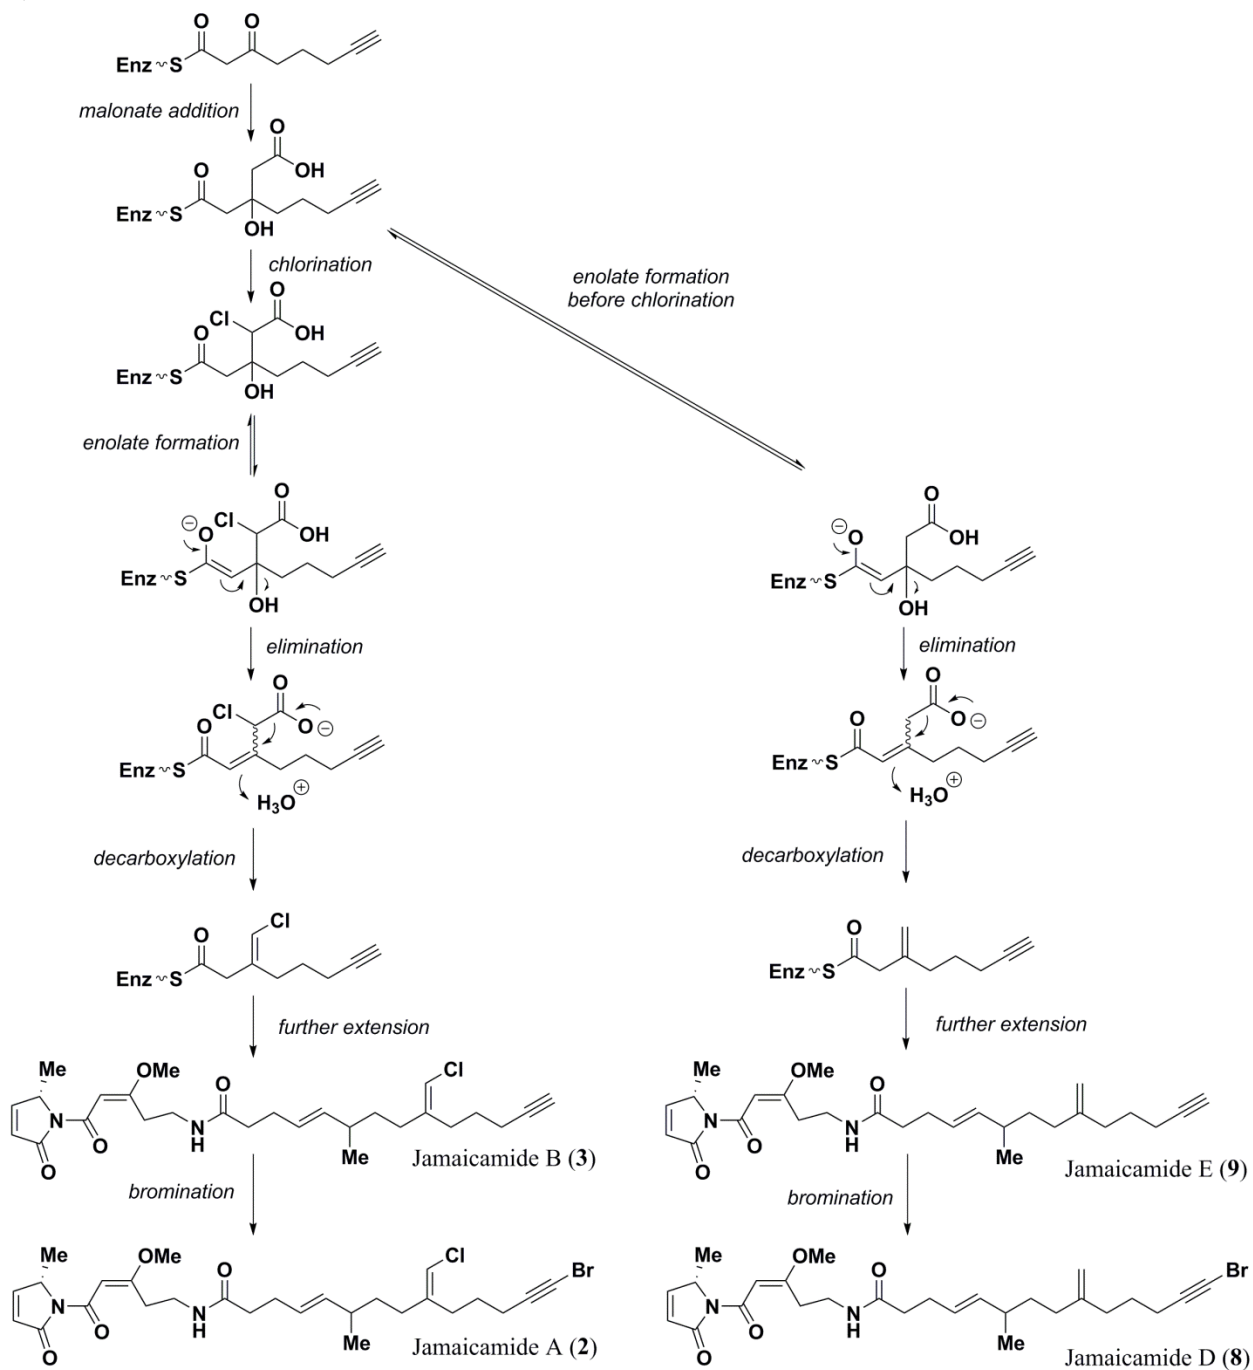

**Table AE. NMR Data Summary for Jamaicamide D (8).**

| Position | $\delta_C^a$ | $\delta_H$ (J in Hz)      | HMBC   | TOCSY           |
|----------|--------------|---------------------------|--------|-----------------|
| 1        |              | 1.50 <sup>b</sup>         |        | 3               |
| 2        |              | --                        |        |                 |
| 3        |              | 2.20, t (7.1)             |        | 1, 4, 5         |
| 4        |              | 1.60-1.66, m              |        | 3, 5            |
| 5        |              | 2.06-2.10, m              |        | 3, 4            |
| 6        |              | --                        |        |                 |
| 7        |              | 2.01-2.05, m              |        | 8, 26           |
| 8        | 34.9         | 1.29-1.40, m              |        | 7, 9, 26        |
| 9        | 36.6         | 1.91-1.95, m              |        | 8, 26           |
| 10       | 137.1        | 5.26-5.39, m <sup>c</sup> |        | 12, 13, 26      |
| 11       |              | 5.26-5.39, m <sup>c</sup> |        | 12, 13, 26      |
| 12       |              | 2.26-2.30, m              |        | 10, 11, 13a     |
| 13a      |              | 2.17-2.20, m              |        | 10, 11, 12, 13b |
| 13b      |              | 2.26-2.30, m              |        | 10, 11, 13a     |
| 14       |              | --                        |        |                 |
| NH       |              | 6.69, bs                  |        | 15              |
| 15       |              | 3.47-3.54, m              |        | 16, NH          |
| 16a      |              | 2.81-2.86, m              |        | 15, 16b         |
| 16b      |              | 2.98-3.51, m              |        | 15, 16a         |
| 17       | 175.6        | --                        |        |                 |
| 18       |              | 6.73, s                   |        |                 |
| 19       |              | --                        |        |                 |
| 20       |              | --                        |        |                 |
| 21       |              | 6.08, dd (1.4, 6.0)       |        | 22              |
| 22       | 153.1        | 7.23, dd (2.0, 5.9)       |        | 21, 24          |
| 23       | 58.2         | 4.86, q (6.7)             |        | 24              |
| 24       |              | 1.46, d (6.7)             | 22, 23 | 22, 23          |
| 25       |              | 3.75, s                   | 17     |                 |
| 26       |              | 0.95, d (6.7)             | 8-10   | 7-11            |
| 27       |              | 4.70, m                   |        |                 |

All experiments in CDCl<sub>3</sub> with 0.3% v/v TMS standard, on a Varian Unity 500 MHz (500 MHz and 125 MHz for the <sup>1</sup>H and <sup>13</sup>C nuclei respectively). <sup>a</sup>Carbon chemical shifts by projection from HMBC experiment.

<sup>b</sup>Overlapping with water peak, shift determined by TOCY correlation. <sup>c</sup>Proton species overlapped.

Figure AF.  $^1\text{H-NMR}$  (500 MHz,  $\text{CDCl}_3$ ) Spectrum of Jamaicamide D (8).

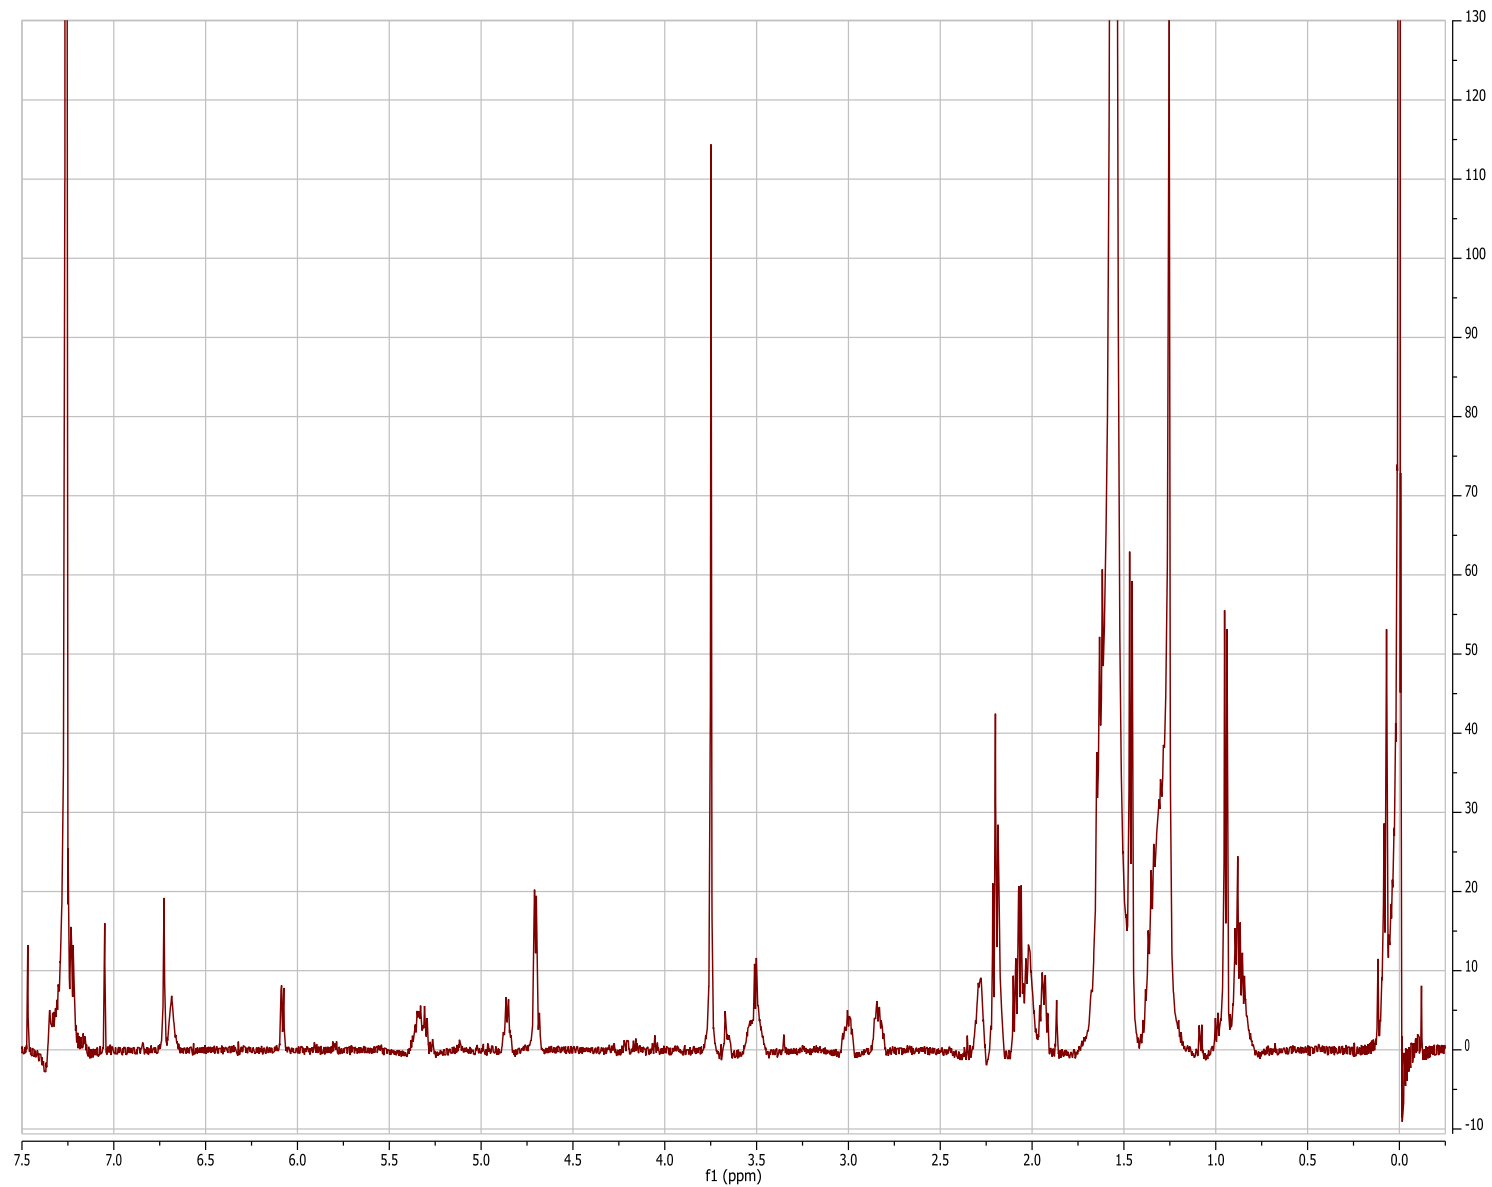

**Figure AG. HMBC-NMR (500 MHz, CDCl<sub>3</sub>) Spectrum of Jamaicamide D (8).**

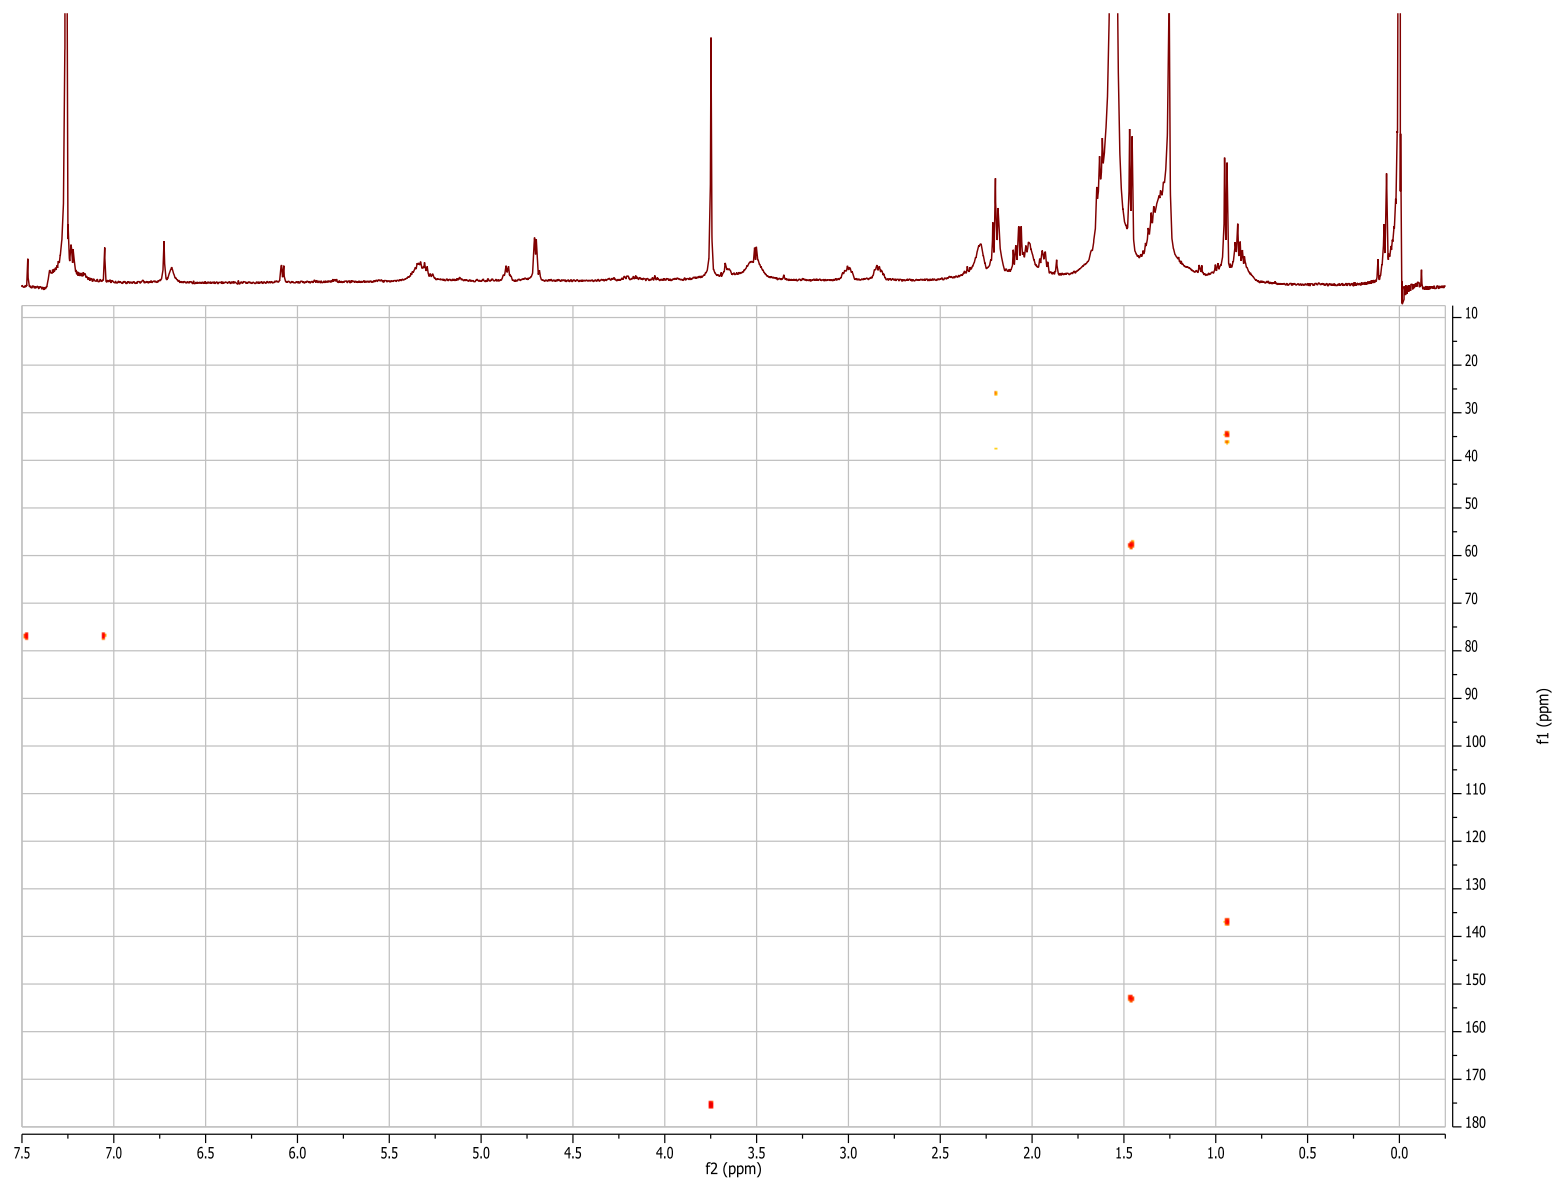

**Figure AH. TOCSY-NMR (500 MHz, CDCl<sub>3</sub>) Spectrum of Jamaicamide D (8).**

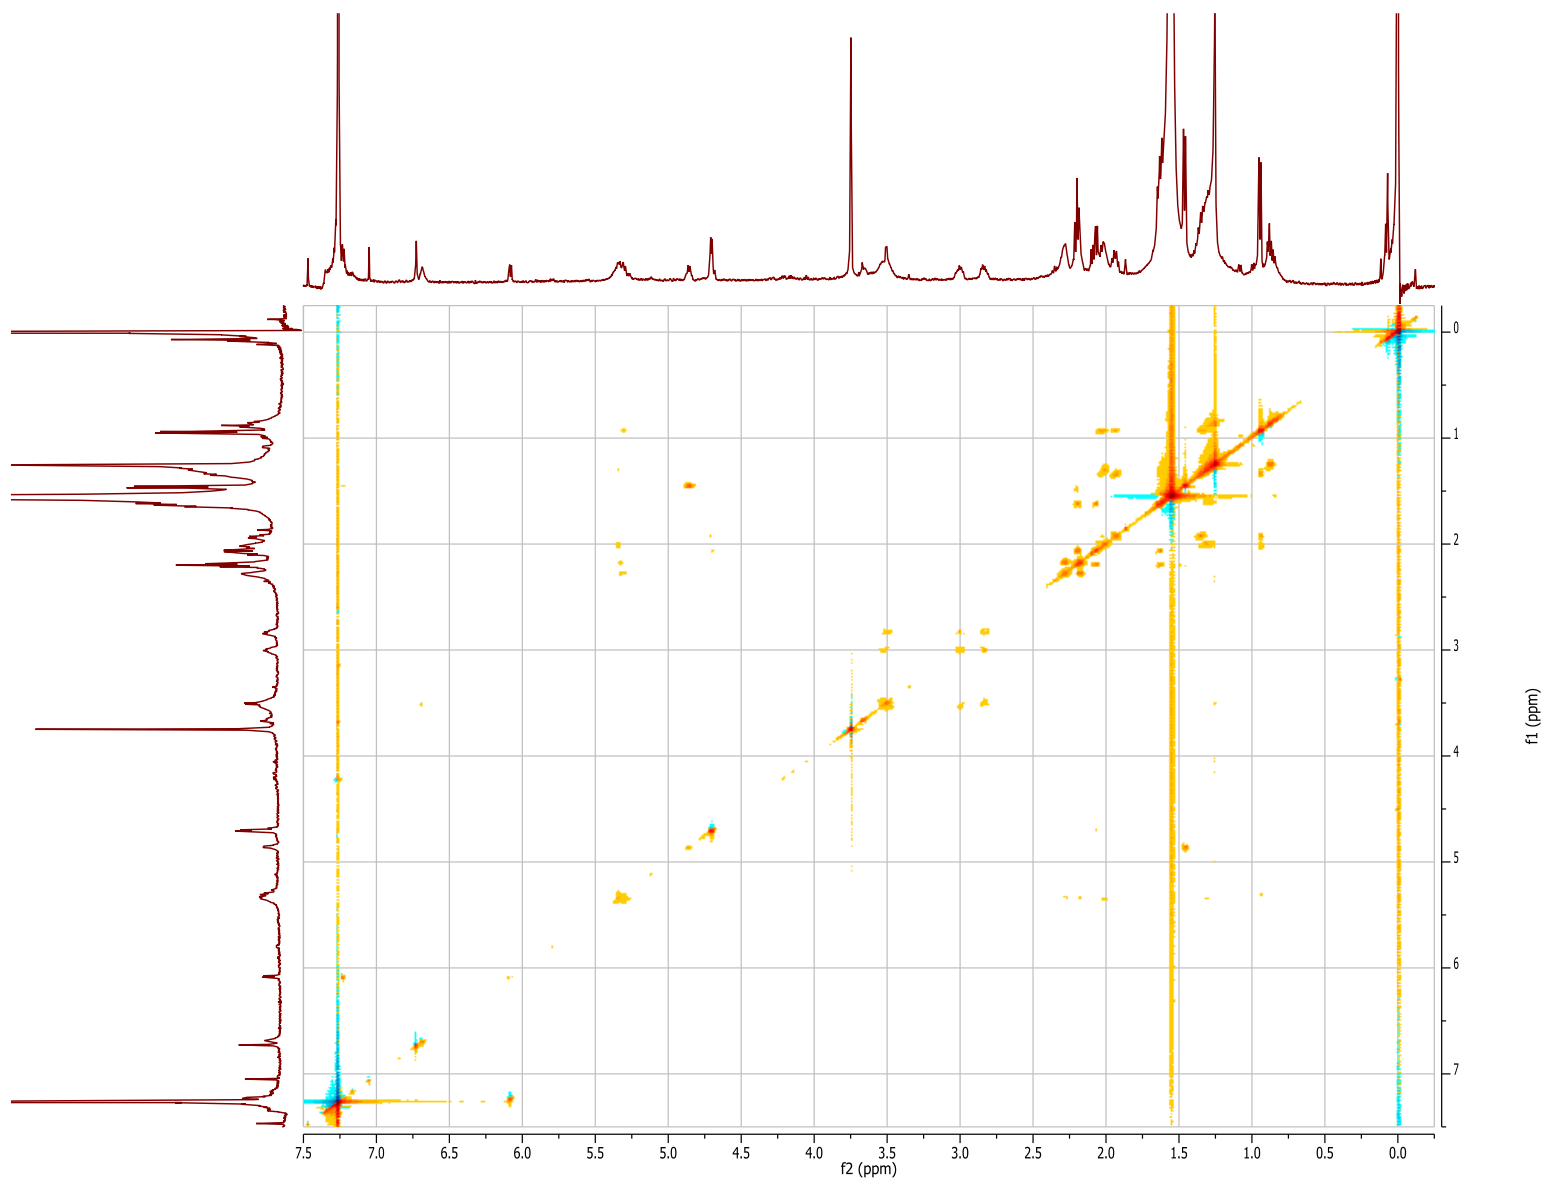

**Table AI. NMR Data Summary for Jamaicamide F (12).**

| Position | $\delta_C$ , type <sup>a</sup> | $\delta_H$ (J in Hz) <sup>b</sup> | HMBC <sup>b</sup>               | TOCSY <sup>b</sup> |
|----------|--------------------------------|-----------------------------------|---------------------------------|--------------------|
| 1        | -6.6, C                        | --                                |                                 |                    |
| 2        | 94.2, C                        | --                                |                                 |                    |
| 3        | 20.7, CH <sub>2</sub>          | 2.36, t (7.2)                     | 1, 2, 4, 5, self                | 4, 5               |
| 4        | 26.1, CH <sub>2</sub>          | 1.64, quin (7.1)                  | 2, 3, 5, 6, self                | 3, 5               |
| 5        | 29.2, CH <sub>2</sub>          | 2.25, <sup>ac</sup> m             | 3, 4, 6, 7, 27                  | 3, 4               |
| 6        | 141.8, C                       | --                                |                                 |                    |
| 7        | 32.6, CH <sub>2</sub>          | 2.00, <sup>bd</sup> m             | 5, 6, 8, 9, 27                  | 8, 26              |
| 8        | 34.7, CH <sub>2</sub>          | 1.34, <sup>ce</sup> m             | 6, 10, 9, 7, 26                 | 7, 9, 26           |
| 9        | 36.3, CH                       | 2.02, <sup>bd</sup> m             | 7, 10, 11, 26                   | 8, 26              |
| 10       | 136.6, CH                      | 5.27, dd (7.7, 15.4)              | 8, 9, 11, 12, 26, self          | 9, 11, 12, 13a, 26 |
| 11       | 127.5, CH                      | 5.36, td (6.5, 15.2)              | 9, 10, 12                       | 9, 10, 12, 13a, 26 |
| 12       | 28.6, CH <sub>2</sub>          | 2.29, <sup>ac</sup> m             |                                 | 10, 11, 13a        |
| 13a      | 36.8, CH <sub>2</sub>          | 2.18, t (7.6)                     | 11, 12, 14                      | 10, 11, 12, 13b    |
| 13b      | 36.8, CH <sub>2</sub>          | 2.29, <sup>ac</sup> m             | 10, 11, 14, self                | 13a                |
| 14       | 172.4, C                       | --                                |                                 |                    |
| NH       | --                             | 6.69, bs                          | 14, 15                          | 15, 16             |
| 15a      | 38.3, CH <sub>2</sub>          | 3.29, <sup>ce</sup> m             | 17, self                        | NH, 15b, 16        |
| 15b      | 38.3, CH <sub>2</sub>          | 3.54, <sup>ce</sup> m             | 17, self                        | NH, 15a, 16        |
| 16a      | 32.3, CH <sub>2</sub>          | 2.84, <sup>ce</sup> m             | 15, 17, 18                      | NH, 15, 16b        |
| 16b      | 32.3, CH <sub>2</sub>          | 3.00, <sup>ce</sup> m             | 15, 17, 18                      | NH, 15, 16a        |
| 17       | 175.4, C                       | --                                |                                 |                    |
| 18       | 95.0, CH                       | 6.73, s                           | 16, 17, self                    |                    |
| 19       | 166.1, C                       | --                                |                                 |                    |
| 20       | 170.1, C                       | --                                |                                 |                    |
| 21       | 125.9, CH                      | 6.08, dd (6.0, 1.6)               | 20, 22, 23, 24, self            | 22-24              |
| 22       | 153.2, CH                      | 7.23, dd (2.0, 6.1)               | 20, 21, 23, 24, self            | 21, 23, 24         |
| 23       | 58.1, CH                       | 4.86, tq (1.4, 7.0)               | 19, 20 <i>weak</i> , 21, 22, 24 | 21, 22, 24         |
| 24       | 17.9, CH <sub>3</sub>          | 1.46, d (6.7)                     | 22, 23, self                    | 21-23              |
| 25       | 56.2, CH <sub>3</sub>          | 3.75, s                           | 17, self                        |                    |
| 26       | 20.9, CH <sub>3</sub>          | 0.95, d (6.7)                     | 8-10, self                      | 8-11               |
| 27       | 112.8, CH                      | 5.79, s                           | 5-7, self                       |                    |

All experiments in CDCl<sub>3</sub> with TMS standard, 1% v/v for <sup>13</sup>C experiment, and 0.3% v/v for the rest. <sup>a</sup>Spectrum collected on a Varian VX 500 MHz with <sup>13</sup>C-optimized cryoprobe. <sup>b</sup>Spectra collected on a Bruker 600 MHz (600 MHz and 150 MHz for the <sup>1</sup>H and <sup>13</sup>C nuclei, respectively) with 1.7 mm inverse cryo-probe. <sup>c</sup>dProton species overlapped, shift assigned by HSQC. <sup>e</sup>Multiplet shift assigned by HSQC

Figure AJ.  $^1\text{H-NMR}$  (600 MHz,  $\text{CDCl}_3$ ) Spectrum of Jamaicamide F (12).

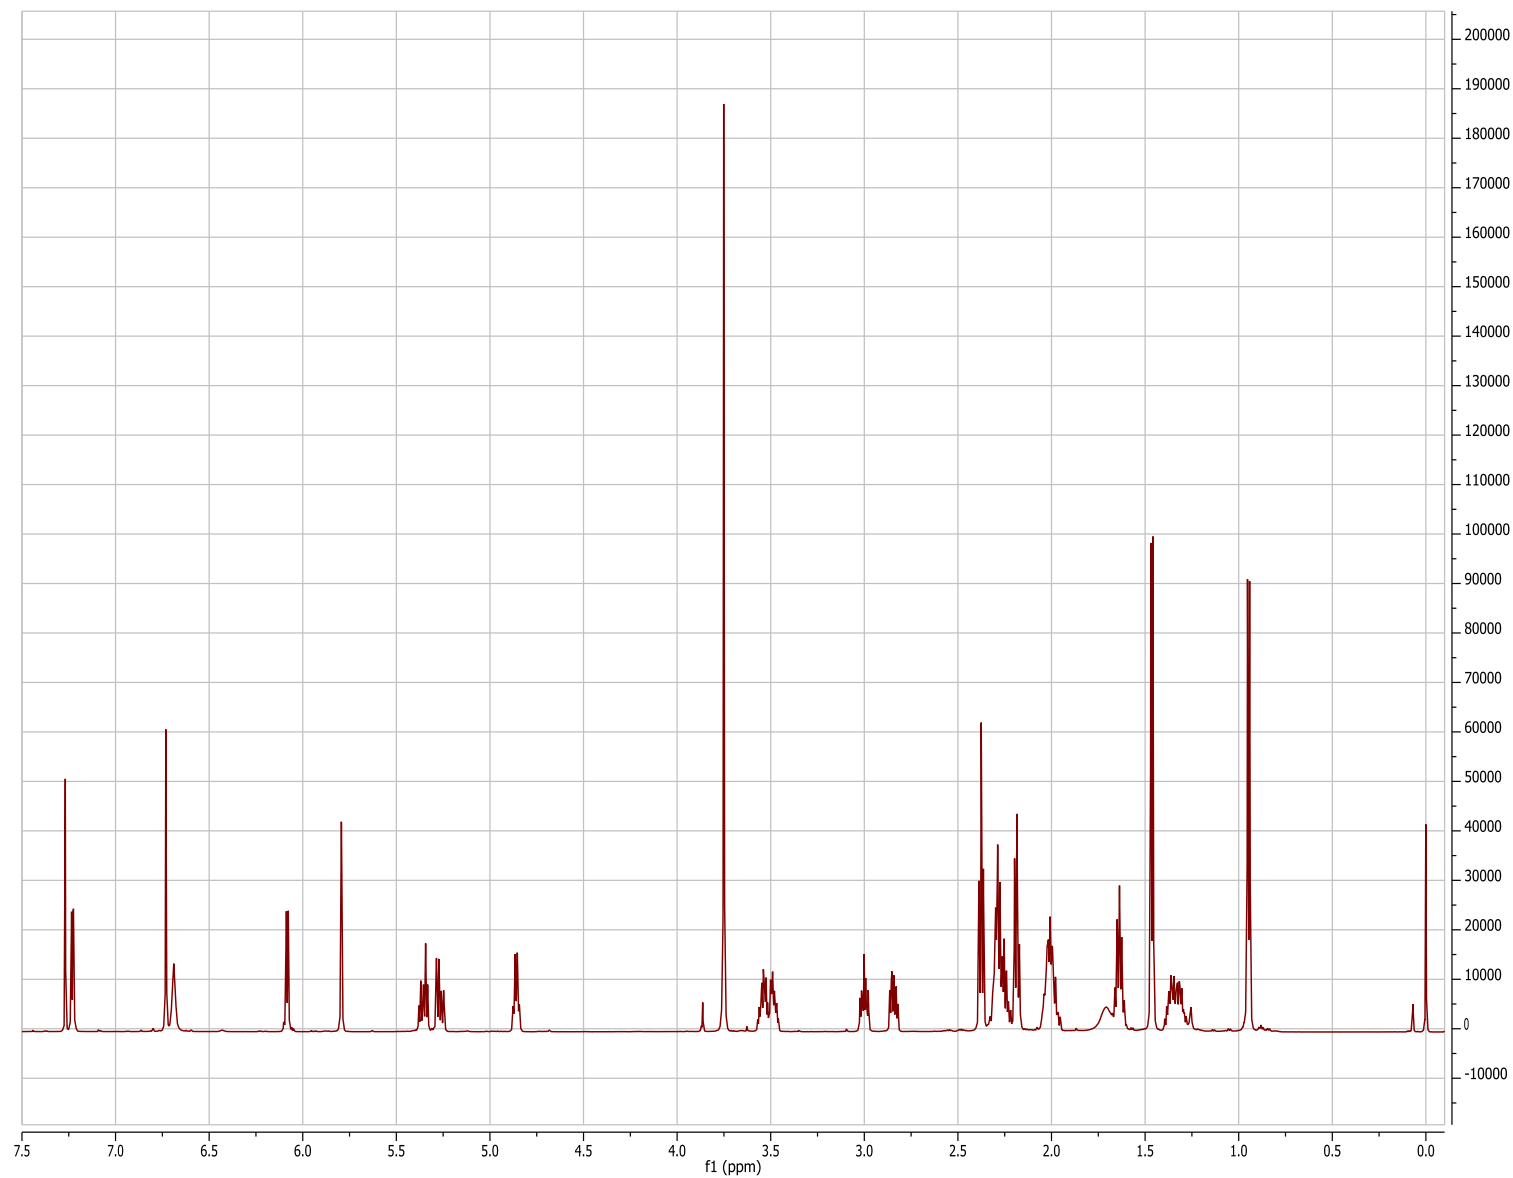

Figure AK.  $^{13}\text{C}$ -NMR (125 MHz,  $\text{CDCl}_3$ ) Spectrum of Jamaicamide F(12).

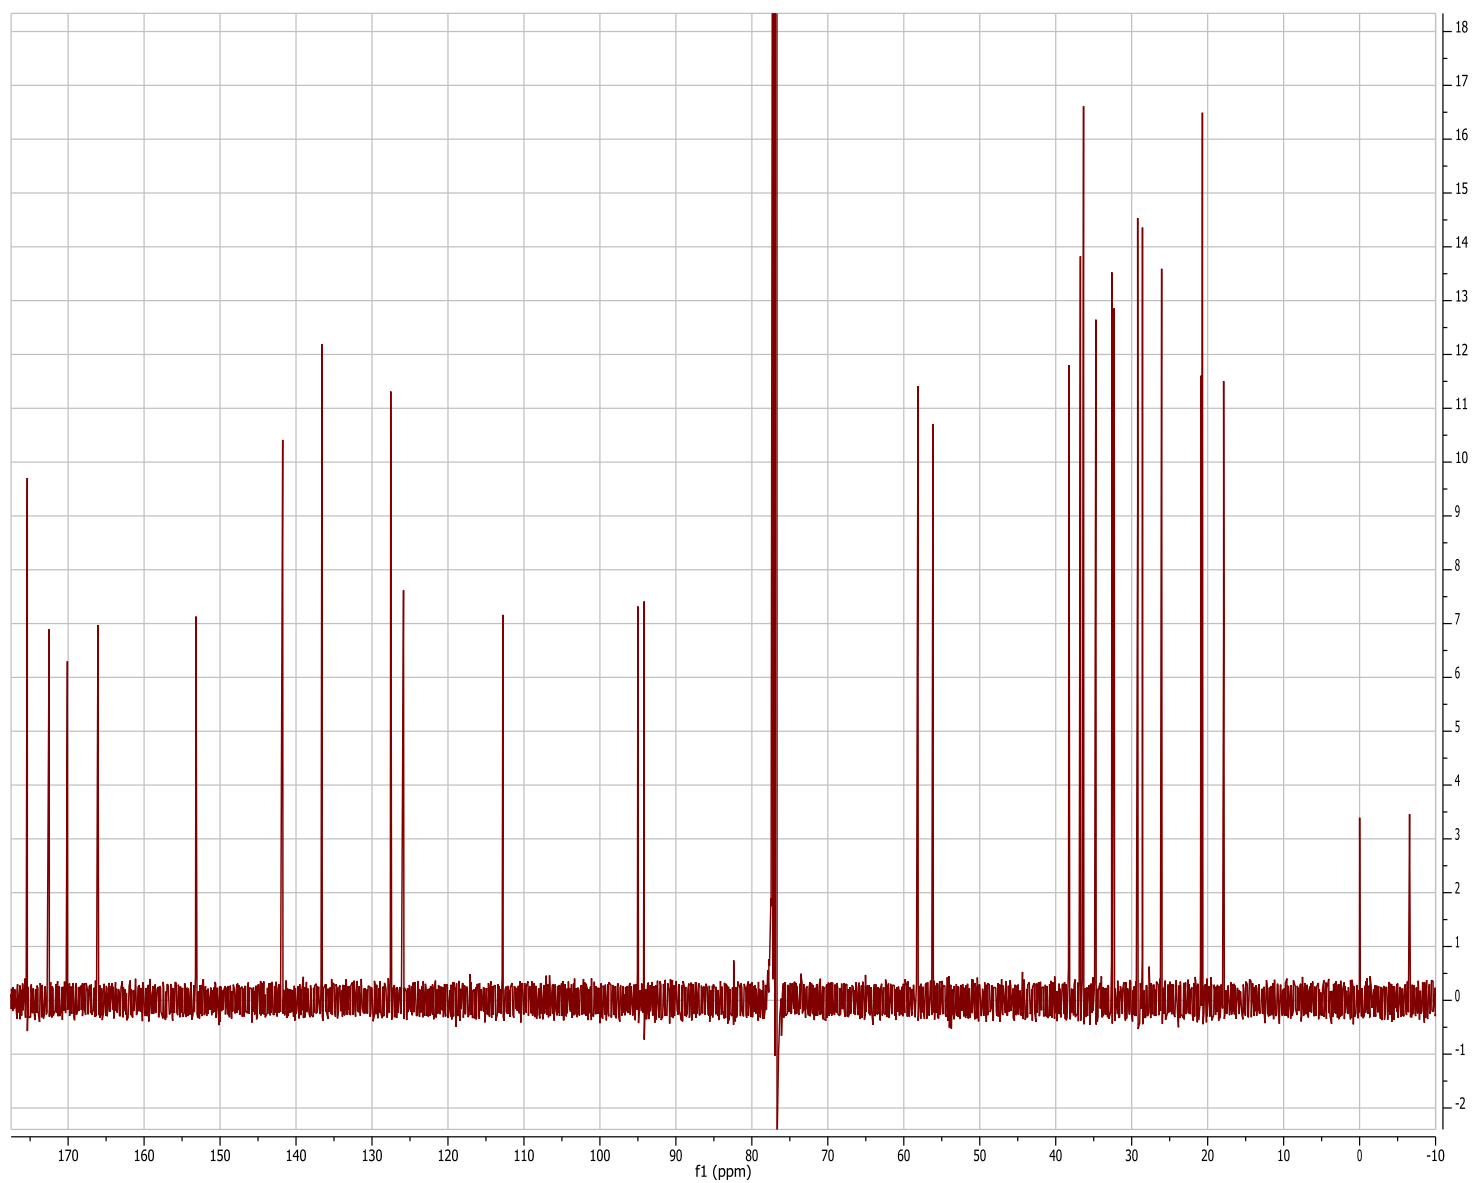



Figure AL. HSQC-NMR (600 MHz, CDCl<sub>3</sub>) Spectrum of Jamaicamide F (12).

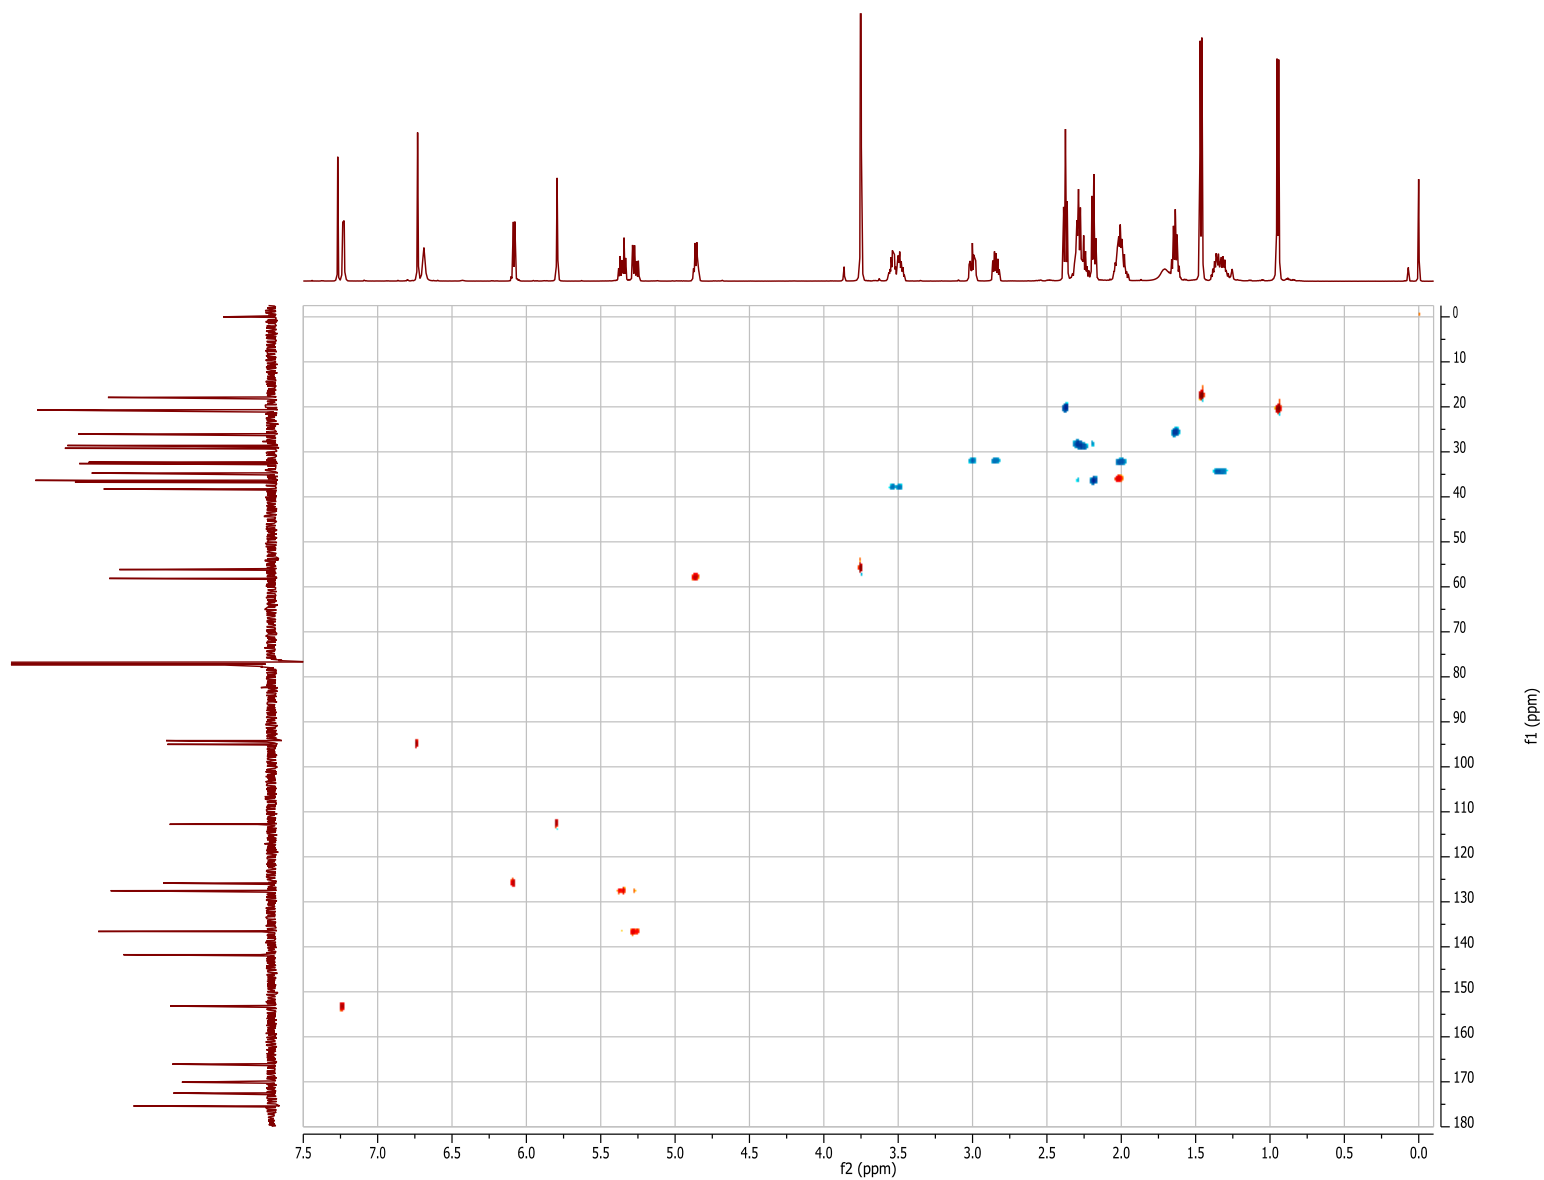

Figure AM. HMBC-NMR (600 MHz, CDCl<sub>3</sub>) Spectrum of Jamaicamide F (12).

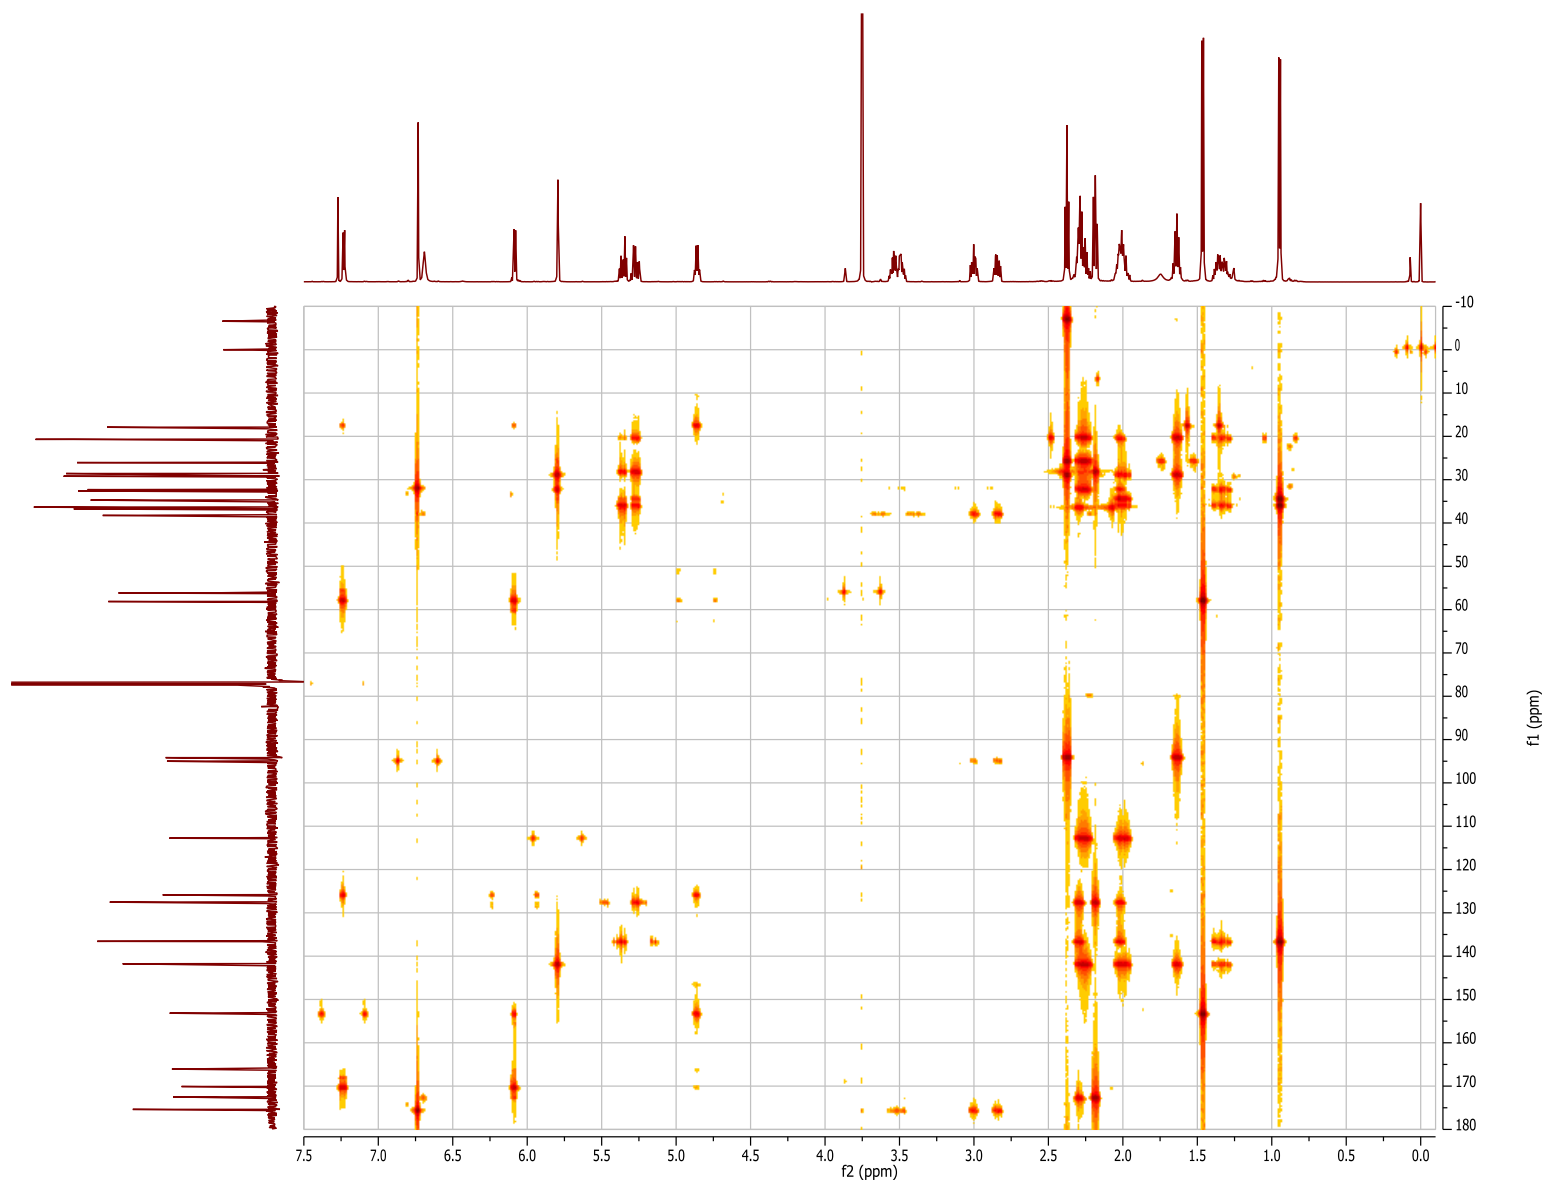

**Figure AN. TOCSY-NMR (600 MHz, CDCl<sub>3</sub>) Spectrum of Jamaicamide F (12).**

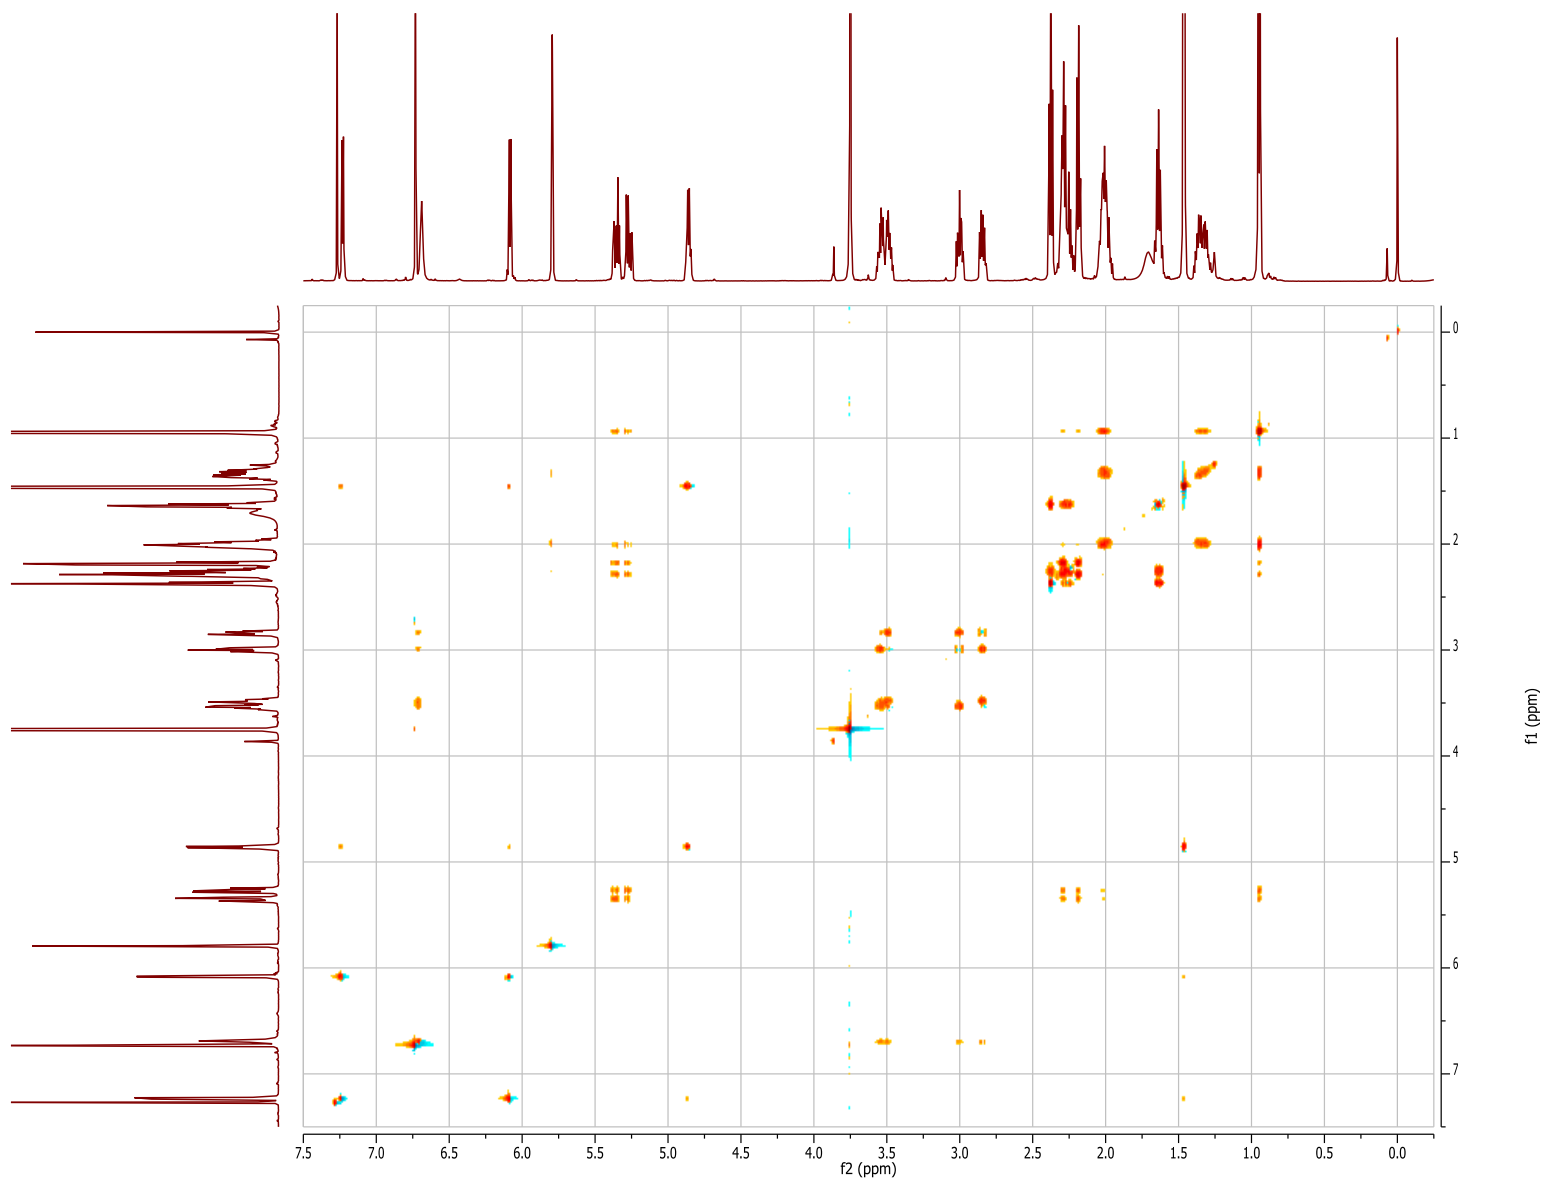

**Figure AO. MS<sup>2</sup> Fragment Spectra of Jamaicamide F (12).**

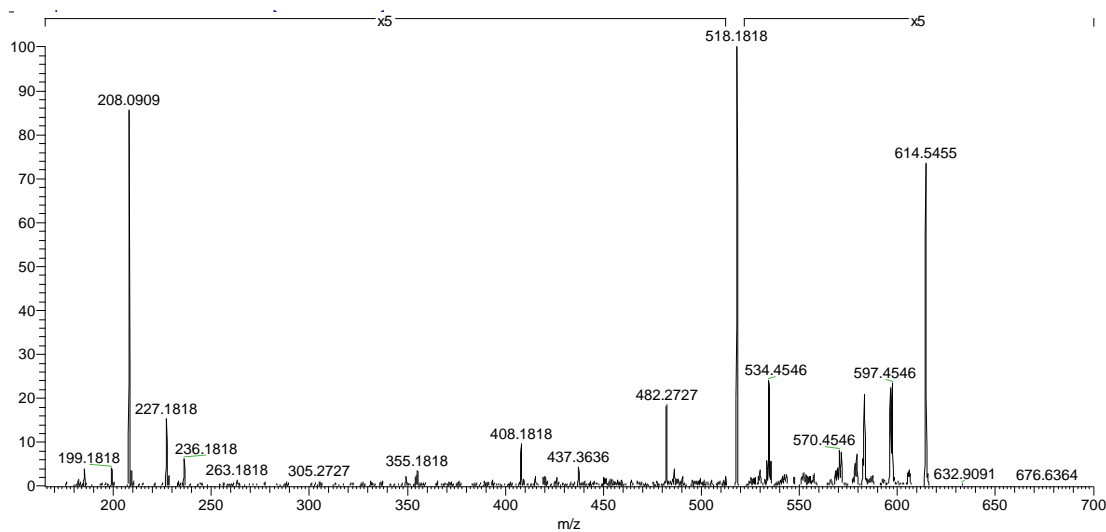

ITMS<sup>2</sup> spectrum, parent mass of 615, [M+H]<sup>+</sup> of jamaicamide F (12).

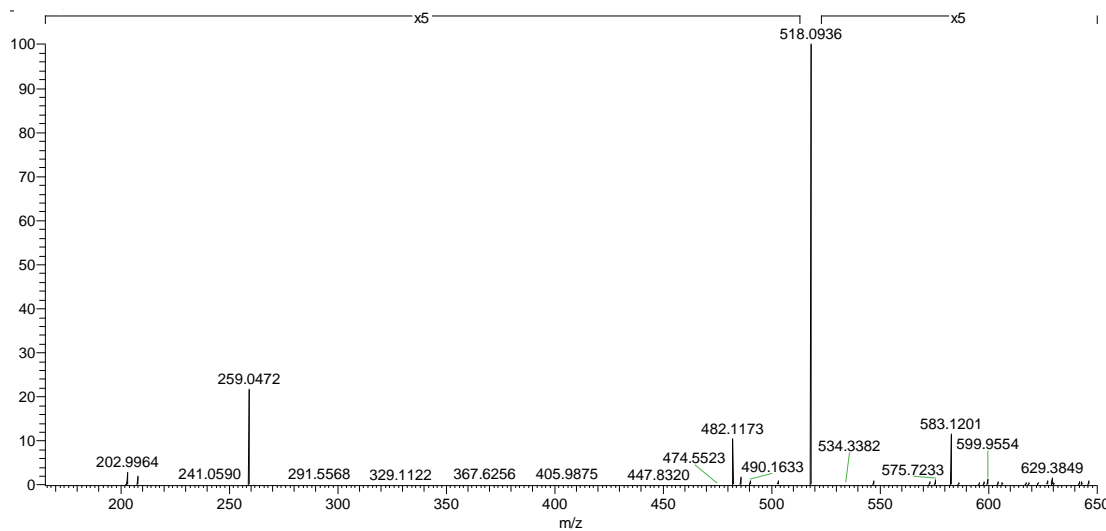

FTMS<sup>2</sup> spectrum, parent mass of 615, [M+H]<sup>+</sup> of jamaicamide F (12).

**Figure AP.** Effect of the jamaicamides on the veratridine-induced  $\text{Ca}^{2+}$  influx in murine neocortical neurons.

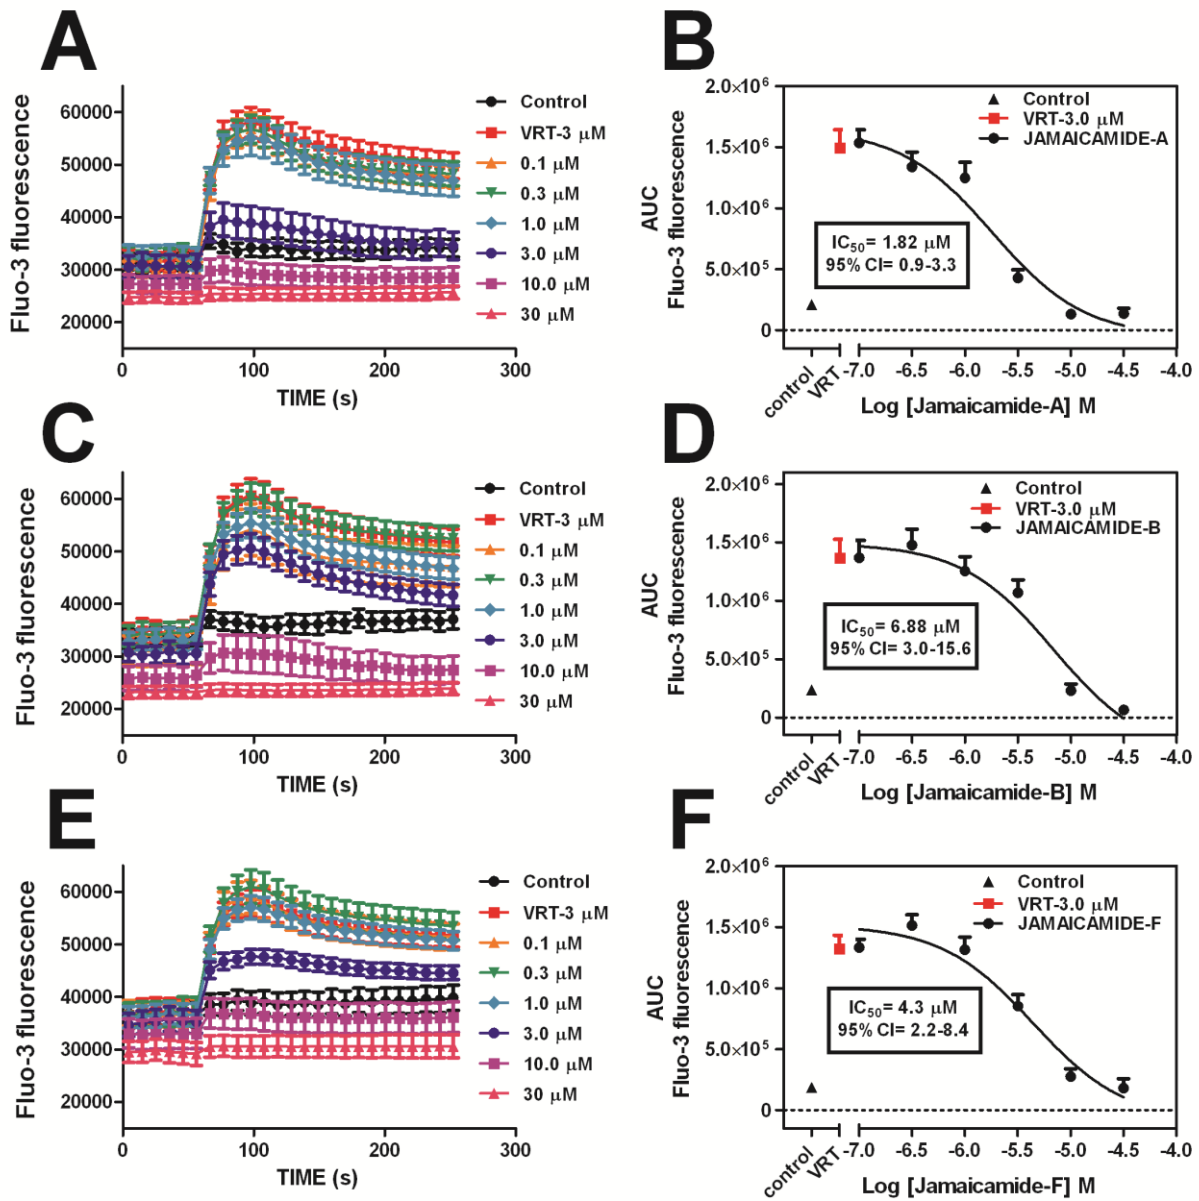

**Panel A, C, E** represents time response relationships for the decrease in veratridine-induced  $\text{Ca}^{2+}$  influx by jamaicamide A, B and F respectively. **Panel B, D, F** represents concentration-response relationships for the decrease of veratridine-induced  $\text{Ca}^{2+}$  influx by jamaicamide A, B and F (2, 3, and 12). This figure represents combined data from 5-6 experiments performed with 2-3 replicates each.

**Figure AQ.** Effect of the jamaicamides on the veratridine-induced  $\text{Na}^+$  influx in murine neocortical neurons.

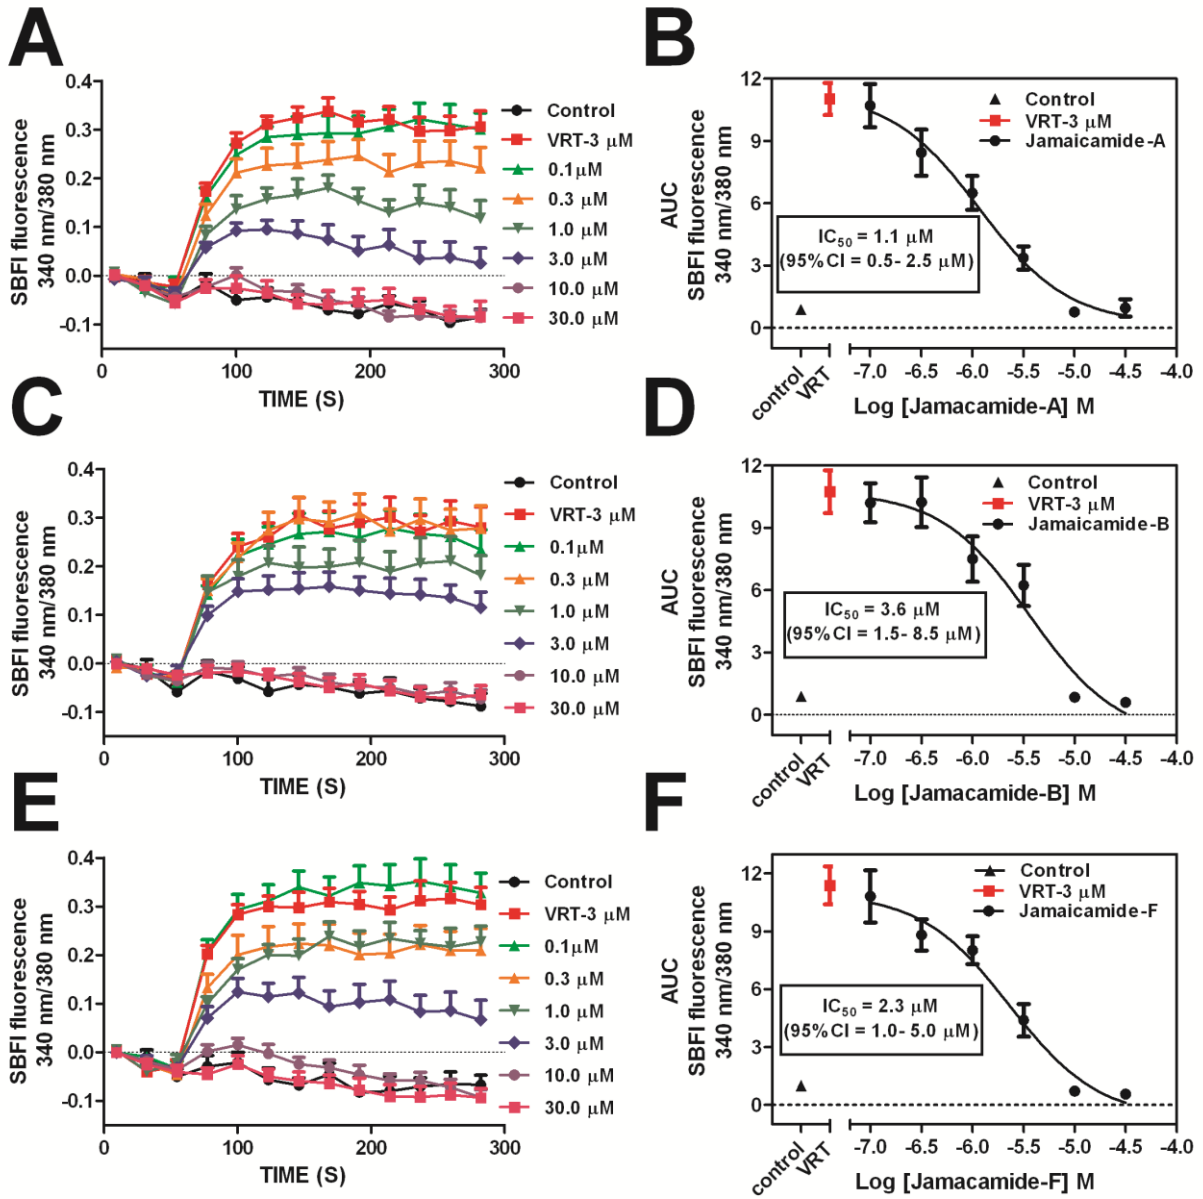

**Panel A, C, E** represents time response relationships for the reduction in the veratridine-induced  $\text{Na}^+$  influx by jamaicamide A, B and F respectively. **Panel B, D, F** represents nonlinear regression analysis of the SBFI (340/380) responses to veratridine in the absence and presence of jamaicamide (A, B and F; **2, 3, and 12**). This figure represents combined data from 4 experiments performed with 3 replicates each.

**Figure AR.**  $^1\text{H-NMR}$  (600 MHz,  $\text{CDCl}_3$ ) Spectrum of Hectoramide (4).

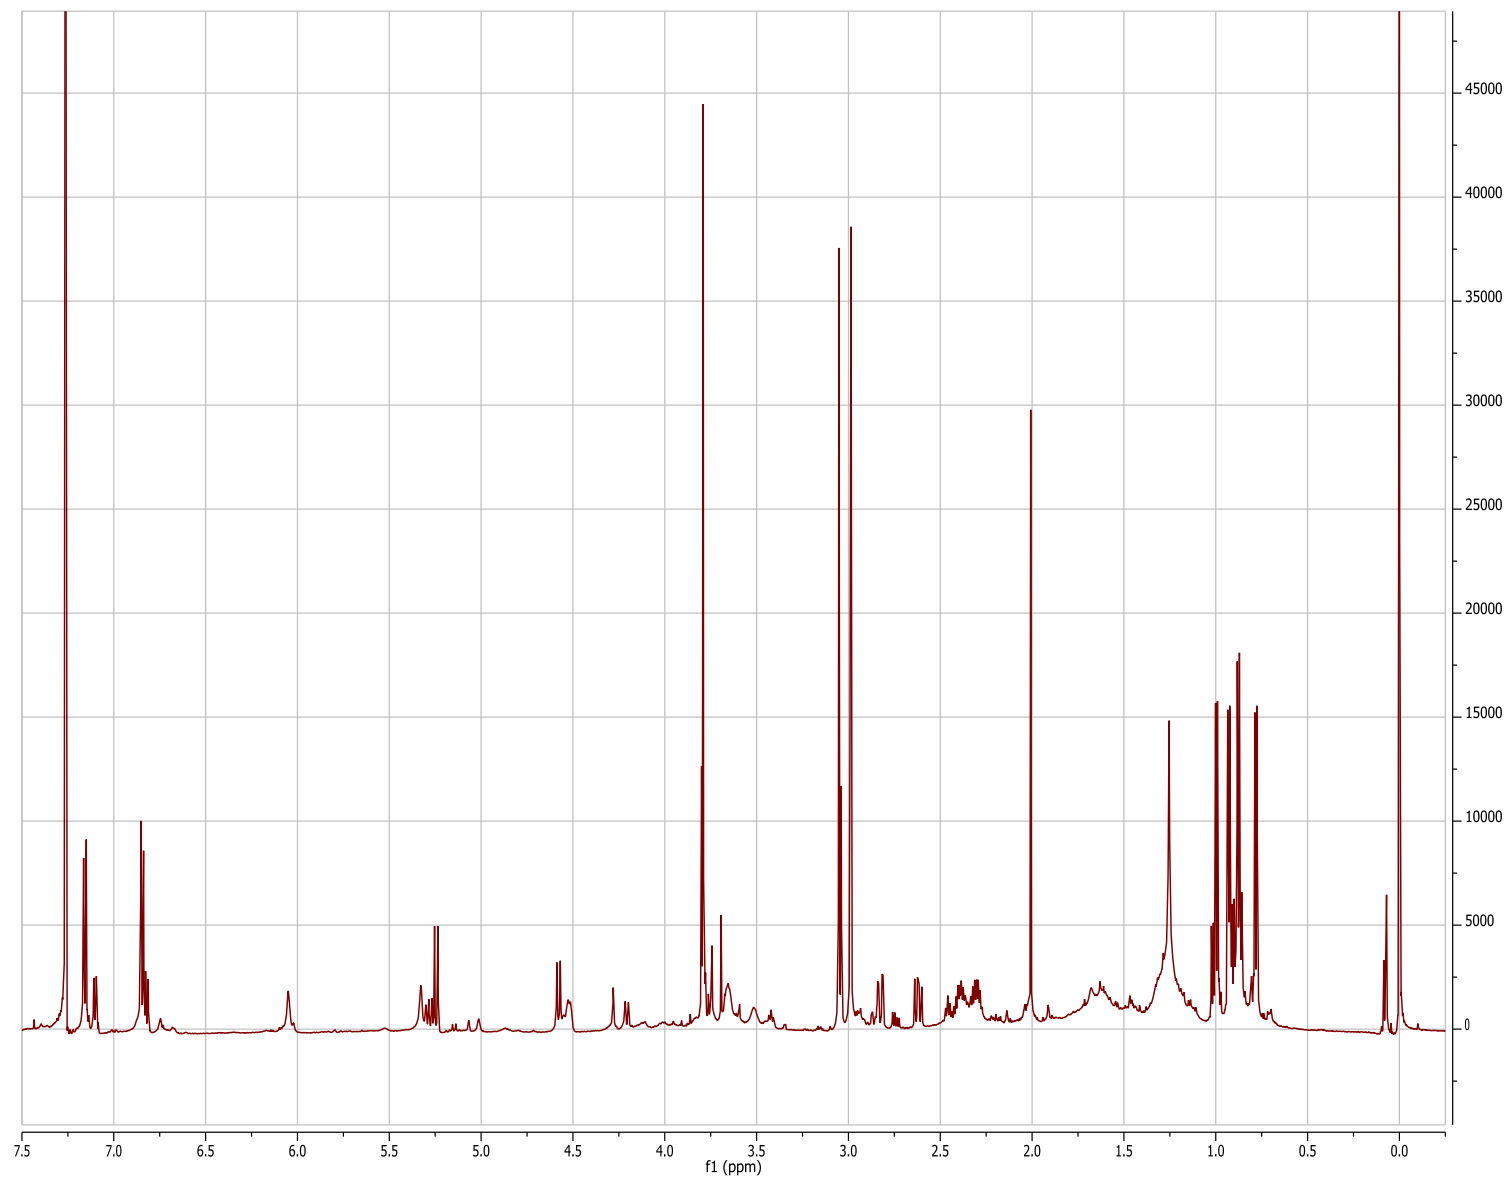

Figure AS.  $^{13}\text{C}$ -NMR (125 MHz,  $\text{CDCl}_3$ ) Spectrum of Hectoramide (4).

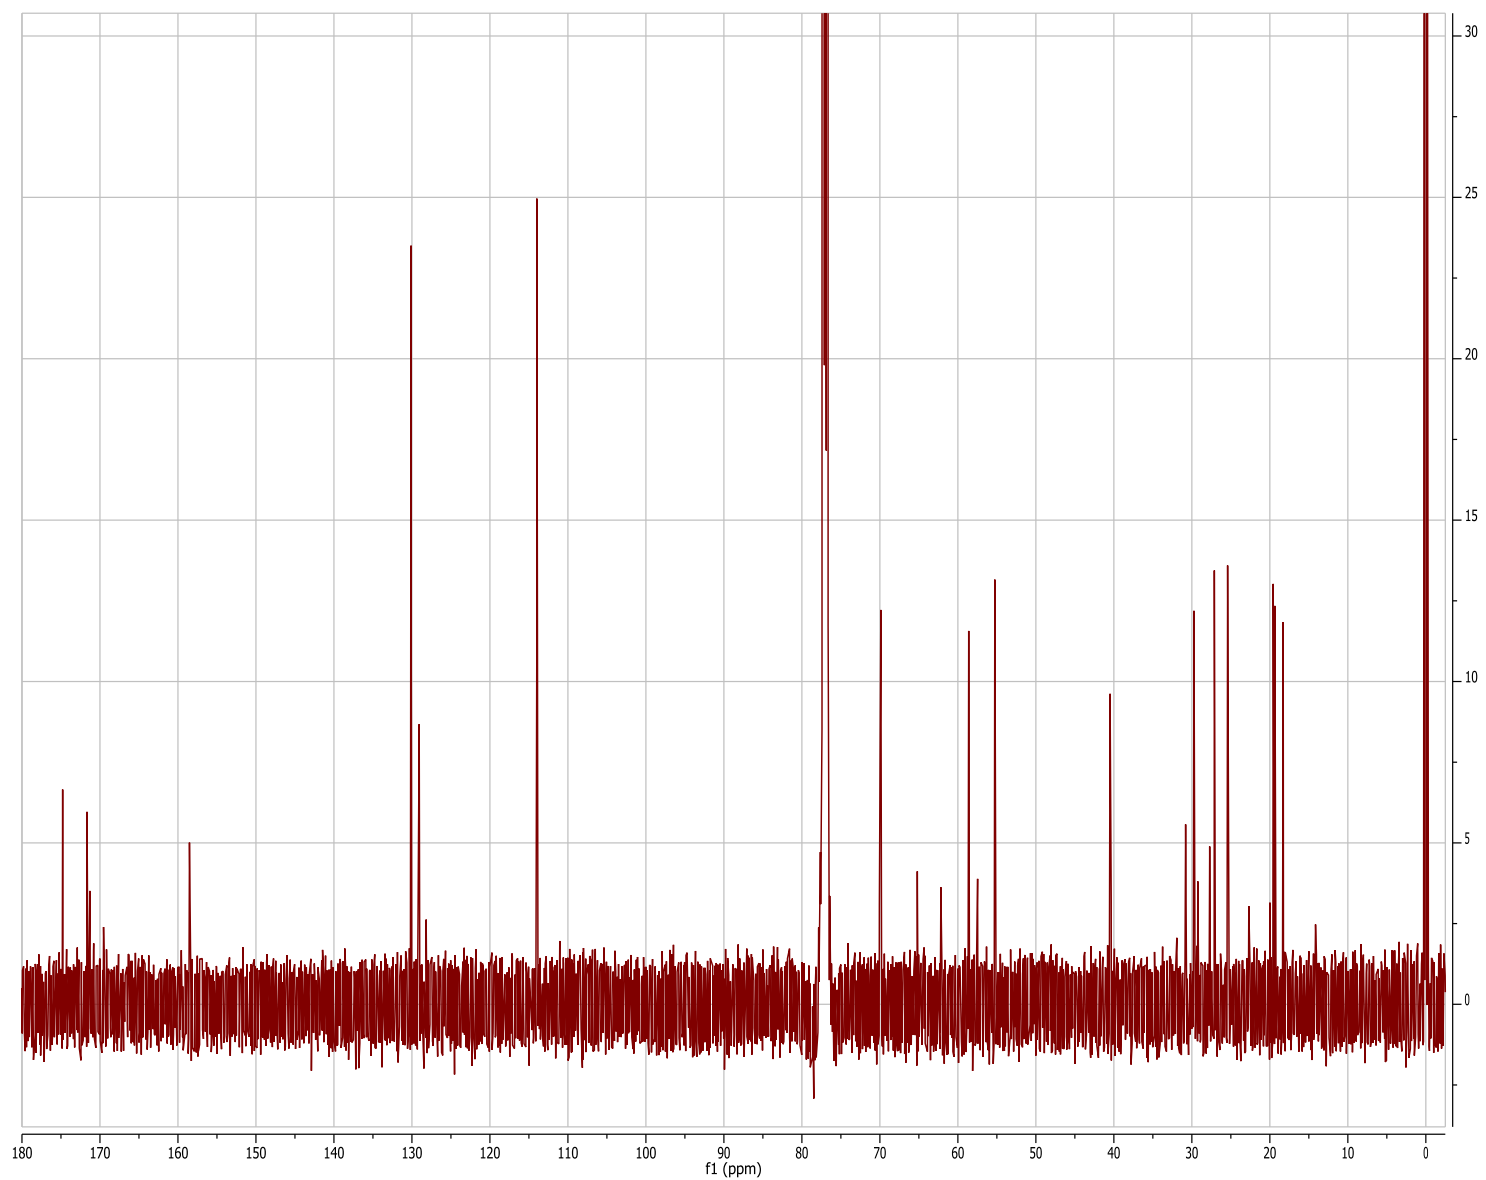



Figure AT. Predicted  $^{13}\text{C}$ -NMR for Potential Structures of Hectoramide (4).

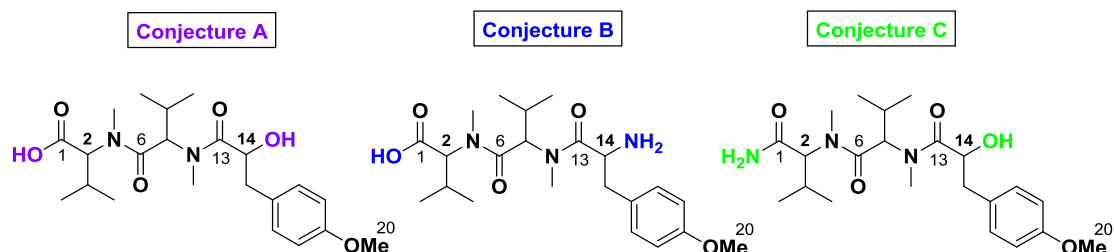

| Position, $\delta_{\text{C}}$ | Conjecture A<br>ChemDraw $\delta_{\text{C}}$<br>Prediction, Difference | Conjecture B<br>ChemDraw $\delta_{\text{C}}$<br>Prediction, Difference | Conjecture C<br>ChemDraw $\delta_{\text{C}}$<br>Prediction, Difference |
|-------------------------------|------------------------------------------------------------------------|------------------------------------------------------------------------|------------------------------------------------------------------------|
| 1, 171.3                      | 175.7, -4.4                                                            | 175.7, -4.4                                                            | 176.7, -5.4                                                            |
| <b>2, 62.2</b>                | <b>80.4, -18.2</b>                                                     | <b>80.4, -18.2</b>                                                     | <b>72.5, -10.3</b>                                                     |
| 3, 25.4                       | 27.7, -2.3                                                             | 27.7, -2.3                                                             | 26.7, -1.3                                                             |
| 4, 18.2(8)                    | 19.2, -0.9                                                             | 19.2, -0.9                                                             | 18.8, -0.5                                                             |
| 5, 19.6                       | 19.2, 0.4                                                              | 19.2, 0.4                                                              | 18.8, 0.8                                                              |
| 6, 30.8                       | 32.5, -1.7                                                             | 32.5, -1.7                                                             | 32.1, -1.3                                                             |
| 7, 171.7                      | 172.7, -1.0                                                            | 172.7, -1.0                                                            | 172.7, -1.0                                                            |
| 8, 58.6                       | 68.1, -9.5                                                             | 67.8, -9.2                                                             | 67.7, -9.1                                                             |
| 9, 27.1                       | 27.3, -0.2                                                             | 27.3, -0.2                                                             | 27.3, -0.2                                                             |
| 10, 18.3(4)                   | 18.8, -0.5                                                             | 18.8, -0.5                                                             | 18.8, -0.5                                                             |
| 11, 19.4                      | 18.8, 0.6                                                              | 18.8, 0.6                                                              | 18.8, 0.6                                                              |
| 12, 29.7                      | 32.4, -2.7                                                             | 32.1, -2.4                                                             | 32.4, -2.7                                                             |
| 13, 174.8                     | 168.9, 5.9                                                             | 170.0, 4.8                                                             | 168.9, 5.9                                                             |
| <b>14, 69.9</b>               | <b>70.4, -0.5</b>                                                      | <b>51.2, 18.7</b>                                                      | <b>70.4, -0.5</b>                                                      |
| 15, 40.5                      | 41.5, -1.0                                                             | 39, 1.5                                                                | 41.5, -1.0                                                             |
| 16, 129.1                     | 128.3, 0.8                                                             | 128.9, 0.2                                                             | 128.3, 0.8                                                             |
| 17, 130.1                     | 129.8, 0.3                                                             | 129.8, 0.3                                                             | 129.8, 0.3                                                             |
| 18, 114.0                     | 114.2, -0.2                                                            | 114.2, -0.2                                                            | 114.2, -0.2                                                            |
| 19, 158.5                     | 157.8, 0.7                                                             | 157.8, 0.7                                                             | 157.8, 0.7                                                             |
| 20, 55.3                      | 55.8, -0.5                                                             | 55.8, -0.5                                                             | 55.8, -0.5                                                             |

**Figure AU. HSQC (600 MHz, CDCl<sub>3</sub>) Spectrum of Hectoramide (4).**

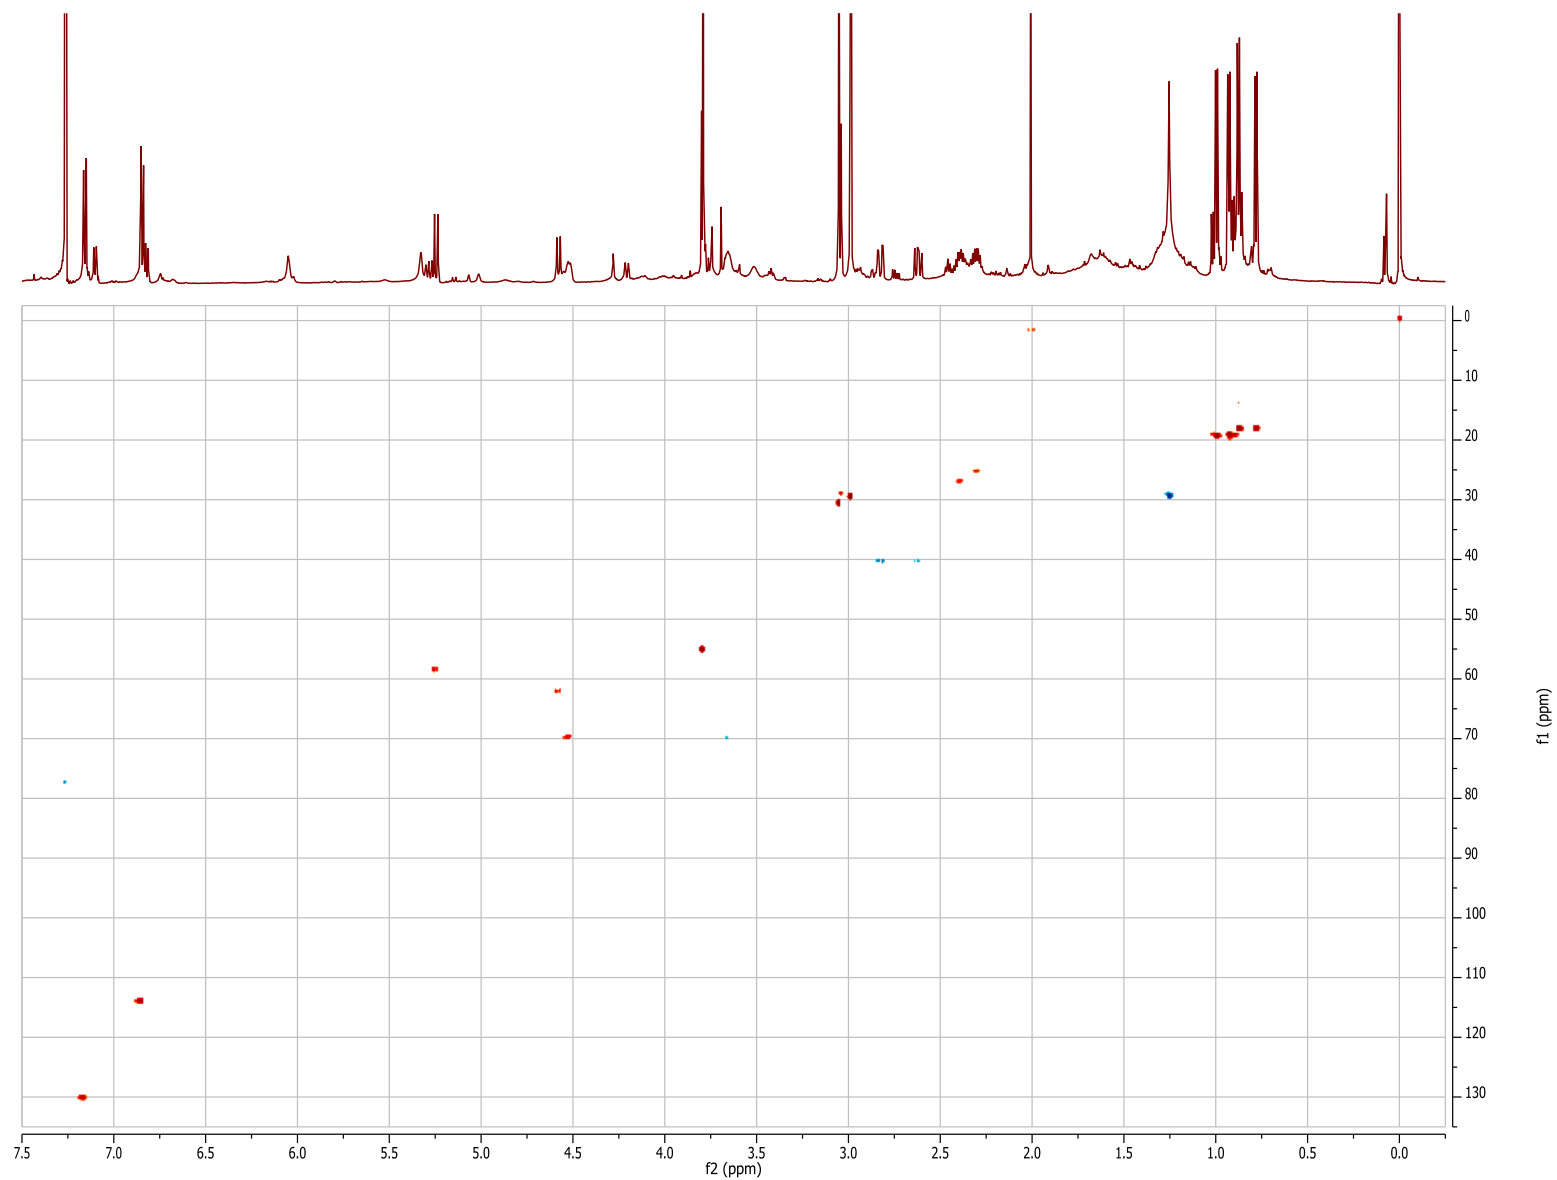

**Figure AV. HMBC (600 MHz, CDCl<sub>3</sub>) Spectrum of Hectoramide (4), Long Duration.**

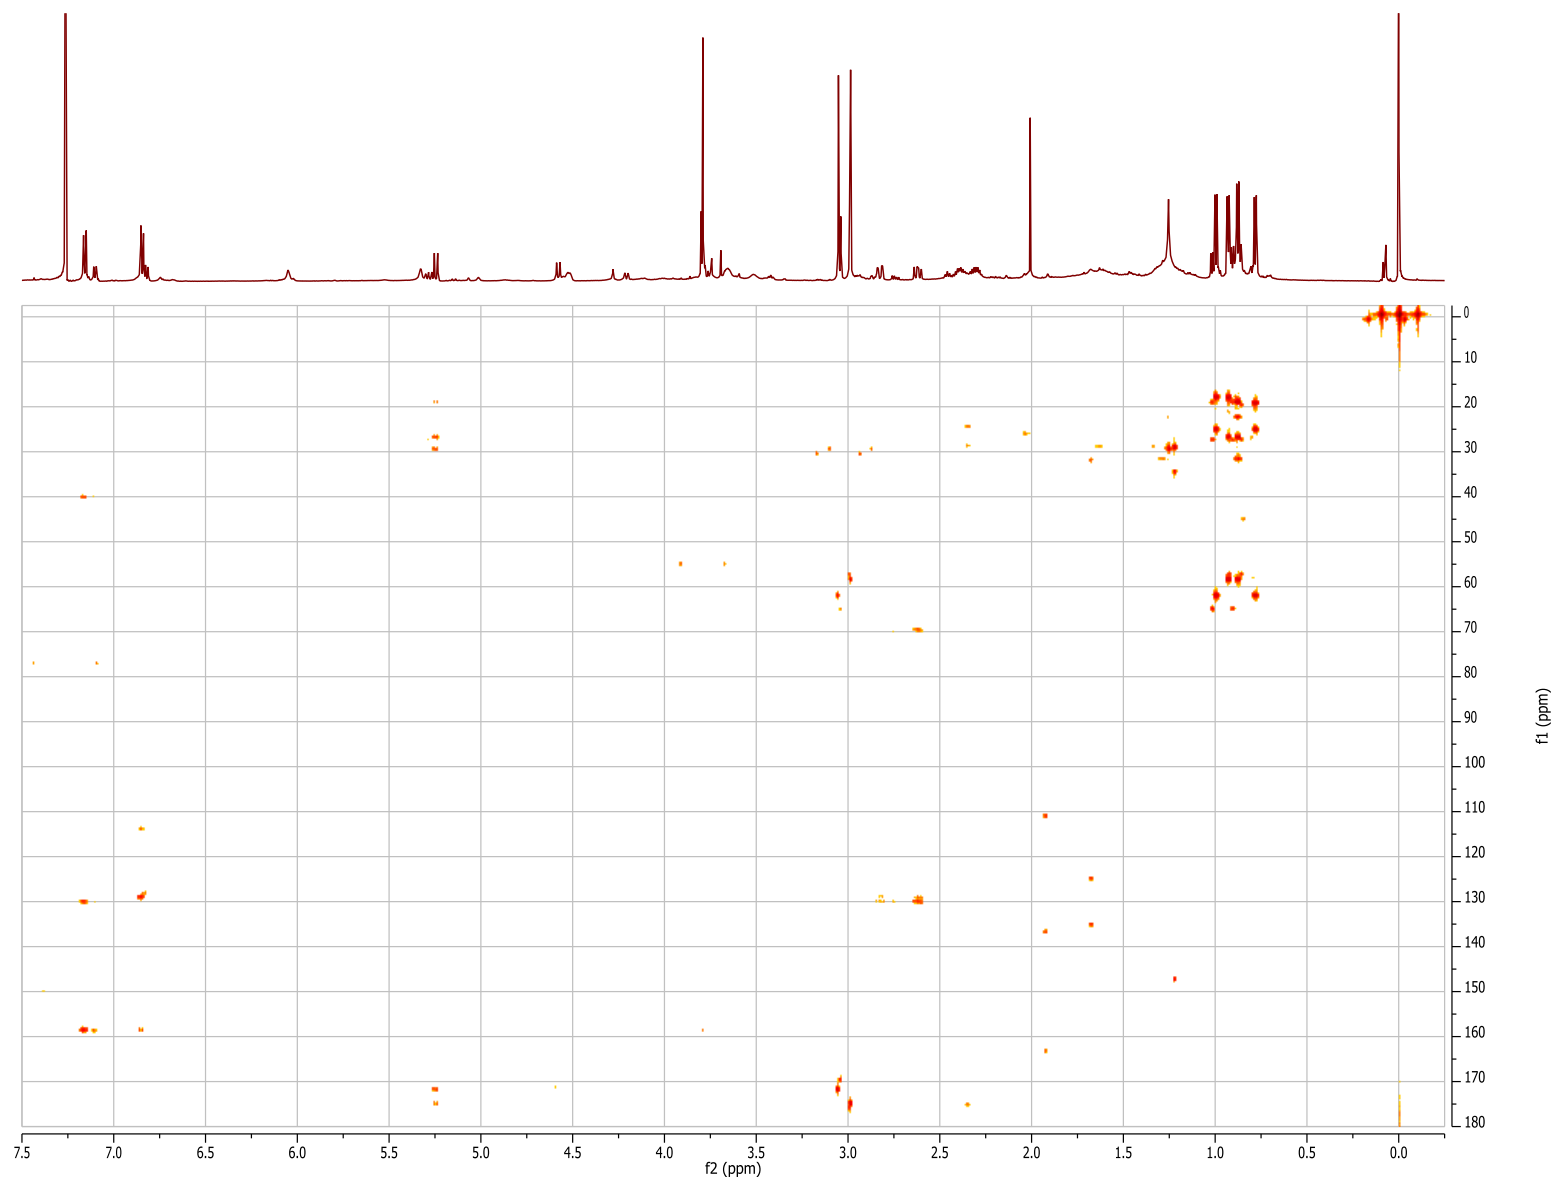

**Figure AW. HMBC (600 MHz, CDCl<sub>3</sub>) Spectrum of Hectoramide (4), Short Duration.**

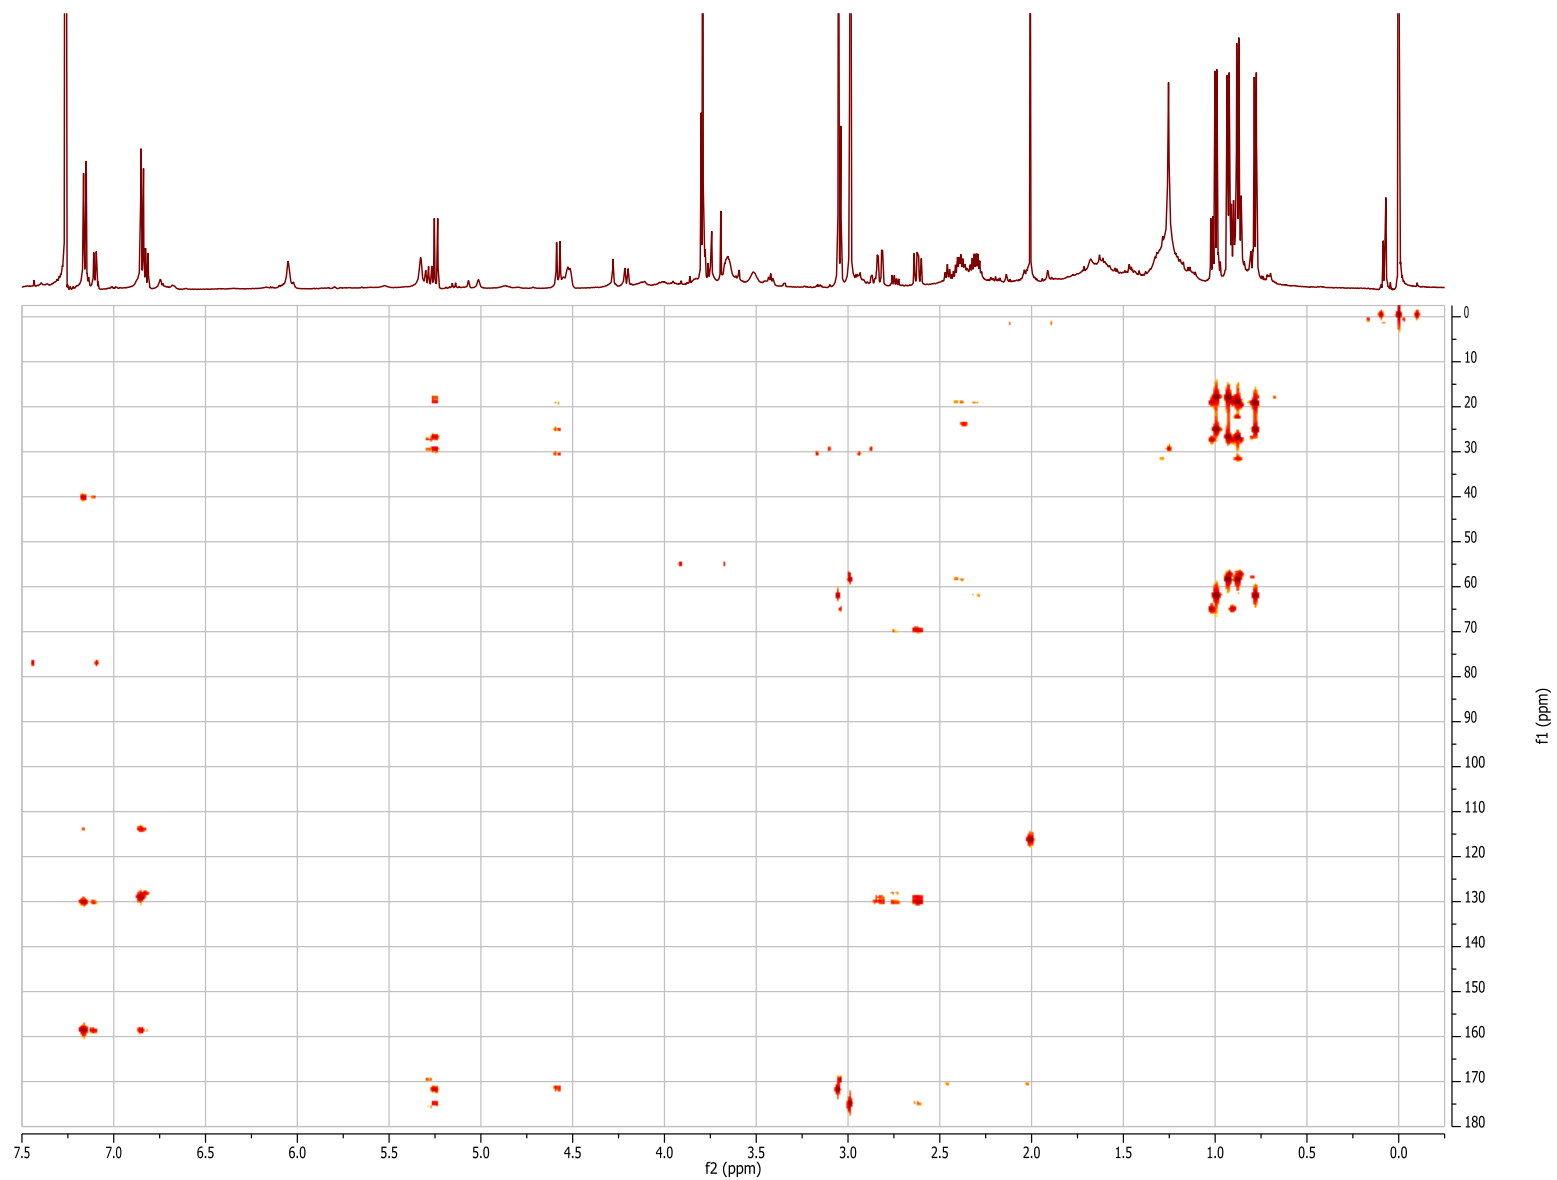

**Figure AX. TOCSY (600 MHz, CDCl<sub>3</sub>) Spectrum of Hectoramide (4).**

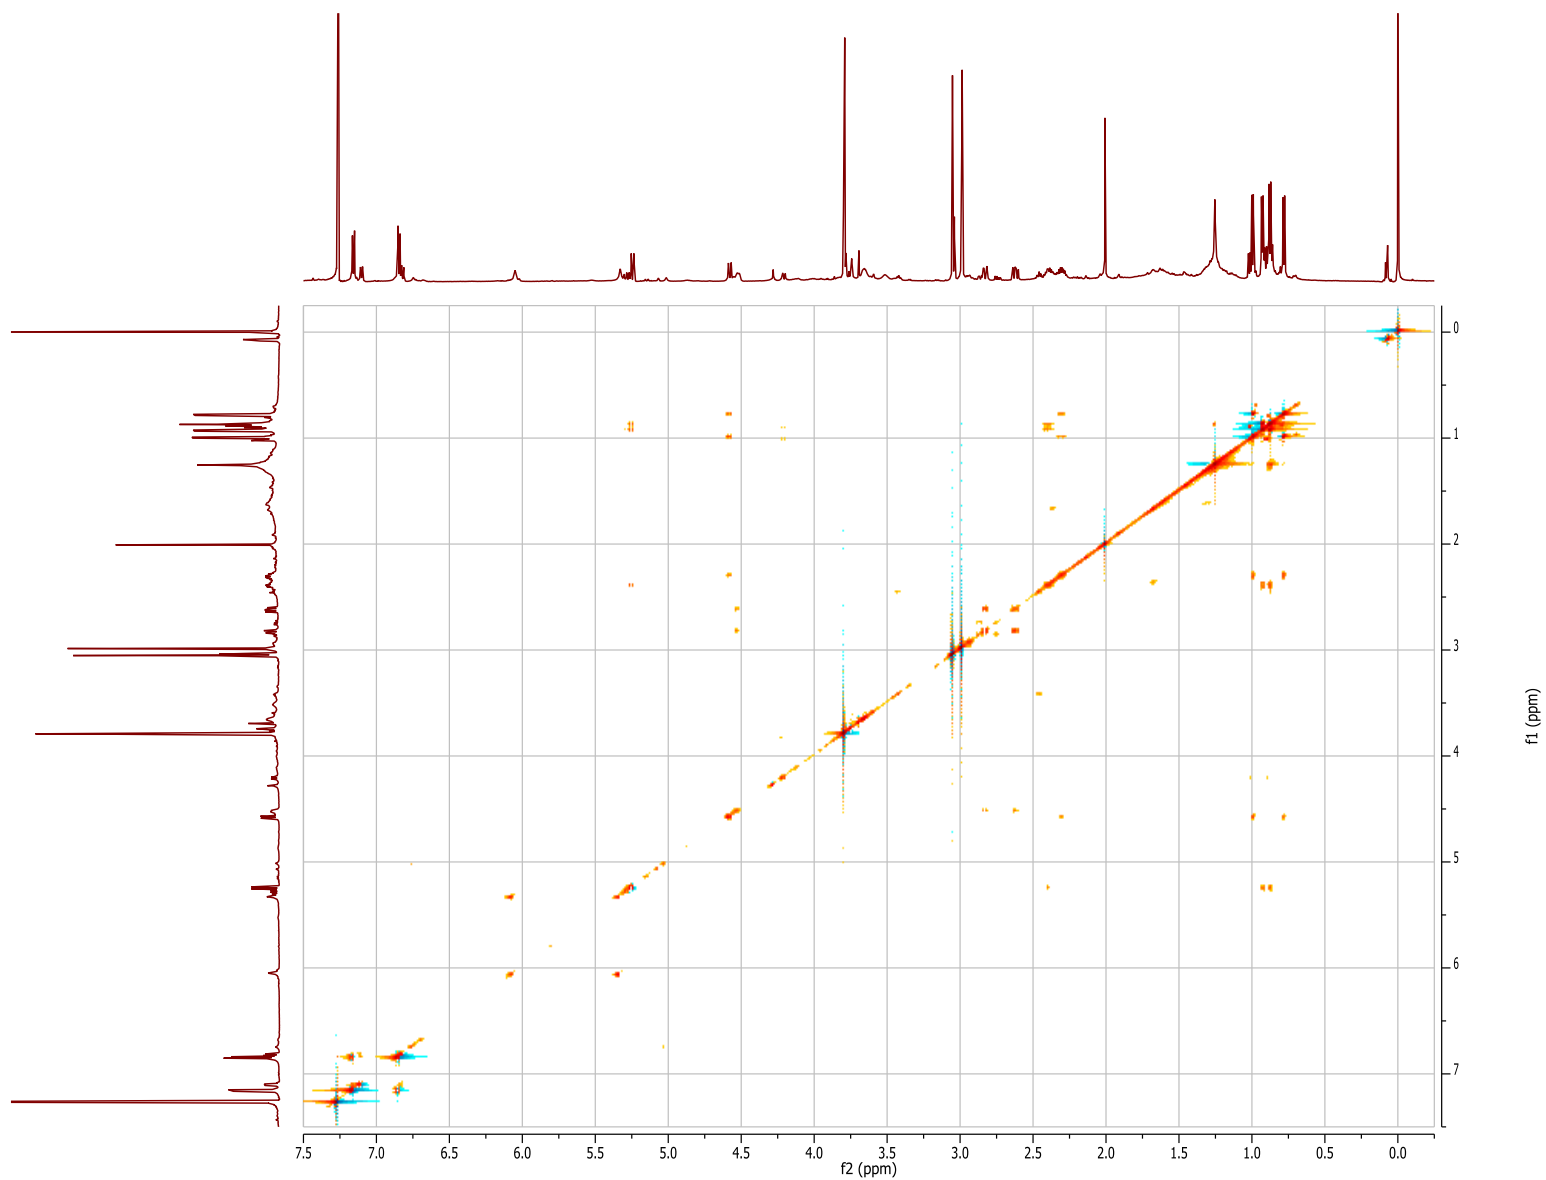

Figure AY. GC-MS Analysis of 2-S-Octonol Ester Standards.

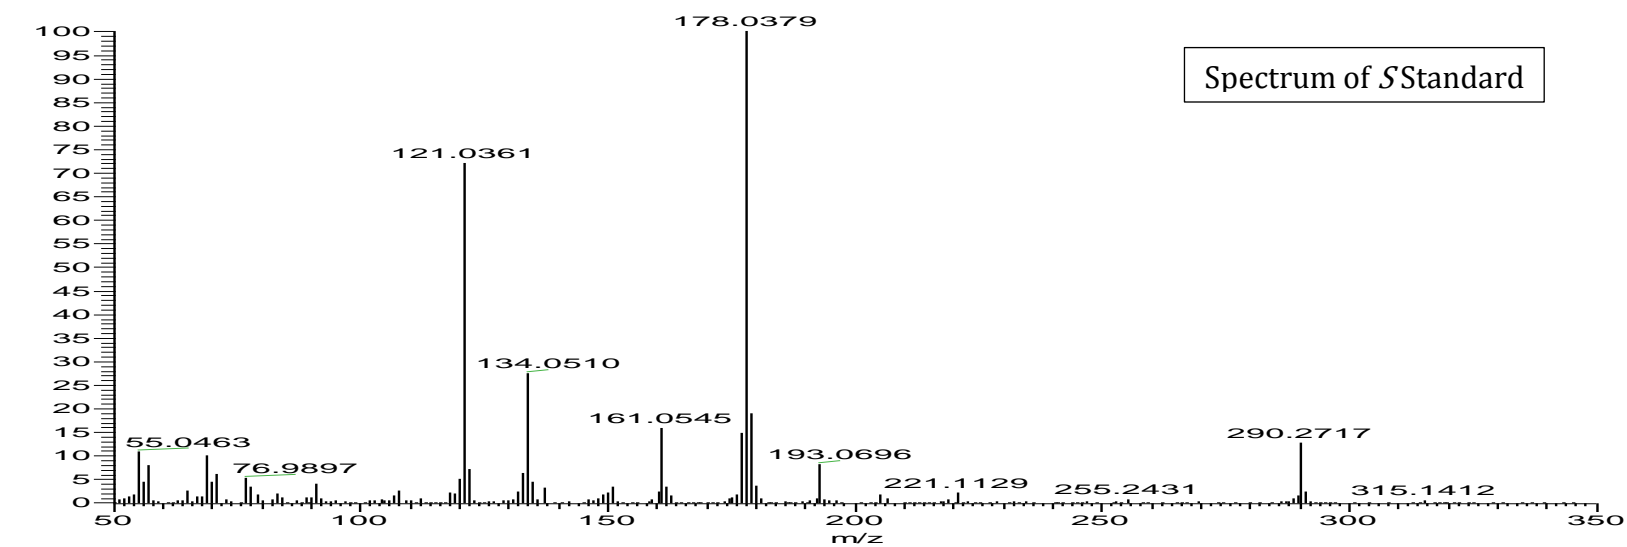

Spectrum of *S* Standard

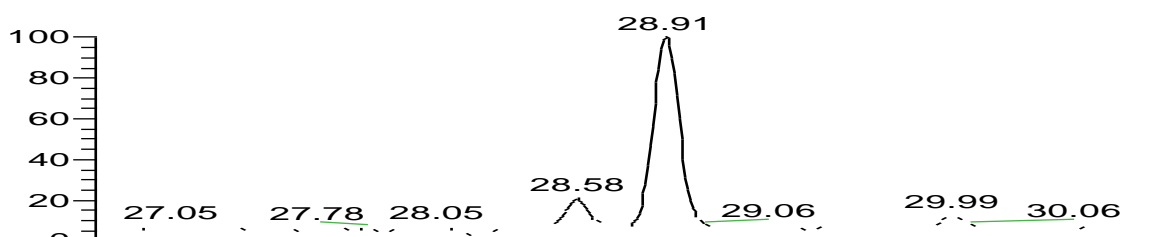

Chromatogram of *S* Standard,  
177.75-178.25 *m/z*

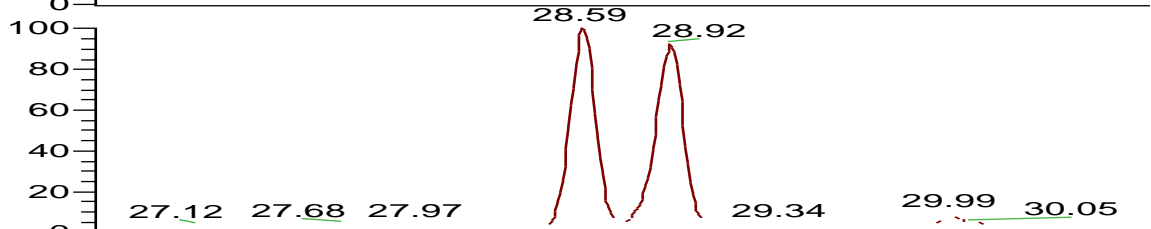

Chromatogram of a 1:1 mix *S*/*R*  
Standards,  
177.75-178.25 *m/z*

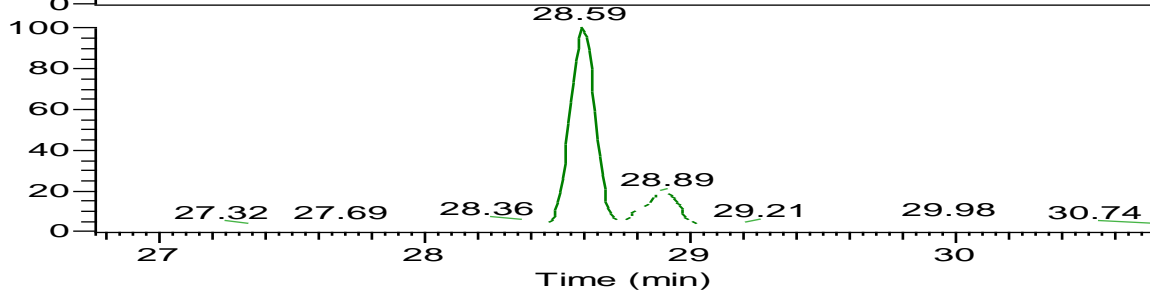

Chromatogram of *R* Standard,  
177.75-178.25 *m/z*

Figure AZ. GC-MS Analysis of 2-S-Octonol Ester Derivatized Hydrolysate of Hectoramide (4).

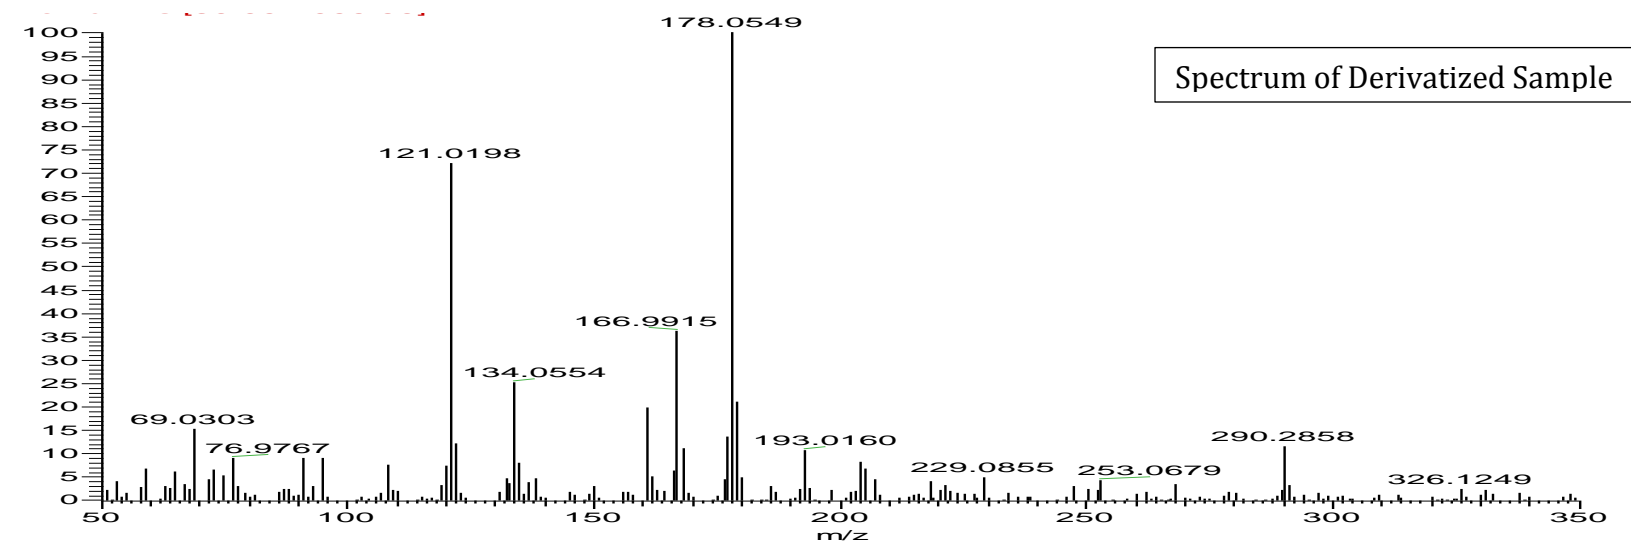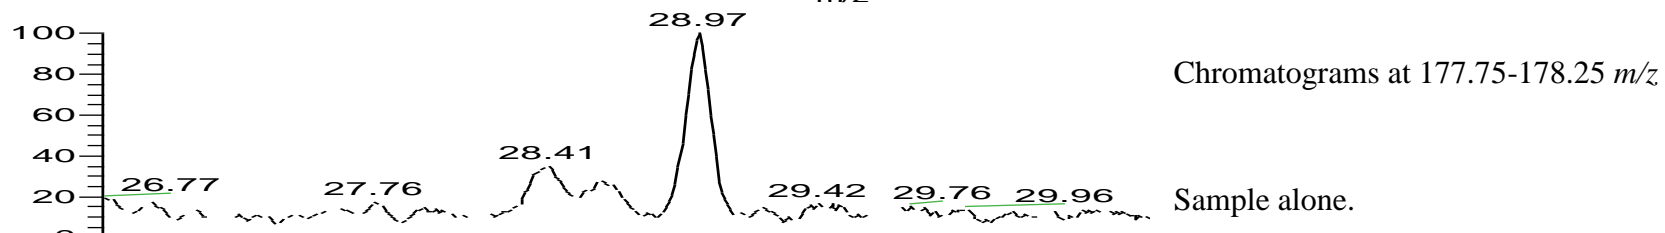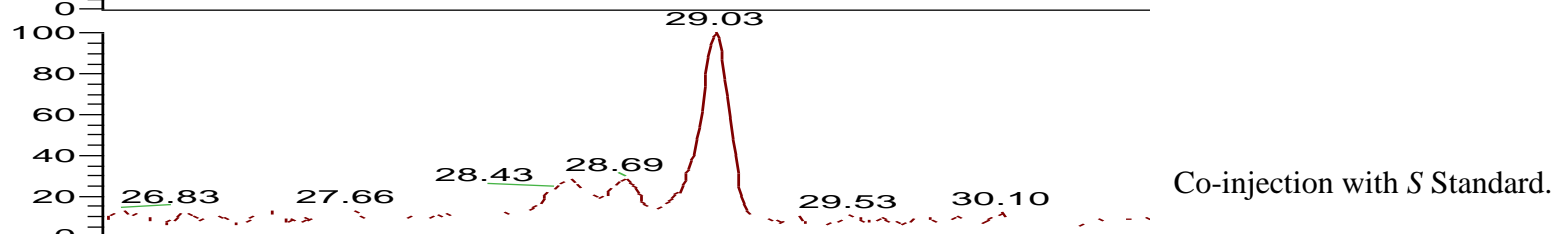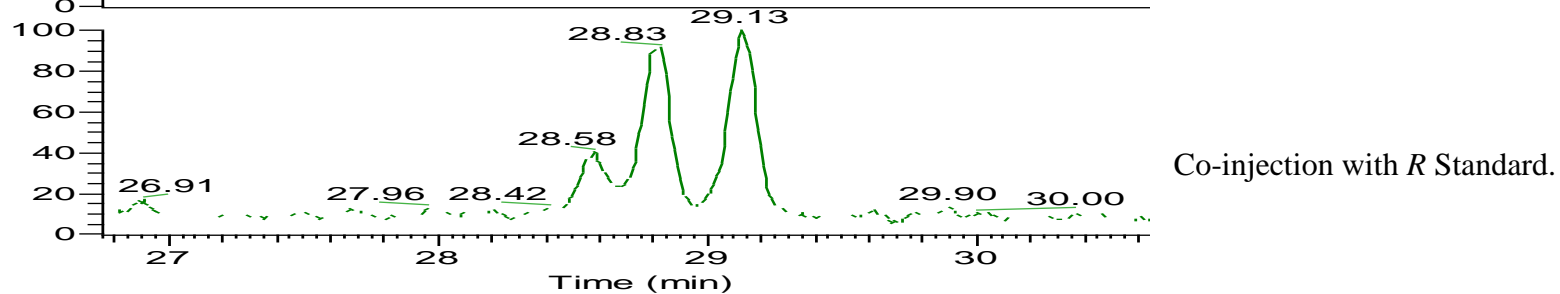

**Figure AAA. Marfey's Analysis of D-FDAA Derivatized Hydrolysate of Hectoramide (4).**

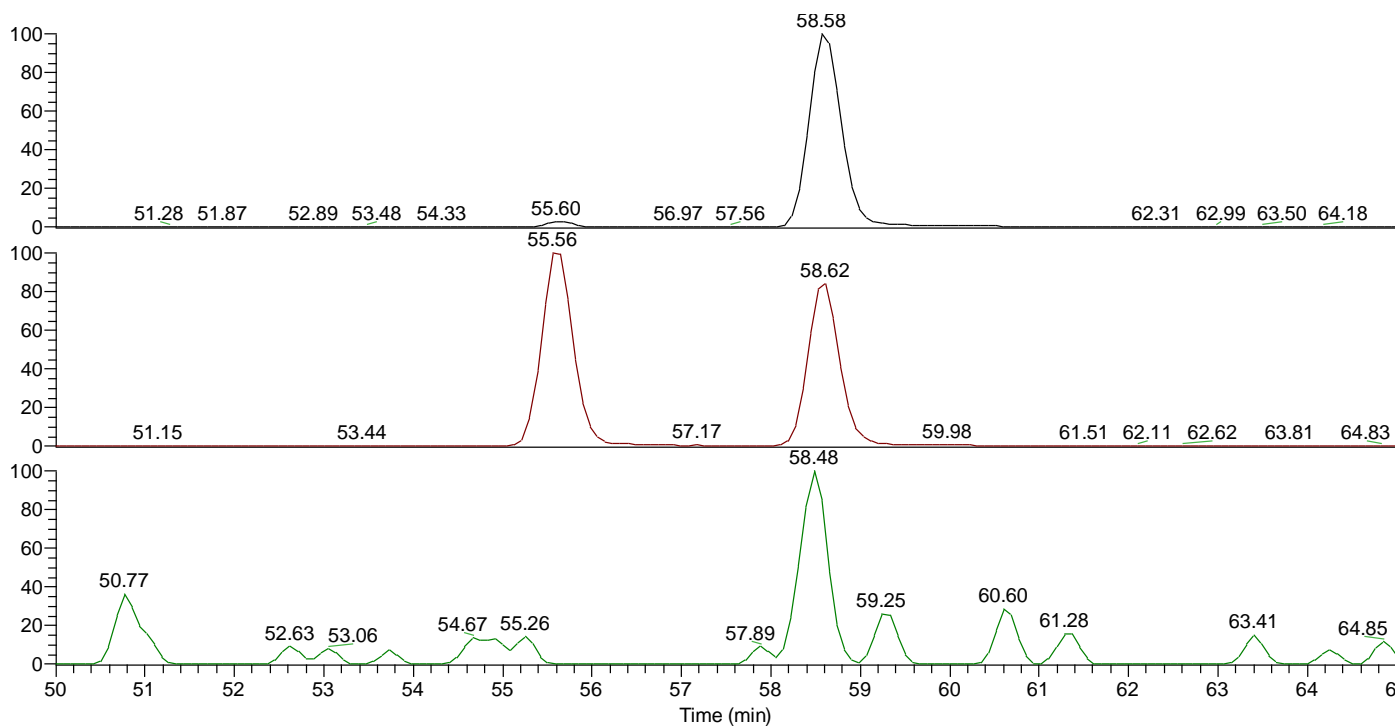

Chromatograms of  
383.70-384.10  $m/z$

D-FDAA derivatized  
L-N-Me-Val  
standard.

D-FDAA derivatized  
D/L-N-Me-Val  
standard.

D-FDAA derivatized  
hydrolysate.
